# Supplementary material for: Effects of Different Chemicals on Sexual Regulation in Persimmon (Diospyros kaki Thunb.) Flowers
Source: Frontiers journal article supplement (doi:10.3389/fpls.2022.876086), 2022-05-26
Supplement: Table_4.XLS [file Table_4.XLS]

## Sheet: Sheet1
Supplementary Table 6 Relative content of identified metabolites detected by LC-MS of 6 samples.
Ion mode	Metabolite ID	Molecular Weight	Formula	Name	Area[Treatment-Treatment-1]	Area[Treatment-Treatment-2]	Area[Treatment-Treatment-3]	Area[Control-Control-1]	Area[Control-Control-2]	Area[Control-Control-3]
Positive	6.51_442.09022	442.09	C22 H18 O10	(-)-Catechin gallate	2.60117e+06	2.0596e+06	2.27848e+06	1.19462e+06	2.99776e+06	3.0615e+06
	1.882_442.09028	442.09	C22 H18 O10	(-)-Epicatechin gallate	4.23726e+07	3.89419e+07	5.35295e+07	1.29269e+07	4.57762e+07	3.81152e+07
	2.448_306.07402	306.074	C15 H14 O7	(-)-epigallocatechin	2.12203e+09	2.44243e+09	1.84835e+09	5.93482e+08	2.62016e+09	2.12781e+09
	5.417_288.06348	288.063	C15 H12 O6	(-)-fustin	1.8638e+06	1.69636e+06	2.06686e+06	4.06155e+06	2.22298e+06	2.15841e+06
	4.745_458.08527	458.085	C22 H18 O11	(-)-Gallocatechin gallate	5.62201e+06	9.86081e+06	1.27271e+07	1.05688e+06	3.54414e+07	1.77215e+07
	0.927_306.07396	306.074	C15 H14 O7	(-)-Gallocatechin	1.01152e+08	1.20727e+08	7.19778e+06	3.9673e+07	2.1535e+08	1.41845e+08
	6.035_759.29369	759.294	C34 H46 O18	(-)-Syringaresinol di-O-glucoside	5.06926e+06	4.63651e+06	5.13099e+06	5.26552e+06	4.30134e+06	5.27621e+06
	22.906_218.16721	218.167	C15 H22 O	(+)-Nootkatone	1.0027e+07	1.23721e+07	1.22938e+07	8.43197e+06	1.42559e+07	1.59733e+07
	6.425_358.14163	358.142	C20 H22 O6	(+)-Pinoresinol	3.92949e+06	3.91461e+06	3.30717e+06	7.3042e+06	3.57149e+06	3.56784e+06
	17.043_296.23494	296.235	C18 H34 O4	(+/-)12(13)-dihome	2.97728e+07	2.90553e+07	1.38916e+07	6.23372e+07	1.95552e+07	2.76564e+07
	12.717_355.27229	355.272	C20 H34 O4	(+/-)5(6)-dihet	3.50666e+06	4.31169e+06	3.34506e+06	3.62808e+06	4.07495e+06	3.45441e+06
	4.597_236.14136	236.141	C14 H22 O4	(+/-)-c75	527174	792279	289443	2.85041e+06	293527	376124
	12.5_258.16201	258.162	C17 H22 O2	(+/-)-cannabichromeorcin	509391	1.60636e+07	1.17752e+06	2.03201e+06	1.36999e+06	2.16171e+06
	12.572_334.25082	334.251	C21 H34 O3	(+/-)-cp 47,497-c7-hydroxy metabolite	7.94219e+07	7.9998e+07	8.99663e+07	5.62001e+07	1.57748e+08	1.23369e+08
	8.6_264.13622	264.136	C15 H20 O4	(±)-abscisic acid	4.11275e+07	4.19106e+07	4.09013e+07	4.12561e+07	2.14492e+07	1.83837e+07
	5.58_299.17326	299.173	C15 H22 O5	(1ar,2s,5s,6r,7r,7as)-5-methyl-1a-(3-methyl-2-buten-1-yl)-1a,3,5,6,7,7a-hexahydro-2h-oxireno[g]isochromene-2,6,7-triol	1.38418e+07	1.29993e+07	1.28727e+07	1.81497e+07	1.17966e+07	1.33718e+07
	13.668_528.27097	528.271	C32 H36 N2 O5	(1e,4s,5e,7r,9e,11ar,14s,14ar,15s,15ar,16as)-7-hydroxy-14-(1h-indol-3-ylmethyl)-4,6,15,15a-tetramethyl-4,7,14,14a,15,15a,16a,16b-octahydro-3h-cyclotrideca[d]oxireno[f]isoindole-8,11,12(13h)-trione	9.55203e+06	9.07762e+06	9.88421e+06	1.14769e+08	1.81245e+07	1.2986e+07
	7.614_457.15889	457.159	C20 H24 O11	(1r,3r,6r,8s,9r,11r,12r,13s,16r)-6,9,12,17-tetrahydroxy-16-methyl-8-(2-methyl-2-propanyl)-2,4,14,19-tetraoxahexacyclo[8.7.2.01,11 03,7 07,11 013,17]nonadecane-5,15,18-trione	636932	712547	740454	6.92376e+06	286190	311065
	6.072_330.18301	330.183	C20 H26 O4	(1r,4as)-7-(2-hydroxypropan-2-yl)-1,4a-dimethyl-9-oxo-3,4,10,10a-tetrahydro-2h-phenanthrene-1-carboxylic acid	1.95821e+07	2.03523e+07	1.45156e+07	1.22662e+07	2.65341e+07	2.61598e+07
	3.834_462.09944	462.099	C25 H22 N2 O3 S2	(1r,9r)-5-(2-naphthyl)-11-(2-thienylsulfonyl)-7,11-diazatricyclo[7.3.1.02,7]trideca-2,4-dien-6-one	1.22367e+07	1.98628e+07	2.54489e+07	8.05779e+06	1.91437e+07	1.60952e+07
	5.3_428.18071	428.181	C22 H25 F N4 O4	(1r,9r)-n-(4-fluorophenyl)-5-[(3-methoxypropanoyl)amino]-6-oxo-7,11-diazatricyclo[7.3.1.02,7]trideca-2,4-diene-11-carboxamide	6.27149e+06	5.64804e+06	4.77288e+06	6.3055e+06	4.65745e+06	4.79668e+06
	6.708_396.08554	396.086	C19 H22 N2 O3 S	(1r,9s)-11-(3-methoxypropanoyl)-3-(2-thienyl)-7,11-diazatricyclo[7.3.1.02,7]trideca-2,4-dien-6-one	1.76395e+06	1.87659e+06	1.7374e+06	288271	1.56598e+06	1.53471e+06
	2.061_440.15063	440.151	C25 H23 F N2 O3	(1r,9s)-11-(4-fluorobenzoyl)-5-(4-methoxyphenyl)-7,11-diazatricyclo[7.3.1.02,7]trideca-2,4-dien-6-one	6.97028e+06	7.01024e+06	1.3813e+07	3.35621e+06	6.62336e+06	6.64412e+06
	10.96_510.09593	510.096	C25 H20 F4 N2 O3	(1r,9s)-11-(4-fluorobenzoyl)-5-[4-(trifluoromethoxy)phenyl]-7,11-diazatricyclo[7.3.1.02,7]trideca-2,4-dien-6-one	1.13146e+06	870235	1.02849e+06	642507	3.55379e+06	1.78835e+06
	3.901_434.17711	434.177	C23 H25 F3 N2 O3	(1r,9s)-11-(tetrahydro-2h-pyran-4-yl)-5-[4-(trifluoromethoxy)phenyl]-7,11-diazatricyclo[7.3.1.02,7]trideca-2,4-dien-6-one	5.77245e+06	4.99204e+06	6.41402e+06	3.25777e+06	5.96363e+06	6.42691e+06
	7.421_360.09984	360.1	C18 H20 N2 O2 S2	(1r,9s)-11-[(methylsulfanyl)acetyl]-3-(2-thienyl)-7,11-diazatricyclo[7.3.1.02,7]trideca-2,4-dien-6-one	553774	602045	585677	6.11791e+06	884048	719998
	9.546_428.18129	428.181	C28 H26 N2 O	(1r,9s)-11-benzyl-5-(2-naphthyl)-7,11-diazatricyclo[7.3.1.02,7]trideca-2,4-dien-6-one	2.09353e+06	2.12029e+06	1.86518e+06	1.44233e+06	1.75858e+06	1.93102e+06
	2.565_470.14053	470.141	C26 H28 N2 O2 S	(1r,9s)-5-(1-benzothiophen-2-yl)-11-(cyclohexylcarbonyl)-7,11-diazatricyclo[7.3.1.02,7]trideca-2,4-dien-6-one	1.40691e+07	1.01174e+07	9.50111e+06	3.6225e+06	1.10819e+07	9.66989e+06
	2.348_426.13524	426.135	C26 H22 N2 O2 S	(1r,9s)-5-(1-benzothiophen-2-yl)-11-benzoyl-7,11-diazatricyclo[7.3.1.02,7]trideca-2,4-dien-6-one	3.25699e+06	2.74755e+06	2.93863e+06	6.66208e+06	3.16121e+06	3.1264e+06
	4.47_466.14565	466.146	C27 H25 Cl N2 O2	(1r,9s)-5-[(e)-2-(4-chlorophenyl)vinyl]-11-(4-methylbenzoyl)-7,11-diazatricyclo[7.3.1.02,7]trideca-2,4-dien-6-one	3.57842e+06	962496	313487	960575	4.53194e+06	7.96177e+06
	13.78_436.18642	436.186	C26 H29 Cl N2 O2	(1r,9s)-5-[(e)-2-(4-chlorophenyl)vinyl]-11-(cyclohexylcarbonyl)-7,11-diazatricyclo[7.3.1.02,7]trideca-2,4-dien-6-one	4.45023e+06	3.25049e+06	1.49499e+06	1.00667e+06	1.97907e+06	2.68147e+06
	5.199_447.21082	447.211	C26 H29 N3 O4	(1s,3r,17s,19s)-3-hydroxy-9,9,16,16-tetramethyl-8-oxa-14,23,25-triazaheptacyclo[17.5.2.01,17 03,15 04,13 07,12 019,23]hexacosa-4,6,10,12,14-pentaene-24,26-dione	9.66742e+07	9.72685e+07	9.68641e+07	4.20901e+07	9.69505e+07	8.97628e+07
	11.036_504.34585	504.346	C30 H48 O6	(1α,2α,3β,5ξ,9ξ,18ξ)-1,2,3,19-tetrahydroxyurs-12-en-28-oic acid	2.3556e+06	1.55131e+08	9.02999e+06	1.14108e+07	1.06154e+07	1.32511e+07
	13.398_317.27360	317.274	C21 H35 N O	(2e,4e,9z)-1-(piperidin-1-yl)hexadeca-2,4,9-trien-1-one	3.71981e+06	4.17849e+06	5.62611e+06	1.77379e+06	4.13903e+06	4.09145e+06
	9.695_416.14650	416.147	C20 H26 O8	(2e,8s,10r)-10,11-dihydroxy-6-(methoxymethyl)-1,10-dimethyl-5-oxo-4,14-dioxatricyclo[9.2.1.03,7]tetradeca-2,6-dien-8-yl methacrylate	5.50294e+06	6.1069e+06	4.45366e+06	8.18892e+06	5.27055e+06	6.02151e+06
	7.454_464.18756	464.188	C25 H27 F N4 O5	(2r)-4-(3-fluorobenzoyl)-1-(4-methoxybenzoyl)-n-[(3s)-2-oxo-3-piperidinyl]-2-piperazinecarboxamide	1.80011e+07	1.90696e+07	2.17064e+07	3.91896e+06	1.93248e+07	1.81506e+07
	14.386_414.26194	414.262	C21 H36 N4 O3	(2r)-n-[(2s)-1-amino-3-cyclohexyl-1-oxo-2-propanyl]-1-(cyclohexylcarbonyl)-2-piperazinecarboxamide	1.59174e+06	1.72085e+06	1.78066e+06	2.53681e+07	2.73549e+06	3.22136e+06
	1.881_304.05797	304.058	C15 H12 O7	(2r,3r)-2-(2,6-dihydroxyphenyl)-3,5,7-trihydroxy-2,3-dihydro-4h-chromen-4-one	3.75702e+07	3.52425e+07	3.40183e+07	1.27754e+07	3.19998e+07	3.52923e+07
	14.633_390.23834	390.238	C19 H30 N6 O3	(2s,5as,8ar)-6-(1h-imidazol-2-ylmethyl)-1-methyl-2-[3-(4-morpholinyl)-3-oxopropyl]octahydropyrrolo[3,2-e][1,4]diazepin-5(2h)-one	2.81636e+06	3.0047e+06	2.06773e+06	7.28553e+06	3.5465e+06	2.83332e+06
	7.725_456.16366	456.164	C22 H31 Cl N4 O2	(2s,5as,8ar)-6-(3-chlorobenzyl)-1-methyl-2-[3-oxo-3-(1-pyrrolidinyl)propyl]octahydropyrrolo[3,2-e][1,4]diazepin-5(2h)-one	3.15197e+06	2.90999e+06	2.86165e+06	4.04906e+06	2.78575e+06	2.7061e+06
	5.58_264.13623	264.136	C15 H20 O4	(3ar,4as,5r,7as,8s,9ar)-5-hydroxy-4a,8-dimethyl-3-methyleneoctahydroazuleno[6,5-b]furan-2,6(3h,4h)-dione	1.15587e+08	1.08233e+08	1.08558e+08	1.47839e+08	1.02332e+08	1.07028e+08
	9.508_386.13669	386.137	C19 H24 O7	(3ar,4s,6r,11ar)-6,9-dihydroxy-6,10-dimethyl-3-methylene-2,7-dioxo-2,3,3a,4,5,6,7,8,9,11a-decahydrocyclodeca[b]furan-4-yl methacrylate	5.00375e+07	5.00463e+07	4.42294e+07	5.46741e+07	4.29225e+07	4.39976e+07
	13.784_334.21201	334.212	C20 H30 O4	(3e)-3-(hydroxymethyl)-2-oxo-5-[(1s,8as)-5,5,8a-trimethyl-2-methylenedecahydro-1-naphthalenyl]-3-pentenoic acid	4.94182e+07	3.49843e+07	1.17303e+07	8.5863e+07	2.17368e+07	3.1369e+07
	7.518_430.16064	430.161	C19 H28 N4 O5	(3r,4r)-3-{[4-(2-amino-2-oxoethoxy)benzoyl]amino}-4-hydroxy-n-isopropyl-1-azepanecarboxamide	7.45782e+07	7.27905e+07	7.74828e+07	5.42135e+07	7.26746e+07	7.61232e+07
	4.519_520.21428	520.214	C26 H34 N4 O5	(3r,4r)-4-hydroxy-3-({4-[2-(4-morpholinyl)ethoxy]benzoyl}amino)-n-phenyl-1-azepanecarboxamide	647698	497783	391671	5.63755e+06	354437	517754
	1.515_357.16152	357.162	C17 H25 N3 O4	(3r,4r)-n-ethyl-4-hydroxy-3-[(4-methoxybenzoyl)amino]-1-azepanecarboxamide	4.0805e+06	3.58197e+06	3.11834e+06	2.26981e+06	2.93804e+06	2.8024e+06
	7.303_240.06110	240.061	C11 H12 O6	(3r,4s)-4,6,8-trihydroxy-7-methoxy-3-methyl-3,4-dihydro-1h-isochromen-1-one	536663	480432	414114	4.21654e+06	407965	495279
	7.6_396.12440	396.124	C19 H17 F3 N4 O	(3s)-n-phenyl-3-[5-(trifluoromethyl)-1h-benzimidazol-2-yl]-1-pyrrolidinecarboxamide	2.48177e+06	1.54522e+06	1.60223e+06	1.95503e+06	1.64684e+06	1.70392e+06
	5.859_198.12585	198.126	C11 H20 O4	(3s,4r)-3-(1-hydroxyhexyl)-4-(hydroxymethyl)oxolan-2-one	3.81609e+06	3.47406e+06	2.95462e+06	1.09793e+07	1.65766e+06	2.5697e+06
	8.699_380.12605	380.126	C20 H22 O6	(3s,4r,8r,9e)-10-methyl-5-methylene-6,14-dioxo-7,13-dioxatricyclo[10.2.1.04,8]pentadeca-1(15),9-dien-3-yl (2z)-2-methyl-2-butenoate	548911	616475	656067	5.22862e+06	321341	530991
	8.683_344.12600	344.126	C19 H20 O6	(3s,6r,6as,7s)-6,6a,7,8-tetrahydroxy-3-methyl-2,3,4,5,6,6a,7,12a-octahydro-1,12-tetraphenedione	6.94016e+06	8.00048e+06	6.60179e+06	5.42923e+06	6.54927e+06	6.11207e+06
	19.886_334.15937	334.159	C17 H22 N2 O5	(4ar,7ar)-6-(1,3-benzodioxol-5-ylmethyl)-4-(2-methoxyethyl)hexahydropyrrolo[3,4-b][1,4]oxazin-3(2h)-one	2.93181e+06	3.70709e+06	3.36314e+06	1.6383e+06	4.82331e+06	3.96402e+06
	7.87_382.16055	382.161	C20 H24 N4 O5	(5-{[(2s)-2-{3-[2-(2-methoxyethoxy)-4-pyridinyl]-1,2,4-oxadiazol-5-yl}-1-pyrrolidinyl]methyl}-2-furyl)methanol	2.47483e+06	2.30532e+06	1.9018e+06	2.57799e+06	1.74384e+06	2.21392e+06
	6.739_248.10499	248.105	C14 H16 O4	(5r,6s)-5-hydroxy-4-methoxy-6-(2-phenylethyl)-5,6-dihydro-2h-pyran-2-one	3.10921e+06	3.36428e+06	3.03396e+06	7.25742e+06	3.04287e+06	3.36574e+06
	14.347_337.26166	337.262	C20 H32 O3	(5ξ,9ξ,16ξ)-17-hydroxykauran-19-oic acid	4.09185e+06	4.72745e+06	3.16106e+06	9.523e+06	3.61344e+06	6.14847e+06
	8.802_465.25797	465.258	C21 H36 O10	(6,6-dimethylbicyclo[3.1.1]hept-2-yl)methyl 6-o-[(2r,3r,4r)-3,4-dihydroxy-4-(hydroxymethyl)tetrahydro-2-furanyl]-β-d-glucopyranoside	5.70349e+07	5.44781e+07	4.73789e+07	5.85077e+07	4.13778e+07	4.36217e+07
	8.348_322.17559	322.176	C16 H28 O5	(6e)-10-heptyl-5,8,9-trihydroxy-3,4,5,8,9,10-hexahydro-2h-oxecin-2-one	2.3641e+06	1.78603e+06	1.33362e+06	9.5191e+06	1.24911e+06	2.15453e+06
	3.947_236.06854	236.069	C12 H12 O5	(7r,8s)-7,8-dihydroxy-3,7-dimethyl-6-oxo-7,8-dihydro-6h-isochromene-5-carbaldehyde	5.8342e+06	5.04897e+06	5.19592e+06	161454	5.02574e+06	4.63225e+06
	8.932_252.13383	252.134	C14 H20 O4	(8ar,12s,12ar)-12-hydroxy-4-methyl-4,5,6,7,8,8a,12,12a-octahydro-2h-3-benzoxecine-2,9(1h)-dione	1.48444e+06	1.48096e+06	734061	1.85945e+06	443834	943255
	5.772_260.10488	260.105	C15 H16 O4	(9ar,9bs)-9a-hydroxy-6,9-dimethyl-3-methylene-3,3a,4,5,9a,9b-hexahydroazuleno[4,5-b]furan-2,7-dione	1.74844e+06	1.47702e+06	1.58003e+06	2.63999e+06	1.48521e+06	1.65693e+06
	14.855_374.26448	374.264	C21 H34 N4 O2	[(2r,4s,5r)-5-(3-cyclopentyl-1-methyl-1h-pyrazol-5-yl)-1-azabicyclo[2.2.2]oct-2-yl]methyl isopropylcarbamate	737158	728394	481745	3.13419e+06	821143	660094
	5.019_440.16614	440.166	C21 H28 O10	[(3r,3ar,4s,9as,9br)-4-hydroxy-3,6-dimethyl-2,7-dioxo-2,3,3a,4,5,7,9a,9b-octahydroazuleno[4,5-b]furan-9-yl]methyl β-d-glucopyranoside	4.23501e+07	4.0724e+07	4.09191e+07	3.53527e+07	3.96216e+07	3.8869e+07
	2.259_492.14137	492.141	C23 H28 N2 O6 S2	[(3r,4s)-3-[(6,7-dimethoxy-3,4-dihydro-1-isoquinolinyl)methyl]-1-(2-thienylsulfonyl)-4-piperidinyl]acetic acid	6.72026e+06	4.39859e+06	5.46432e+06	9.38968e+06	3.29522e+06	4.10829e+06
	8.939_356.12598	356.126	C19 H18 N4 O2	[(3s)-3-(5-benzyl-1,3,4-oxadiazol-2-yl)-1-pyrrolidinyl](3-pyridinyl)methanone	6.37337e+06	6.18429e+06	4.46523e+06	6.73401e+06	5.34026e+06	5.8448e+06
	5.192_334.14170	334.142	C19 H18 N4 O2	[(3s)-3-(5-benzyl-1,3,4-oxadiazol-2-yl)-1-pyrrolidinyl](4-pyridinyl)methanone	7.50178e+06	7.02768e+06	6.46839e+06	3.87555e+06	6.19062e+06	7.26079e+06
	4.47_489.22178	489.222	C26 H30 F3 N3 O3	[1-(2-{[(1s,4s)-4-{3,5-dimethyl-1-[4-(trifluoromethyl)phenyl]-1h-pyrazol-4-yl}-2-cyclopenten-1-yl]amino}-2-oxoethyl)cyclopentyl]acetic acid	3.79505e+06	909272	142084	1.44488e+06	3.732e+06	8.26126e+06
	13.107_404.21761	404.218	C24 H28 N4 O2	[4-(2-methoxyphenyl)piperazino](1-phenyl-5-propyl-1h-pyrazol-4-yl)methanone	690245	727010	617392	2.16147e+06	1.05299e+06	723436
	5.145_405.20012	405.2	C18 H28 O9	{(1r,2r)-2-[(2z)-5-(hexopyranosyloxy)-2-penten-1-yl]-3-oxocyclopentyl}acetic acid	4.3843e+07	3.81132e+07	3.49963e+07	3.24419e+07	3.18125e+07	3.83342e+07
	19.621_530.26787	530.268	C32 H36 N4 O2	{(2r,4s,5r)-5-[1-methyl-3-(2-naphthyl)-1h-pyrazol-5-yl]-1-azabicyclo[2.2.2]oct-2-yl}methyl (4-isopropylphenyl)carbamate	1.21356e+07	7.8117e+06	2.1875e+06	1.21602e+06	2.78853e+06	5.68075e+06
	9.75_324.24126	324.241	C18 H32 N2 O3	{(3r,4s)-1-(cyclobutylcarbonyl)-3-[2-(diethylamino)ethyl]-4-piperidinyl}acetic acid	1.32631e+06	2.61815e+06	787924	1.4445e+06	1.03639e+06	1.51077e+06
	5.256_324.13212	324.132	C16 H16 N6 O2	{(3s)-3-[5-(1-methyl-1h-imidazol-5-yl)-1,3,4-oxadiazol-2-yl]-1-pyrrolidinyl}(4-pyridinyl)methanone	2.29202e+07	2.23431e+07	2.35907e+07	2.10688e+07	2.06391e+07	2.18832e+07
	5.968_278.16289	278.163	C15 H24 N2 O4	{3-[(3-{[4-(hydroxymethyl)cyclohexyl]amino}-3-oxetanyl)methyl]-1,2-oxazol-5-yl}methanol	6.07745e+06	6.99203e+06	6.40017e+06	1.35115e+06	2.95112e+07	2.02369e+07
	14.08_388.22265	388.223	C21 H34 O5	1-(3,5-dihydroxyphenyl)-12-hydroxy-2-tridecanyl acetate	1.81712e+06	2.16385e+06	1.34659e+06	3.51824e+06	2.77922e+06	2.10057e+06
	16.247_468.22335	468.223	C25 H30 N6 O2	1-(4-{5-[(2s)-1-(4-methylbenzyl)-2-pyrrolidinyl]-1,2,4-oxadiazol-3-yl}-2-pyridinyl)-4-piperidinecarboxamide	1.80128e+07	2.19784e+07	5.07671e+07	5.52663e+06	2.23743e+07	2.83052e+07
	13.671_488.27812	488.278	C27 H38 N4 O3	1-(4-acetyl-1-piperazinyl)-2-[(3r,4s)-3-({5-[4-(2-methyl-2-propanyl)phenyl]-1,2-oxazol-3-yl}methyl)-4-piperidinyl]ethanone	7.78416e+06	9.01188e+06	1.10343e+07	9.12791e+07	1.72855e+07	1.21248e+07
	16.991_468.24914	468.249	C24 H38 N4 O3	1-(4-acetyl-1-piperazinyl)-2-[(3r,4s)-3-{[5-(cyclohexylmethyl)-1,2-oxazol-3-yl]methyl}-4-piperidinyl]ethanone	7.07081e+06	6.75721e+06	7.37341e+06	8.36046e+07	1.22895e+07	9.14684e+06
	9.751_500.31445	500.314	C29 H42 N4 O2	1-(4-benzyl-1-piperazinyl)-2-[(3r,4s)-3-{[5-(cyclohexylmethyl)-1,2-oxazol-3-yl]methyl}-4-piperidinyl]ethanone	4.12432e+06	2.42466e+07	7.03963e+06	5.47879e+06	5.92227e+06	5.63527e+06
	6.738_463.14830	463.148	C24 H22 Cl N5 O3	1-(4-chlorophenyl)-3-[(1r,9s)-6-oxo-11-(3-pyridinylcarbonyl)-7,11-diazatricyclo[7.3.1.02,7]trideca-2,4-dien-5-yl]urea	3.09279e+06	2.82148e+06	2.6818e+06	1.08177e+06	4.13841e+06	4.04998e+06
	10.362_396.21504	396.215	C22 H28 N4 O3	1-(4-isobutylphenyl)-2-[4-(5-nitropyridin-2-yl)piperazino]propan-1-one	4.03124e+06	4.05438e+06	3.37266e+06	2.20381e+06	3.66688e+06	3.93822e+06
	4.432_450.20806	450.208	C23 H32 N4 O3	1-(4-methyl-1-piperazinyl)-2-[(3r,4s)-3-{[5-(phenoxymethyl)-1,2-oxazol-3-yl]methyl}-4-piperidinyl]ethanone	1.98722e+06	1.66302e+06	1.54387e+06	2.03127e+06	1.92415e+06	2.05077e+06
	6.788_398.13423	398.134	C18 H21 F3 N4 O S	1-(phenylthio)-3-{4-[4-(trifluoromethyl)pyrimidin-2-yl]piperazino}propan-2-ol	7.7229e+06	7.75576e+06	1.09347e+07	7.83933e+06	8.94735e+06	7.87502e+06
	2.694_415.14571	415.146	C20 H22 Cl N5 O3	1-(tert-butyl)-n'-{[3-(2-chlorophenyl)-5-methylisoxazol-4-yl]carbonyl}-5-methyl-1h-pyrazole-3-carbohydrazide	1.84143e+06	2.5844e+06	2.48897e+06	3.14345e+06	1.46155e+06	1.43471e+06
	8.348_246.16207	246.162	C12 H18 N6	1,3,5-trimethyl-4-[2-(1,3,5-trimethyl-1h-pyrazol-4-yl)diaz-1-enyl]-1h-pyrazole	4.05539e+06	2.80114e+06	1.92526e+06	9.9551e+06	1.73736e+06	3.53979e+06
	22.906_783.51823	783.518	C48 H69 N3 O6	1,3,5-tris(3,5-di-tert-butyl-4-hydroxybenzyl)-1,3,5-triazine-2,4,6(1h,3h,5h)-trione	1.29907e+08	1.64974e+08	1.62163e+08	1.06177e+08	1.93144e+08	1.95645e+08
	6.818_400.14992	400.15	C20 H26 O7	1,3-dihydroxy-1-(7-methoxy-2-oxo-2h-chromen-6-yl)-3-methyl-2-butanyl 3-methylbutanoate	6.45652e+07	5.81783e+07	7.2034e+07	4.99699e+07	7.00286e+07	6.55406e+07
	2.045_420.16062	420.161	C23 H21 F N4 O3	1,4:3,6-dianhydro-2-(benzoylamino)-2,5-dideoxy-5-{[4-(3-fluorophenyl)-2-pyrimidinyl]amino}-l-iditol	7.47689e+06	6.84741e+06	7.74927e+06	6.41123e+06	6.2936e+06	5.77605e+06
	2.79_430.16656	430.167	C21 H23 F N4 O5	1,4:3,6-dianhydro-2-[(4-carboxybutanoyl)amino]-2,5-dideoxy-5-{[4-(3-fluorophenyl)-2-pyrimidinyl]amino}-l-iditol	5.76426e+06	5.20529e+06	4.5922e+06	8.73115e+06	9.2955e+06	4.31555e+06
	10.505_384.16002	384.16	C20 H21 F N4 O3	1,4:3,6-dianhydro-2-[(cyclopropylcarbonyl)amino]-2,5-dideoxy-5-{[4-(3-fluorophenyl)-2-pyrimidinyl]amino}-l-iditol	1.05372e+07	8.13972e+06	8.76073e+06	7.83952e+06	9.13782e+06	1.25725e+07
	7.517_414.18685	414.187	C21 H26 N4 O5	1,4:3,6-dianhydro-2-deoxy-5-o-[2-(dimethylamino)-2-oxoethyl]-2-{[4-(4-methoxyphenyl)-2-pyrimidinyl]amino}-d-glucitol	2.11931e+07	2.02116e+07	2.04714e+07	1.31936e+07	1.94619e+07	2.09923e+07
	7.426_332.19874	332.199	C20 H28 O4	1,4a-dimethyl-6-methylene-5-[2-(2-oxo-2,5-dihydro-3-furanyl)ethyl]decahydro-1-naphthalenecarboxylic acid	1.16515e+07	1.2512e+07	1.06064e+07	1.49925e+06	1.58047e+07	1.67173e+07
	5.726_452.12984	452.13	C19 H26 O11	1,5-anhydro-2-o-(6-o-benzoyl-α-l-galactopyranosyl)-d-glucitol	6.68782e+06	7.03249e+06	6.88053e+06	1.76541e+06	6.62723e+06	7.20113e+06
	7.518_390.16787	390.168	C21 H24 O6	1,5-bis(2,5-dimethoxyphenyl)pentane-1,5-dione	5.07233e+06	4.50038e+06	4.21696e+06	3.55238e+06	4.54294e+06	4.79447e+06
	3.768_158.08467	158.085	C10 H10 N2	1,5-naphthalenediamine	1.19507e+07	1.20706e+07	4.56468e+07	1.12974e+07	1.1112e+07	1.00093e+07
	8.931_230.15197	230.152	C12 H22 O4	1,6-hexanediol diglycidyl ether	2.71748e+06	2.64496e+06	1.54353e+06	3.3346e+06	895737	1.81754e+06
	4.731_498.17209	498.172	C26 H25 F N4 O4	1-[(1r,9s)-11-(4-fluorobenzoyl)-6-oxo-7,11-diazatricyclo[7.3.1.02,7]trideca-2,4-dien-5-yl]-3-(2-methoxyphenyl)urea	1.06652e+07	7.37178e+06	1.13193e+07	2.3658e+06	1.12346e+07	1.08948e+07
	8.937_388.15230	388.152	C20 H22 N4 O3	1-[(1r,9s)-11-acetyl-6-oxo-7,11-diazatricyclo[7.3.1.02,7]trideca-2,4-dien-5-yl]-3-phenylurea	1.72623e+06	1.60851e+06	1.69942e+06	2.12168e+06	1.92508e+06	1.54861e+06
	4.558_496.15633	496.156	C26 H26 N4 O4	1-[(1r,9s)-11-benzoyl-6-oxo-7,11-diazatricyclo[7.3.1.02,7]trideca-2,4-dien-5-yl]-3-(2-methoxyphenyl)urea	4.354e+06	4.18414e+06	5.81124e+06	2.52198e+06	5.38925e+06	4.77318e+06
	6.49_347.18437	347.184	C18 H25 N3 O4	1-[(1s,2s,3s,4r,5r)-3-hydroxy-4-(1-piperidinyl)-6,8-dioxabicyclo[3.2.1]oct-2-yl]-3-phenylurea	2.60293e+06	2.13973e+06	1.8107e+06	2.95646e+06	1.05403e+06	1.36948e+06
	7.455_480.16121	480.161	C20 H25 F3 N4 O5	1-[(1s,2s,3s,4r,5r)-4-(4-acetyl-1-piperazinyl)-3-hydroxy-6,8-dioxabicyclo[3.2.1]oct-2-yl]-3-[3-(trifluoromethyl)phenyl]urea	9.92527e+07	1.0378e+08	1.2702e+08	2.07735e+07	1.08405e+08	1.03047e+08
	7.046_365.19509	365.195	C18 H27 N3 O5	1-[(1s,2s,3s,4r,5r)-4-(diethylamino)-3-hydroxy-6,8-dioxabicyclo[3.2.1]oct-2-yl]-3-(4-methoxyphenyl)urea	4.00357e+06	4.01543e+06	4.52671e+06	1.54131e+06	6.31155e+06	6.05156e+06
	6.046_254.11548	254.115	C13 H18 O5	1-[2,4-dihydroxy-3-(2-hydroxyethyl)-6-methoxyphenyl]-1-butanone	1.14408e+07	1.19997e+07	1.17184e+07	3.27987e+06	1.11759e+07	1.174e+07
	7.426_460.17147	460.171	C22 H26 N6 O2 S	1-[4-(4-{5-[(2s)-1-(2-thienylmethyl)-2-pyrrolidinyl]-1,2,4-oxadiazol-3-yl}-2-pyridinyl)-1-piperazinyl]ethanone	2.24372e+06	1.64147e+06	1.24988e+06	2.12825e+06	1.60602e+06	1.8227e+06
	13.571_445.24673	445.247	C26 H31 N5 O2	1-{[(1s,4s,6s)-6-isopropyl-3-methyl-4-{[5-(4-pyridinyl)-1,3,4-oxadiazol-2-yl]methyl}-2-cyclohexen-1-yl]methyl}-3-phenylurea	1.27294e+07	1.23515e+07	1.21002e+07	5.53585e+06	1.20925e+07	1.22495e+07
	5.763_303.15828	303.158	C16 H23 N3 O4	1-{4-[(2r,3r)-3-(hydroxymethyl)-4-methyl-5-oxo-2-morpholinyl]phenyl}-3-isopropylurea	1.58167e+06	1.58457e+06	1.1185e+06	412807	7.69556e+06	6.76959e+06
	6.947_453.17917	453.179	C21 H29 N5 O4	1-{4-[(2s)-2-{3-[6-(2-methoxyethoxy)-3-pyridinyl]-1,2,4-oxadiazol-5-yl}-1-pyrrolidinyl]-1-piperidinyl}ethanone	3.51184e+06	2.98512e+06	2.69285e+06	1.49341e+06	3.00722e+06	2.91261e+06
	11.412_328.13103	328.131	C16 H24 O5 S	10-(4-sulfophenyl) decanoic acid	613703	525953	434622	1.17392e+06	325581	470434
	16.518_186.12590	186.126	C10 H18 O3	10-hda	1.81914e+06	1.4507e+06	936430	3.77655e+06	1.0621e+06	1.52581e+06
	6.839_188.14148	188.141	C10 H20 O3	10-Hydroxydecanoic acid	755781	691226	691421	845019	701045	757277
	12.992_327.24099	327.241	C18 H33 N O4	10-nitrooleate	7.25827e+06	8.95479e+06	3.62252e+06	9.04944e+06	4.70617e+06	6.453e+06
	18.898_306.25572	306.256	C20 H34 O2	11(z),14(z),17(z)-eicosatrienoic acid	2.23895e+06	1.83265e+06	1.37052e+06	327135	630746	902211
	15.102_306.21947	306.219	C19 H30 O3	11β-hydroxyandrosterone	3.91139e+06	4.55505e+06	3.23312e+06	1.07045e+07	8.67591e+06	5.61686e+06
	15.409_292.20387	292.204	C18 H28 O3	12-oxo phytodienoic acid	9.77955e+07	1.76486e+08	7.48947e+07	6.66685e+07	8.31855e+07	1.09354e+08
	7.446_282.18313	282.183	C16 H28 O5	13,14-dihydro-15-keto-tetranor prostaglandin f1α	1.47087e+07	1.37747e+07	9.94001e+06	2.33668e+07	6.36481e+06	1.17648e+07
	14.9_316.20143	316.201	C18 H30 O3	13-oxoode	5.73585e+06	8.27149e+06	3.31379e+06	4.06981e+06	4.12494e+06	3.79668e+06
	14.856_390.23834	390.238	C23 H34 O5	15-deoxy-δ12,14-prostaglandin j2-2-glycerol ester	1.00634e+07	9.54022e+06	7.49019e+06	3.61204e+07	1.06911e+07	8.99357e+06
	15.722_318.21670	318.217	C20 H32 O4	15-epi prostaglandin a1	1.44836e+07	1.44296e+07	7.91733e+06	1.43204e+07	9.49302e+06	1.39616e+07
	13.038_334.21200	334.212	C20 H32 O5	15-keto prostaglandin e1	1.18737e+07	2.07554e+07	5.25936e+06	2.19877e+07	7.77823e+06	8.36455e+06
	15.715_322.25026	322.25	C20 H34 O3	15-oxoede	3.43174e+06	2.78398e+06	2.07894e+06	1.99781e+06	844290	1.66018e+06
	17.816_306.21946	306.219	C17 H32 O3	16-heptadecyne-1,2,4-triol	2.11254e+07	4.15061e+07	2.3549e+07	3.99592e+07	3.79723e+07	3.19736e+07
	12.863_319.25109	319.251	C20 H33 N O2	17α-methyl-androstan-3-hydroxyimine-17β-ol	1.316e+06	1.14716e+06	835248	2.8223e+06	993087	1.47204e+06
	12.671_315.21979	315.22	C20 H29 N O2	17β-hydroxy-androstano[3,2-c]isoxazole	2.20687e+06	1.41388e+06	794772	1.16631e+06	7.66154e+06	4.25526e+06
	12.495_470.34008	470.34	C30 H46 O4	18-β-glycyrrhetinic acid	1.94247e+07	6.307e+08	4.40509e+07	7.68206e+07	5.16389e+07	7.64139e+07
	18.159_253.24063	253.241	C16 H31 N O	1-dodecyl-2-pyrrolidinone	1.44712e+08	1.54629e+08	1.41314e+08	6.63205e+07	1.71257e+08	1.62381e+08
	18.51_354.27705	354.277	C21 H38 O4	1-linoleoyl glycerol	1.37045e+08	1.35103e+08	1.51223e+08	2.742e+08	2.77706e+08	1.98023e+08
	10.504_368.19670	368.197	C24 H24 N4	1-methyl-2-{(3s)-1-[4-(2-pyridinyl)benzyl]-3-pyrrolidinyl}-1h-benzimidazole	1.82332e+07	1.5321e+07	8.53266e+06	1.77359e+07	1.32831e+07	1.65233e+07
	21.715_358.30829	358.308	C21 H42 O4	1-stearoylglycerol	2.11475e+08	2.39614e+08	2.3303e+08	2.10643e+08	2.57823e+08	2.87442e+08
	6.599_488.24518	488.245	C28 H32 N4 O4	2-({[4-(benzyloxy)anilino]carbonyl}amino)-n-(3-morpholinopropyl)benzamide	1.73291e+06	1.72548e+06	1.62954e+06	3.60528e+06	1.59729e+06	1.53884e+06
	6.685_307.12674	307.127	C16 H21 N O3 S	2-(1-{2-[3-(methylthio)anilino]-2-oxoethyl}cyclopentyl)acetic acid	1.93788e+06	1.75922e+06	1.70587e+06	1.76146e+06	1.95253e+06	1.77873e+06
	18.773_376.25884	376.259	C23 H38 O5	2-(14,15-epoxyeicosatrienoyl) glycerol	7.4997e+06	7.70933e+06	9.04199e+06	3.5965e+06	9.67025e+06	9.03089e+06
	6.038_246.14675	246.147	C15 H16 N4 O	2-(1-ethyl-3-methyl-1h-pyrazol-5-yl)-5-(4-methylphenyl)-1,3,4-oxadiazole	2.6904e+06	2.51132e+06	1.62561e+06	1.00131e+07	1.05584e+06	1.51521e+06
	5.121_417.16129	417.161	C21 H19 N7 O3	2-(1h-imidazol-1-yl)-5-{5-[(2s)-1-(4-nitrobenzyl)-2-pyrrolidinyl]-1,2,4-oxadiazol-3-yl}pyridine	1.16648e+07	1.42617e+07	1.36825e+07	2.49823e+07	1.06061e+07	1.05556e+07
	4.199_245.10526	245.105	C14 H15 N O3	2-(3,3-dimethyl-2-oxobutyl)-1h-isoindole-1,3(2h)-dione	6.44873e+06	6.61025e+06	1.05018e+07	720477	4.69284e+06	4.45527e+06
	4.053_440.09335	440.093	C22 H18 N4 O3 S	2-(3-pyridinylcarbonyl)-8-(2-thienyl)-1,3,4,12a-tetrahydropyrazino[2,1-c][1,4]benzodiazepine-6,12(2h,11h)-dione	7.41316e+06	8.18527e+06	8.22082e+06	5.10416e+06	8.01633e+06	7.18864e+06
	2.477_325.17376	325.174	C19 H23 N3 O2	2-(4-methylpiperazino)-n-(2-phenoxyphenyl)acetamide	5.08282e+06	5.87143e+06	3.7361e+06	1.3084e+07	4.57655e+06	4.48925e+06
	4.168_262.13518	262.135	C17 H20 O	2-(cyclohexylmethylidene)-1,2,3,4-tetrahydronaphthalen-1-one	626583	746094	587552	117028	4.59191e+06	4.79845e+06
	4.699_348.08204	348.082	C18 H18 Cl2 N2 O	2-(tert-butyl)-8-[(3,4-dichlorobenzyl)oxy]imidazo[1,2-a]pyridine	1.96254e+07	5.24095e+06	2.45966e+07	1.59346e+07	2.25315e+07	2.31386e+07
	13.863_390.25945	390.259	C25 H36 O2	2,2-methylenebis(4-ethyl-6-tert-butylphenol)	164569	172258	115262	875661	260425	161804
	12.918_268.16753	268.168	C16 H20 N4	2,3-dicyanospiro[cyclohexane-1,5'-cyclohexano[1,2-e]diazepine]	1.99452e+06	2.12753e+06	1.88997e+06	9.86873e+06	3.05796e+06	2.37866e+06
	2.505_302.09780	302.098	C14 H14 N4 O4	2,3-dimethoxybenzaldehyde 1-(3-nitro-2-pyridyl)hydrazone	3.32756e+06	3.14312e+06	4.37237e+06	1.21171e+07	3.25801e+06	3.52924e+06
	13.509_343.23592	343.236	C18 H30 O5	2,3-dinor-11β-prostaglandin f2α	1.45052e+06	2.13252e+06	1.09116e+06	870249	959436	1.26656e+06
	11.744_308.19876	308.199	C18 H30 O5	2,3-dinor-8-epi-prostaglandin f2α	1.52726e+07	9.33921e+06	3.0833e+06	3.31194e+07	6.109e+06	1.12647e+07
	13.573_134.07310	134.073	C9 H10 O	2,4-dimethylbenzaldehyde	8.86236e+06	8.29113e+06	7.43863e+06	3.16485e+06	8.08401e+06	7.98994e+06
	4.964_473.21146	473.211	C24 H29 N5 O4	2,5-anhydro-6-[(1h-benzimidazol-5-ylcarbonyl)amino]-4,6-dideoxy-4-(4-phenyl-1-piperazinyl)-d-galactitol	2.38571e+06	2.44924e+06	2.17633e+06	1.39201e+07	2.10509e+06	2.32101e+06
	7.311_416.08971	416.09	C20 H20 N2 O4 S2	2,5-dimethoxy-n-{2-[(4-methylphenyl)thio]pyridin-3-yl}benzenesulfonamide	2.20601e+06	2.15718e+06	1.76495e+06	5.65502e+06	1.69629e+06	1.97154e+06
	5.218_213.07913	213.079	C13 H14 N2 O2	2,6-dimethyl-5-(4-methylphenoxy)pyrimidin-4-ol	2.66933e+07	2.97919e+07	1.63398e+07	2.57192e+06	1.31218e+07	1.87992e+07
	9.997_220.14714	220.147	C14 H20 O2	2,6-di-tert-butyl-1,4-benzoquinone	1.22203e+06	846882	350508	7.65942e+06	543051	1.3676e+06
	9.293_477.25796	477.258	C25 H39 N3 O4 S	2-[(1s,4s,5s)-5-isopropyl-2-methyl-4-{[(phenylsulfonyl)amino]methyl}-2-cyclohexen-1-yl]-n-[2-(4-morpholinyl)ethyl]acetamide	3.90107e+06	5.62735e+06	5.69556e+06	1.62107e+06	5.43719e+06	5.18925e+06
	1.636_422.11923	422.119	C20 H21 F N4 O2 S	2-[(3r,4s)-3-{[5-(4-fluorophenyl)-1,2-oxazol-3-yl]methyl}-4-piperidinyl]-n-(1,3-thiazol-2-yl)acetamide	3.41659e+06	2.49681e+06	2.58008e+06	5.82737e+06	3.18296e+06	2.84215e+06
	9.914_432.25153	432.252	C24 H34 N4 O2	2-[(3r,4s)-3-{[5-(cyclohexylmethyl)-1,2-oxazol-3-yl]methyl}-4-piperidinyl]-n-(3-pyridinylmethyl)acetamide	2.23294e+06	2.00048e+06	1.08785e+06	1.89047e+06	1.31126e+06	1.57463e+06
	13.572_420.21295	420.213	C24 H28 N4 O3	2-[(3r,4s)-3-{[5-(phenoxymethyl)-1,2-oxazol-3-yl]methyl}-4-piperidinyl]-n-(3-pyridinylmethyl)acetamide	4.33376e+06	4.32736e+06	3.96135e+06	1.63803e+06	4.06394e+06	3.86837e+06
	10.659_309.19397	309.194	C18 H23 N5	2-[(3s)-1-(1-methyl-4-piperidinyl)-3-pyrrolidinyl]-1h-benzimidazole-5-carbonitrile	4.17171e+06	3.74102e+06	4.35743e+06	1.7068e+06	2.21577e+06	2.83439e+06
	5.471_324.13210	324.132	C19 H20 N2 O S	2-[(3s)-1-(3-methoxybenzyl)-3-pyrrolidinyl]-1,3-benzothiazole	1.32374e+07	1.27777e+07	1.28677e+07	2.10627e+07	1.09149e+07	1.09744e+07
	2.396_294.12155	294.122	C18 H18 N2 S	2-[(3s)-1-benzyl-3-pyrrolidinyl]-1,3-benzothiazole	4.52868e+06	3.3491e+06	5.17958e+06	827147	2.61098e+07	1.25603e+07
	3.427_382.08765	382.088	C20 H18 N2 O2 S2	2-{[4-amino-5-(4-methylbenzoyl)-1,3-thiazol-2-yl]thio}-1-(4-methylphenyl)ethan-1-one	9.82086e+06	8.36407e+06	6.57146e+06	1.26313e+07	1.05447e+07	7.07764e+06
	4.128_266.12668	266.127	C13 H18 N2 O4	2-{2-oxo-2-[4-(1h-pyrrol-1-yl)piperidino]ethoxy}acetic acid	2.414e+06	2.41552e+06	2.09109e+06	485824	9.44915e+06	6.46345e+06
	5.572_370.18164	370.182	C18 H22 N6 O3	2-{5-[(2s)-1-(1h-imidazol-2-ylmethyl)-2-pyrrolidinyl]-1,2,4-oxadiazol-3-yl}-4-(2-methoxyethoxy)pyridine	2.82878e+06	2.22337e+06	2.73481e+06	994675	2.248e+06	2.5509e+06
	11.907_364.22256	364.223	C21 H32 O5	20 β-dihydrocortisol	2.00996e+06	4.23426e+06	3.07129e+06	5.58748e+06	2.87874e+06	2.26147e+06
	20.944_482.37401	482.374	C30 H52 O3	20(S)-Protopanaxadiol	2.35046e+06	2.21669e+06	1.42675e+06	3.75477e+06	1.65334e+06	2.1925e+06
	13.012_150.10474	150.105	C10 H14 O	2-Adamantanone	1.36728e+06	1.27944e+06	690482	1.81873e+06	822871	1.27051e+06
	16.105_317.29296	317.293	C18 H39 N O3	2-amino-1,3,4-octadecanetriol	2.50154e+07	2.79839e+07	2.20493e+07	1.7569e+07	2.32877e+07	2.17253e+07
	15.949_297.26671	297.267	C18 H35 N O2	2-aminooctadec-4-yne-1,3-diol	1.38227e+08	1.55332e+08	1.57065e+08	1.20392e+08	1.88706e+08	1.6084e+08
	1.886_189.10013	189.1	C8 H15 N O4	2-aminooctanedioic acid	2.79566e+06	2.70045e+06	2.39131e+06	3.59016e+06	2.52662e+06	2.67529e+06
	6.891_312.14736	312.147	C18 H20 N2 O3	2-ethoxy-2'-ethyloxanilide	1.57035e+06	1.98028e+06	1.46989e+06	517198	7.89524e+06	6.83384e+06
	14.408_334.21218	334.212	C20 H30 O4	2-hydroxy-4,5',8a'-trimethyl-1'-oxo-4-vinyloctahydro-1'h-spiro[cyclopentane-1,2'-naphthalene]-5'-carboxylic acid	1.43633e+06	1.51209e+06	932733	2.0995e+06	1.46655e+06	1.64471e+06
	8.938_152.04753	152.048	C8 H8 O3	2-Hydroxy-4-methoxybenzaldehyde	611355	569568	533669	905229	602247	551505
	1.119_164.04751	164.048	C9 H8 O3	2-hydroxycinnamic acid	3.65316e+08	3.74205e+08	4.27695e+08	2.98096e+08	3.0646e+08	2.77272e+08
	13.566_336.26641	336.266	C21 H38 O4	2-linoleoyl glycerol	936856	1.36046e+06	740298	2.84682e+06	1.61011e+06	906989
	11.539_323.20965	323.21	C18 H29 N O4	2-methoxy-n-[(3s,3as,8s,9s,9as,9bs)-3,5a,9-trimethyl-2-oxododecahydronaphtho[1,2-b]furan-8-yl]acetamide	4.07916e+07	3.43729e+07	3.62707e+07	2.07742e+07	1.93167e+07	2.64725e+07
	4.698_126.06826	126.068	C7 H10 O2	2-methylcyclohexan-1,3-dione	3.11395e+06	2.77439e+06	2.7494e+06	2.26611e+06	2.74528e+06	2.57059e+06
	4.709_144.05775	144.058	C10 H8 O	2-Naphthol	9.36282e+06	8.51226e+06	8.55847e+06	7.09537e+06	8.18541e+06	8.62126e+06
	6.742_616.10629	616.106	C28 H24 O16	2'-O-Galloylhyperin	1.73521e+08	1.67702e+08	1.88751e+08	2.24633e+07	2.15649e+08	1.78564e+08
	1.585_281.11238	281.112	C11 H15 N5 O4	2'-o-methyladenosine	2.72917e+07	2.30701e+07	2.34139e+07	6.55519e+06	1.06846e+07	1.49645e+07
	2.046_456.12435	456.124	C20 H24 O12	2-oxo-2h-chromen-7-yl 6-o-β-d-xylopyranosyl-β-d-glucopyranoside	7.88957e+07	8.83902e+07	1.20849e+08	2.46718e+07	8.9137e+07	5.62886e+07
	7.516_445.19519	445.195	C20 H28 O10	2-phenylethyl 3-o-(4-carboxy-3-hydroxy-3-methylbutanoyl)-β-d-glucopyranoside	4.92991e+06	3.63178e+06	3.5716e+06	399049	3.70453e+06	5.324e+06
	5.714_399.15315	399.153	C21 H20 F N5 O	3-({(2s)-2-[3-(5-fluoro-2-pyridinyl)-1,2,4-oxadiazol-5-yl]-1-pyrrolidinyl}methyl)-1-methyl-1h-indole	1.38964e+06	1.30725e+06	1.21487e+06	2.46188e+06	942136	1.02165e+06
	7.267_392.10841	392.108	C18 H18 Cl F N4 O3	3-({[1-(2-chloro-6-fluorobenzyl)-4-piperidinyl]amino}carbonyl)-2-pyrazinecarboxylic acid	1.1357e+07	1.34345e+07	1.37226e+07	574976	1.14857e+07	1.21302e+07
	5.907_180.07889	180.079	C10 H12 O3	3-(3-Methoxyphenyl)propionic acid	2.19753e+06	1.68883e+06	1.71422e+06	2.17673e+06	1.64123e+06	4.0085e+06
	4.71_190.06325	190.063	C11 H10 O3	3-(4-methylbenzoyl)acrylic acid	1.78029e+07	1.73748e+07	1.66348e+07	1.36803e+07	1.61586e+07	1.60481e+07
	1.417_304.16356	304.164	C18 H24 O4	3,12-dihydroxy-13-methoxypodocarpa-8,11,13-trien-7-one	1.45969e+06	1.35935e+06	1.04132e+06	2.58109e+06	1.02459e+06	1.23132e+06
	10.693_320.15987	320.16	C16 H26 O5	3,14-dihydro-15-keto-tetranor prostaglandin e2	795458	812973	635392	1.40711e+06	1.07288e+06	820827
	4.964_500.15336	500.153	C20 H30 O13	3,4,5-trimethoxyphenyl 6-o-pentopyranosyl-β-d-glucopyranoside	2.19214e+06	2.73105e+06	3.97221e+06	4.53518e+06	4.19403e+06	3.65742e+06
	2.449_138.03188	138.032	C7 H6 O3	3,4-dihydroxybenzaldehyde	1.55604e+08	1.76357e+08	1.40888e+08	4.19046e+07	1.34165e+08	1.41454e+08
	9.63_199.08614	199.086	C9 H10 O4	3,4-dihydroxyphenylpropionic acid	2.50535e+06	1.89956e+06	1.10466e+06	83029.6	105612	946000
	9.546_180.07889	180.079	C10 H12 O3	3',4'-dimethoxyacetophenone	1.85255e+06	1.85649e+06	1.62666e+06	1.30866e+06	1.69854e+06	1.82562e+06
	2.565_465.18512	465.185	C19 H28 O12	3,4-dimethoxyphenyl 6-o-pentopyranosylhexopyranoside	1.12146e+07	9.98267e+06	1.58557e+07	4.46615e+06	1.00217e+07	1.10046e+07
	2.032_472.09849	472.098	C21 H22 O11	3,5-dihydroxy-2-(4-hydroxyphenyl)-4-oxo-3,4-dihydro-2h-chromen-7-yl hexopyranoside	1.26151e+07	1.32891e+07	1.8324e+07	9.08198e+06	1.5163e+07	1.48843e+07
	6.529_204.04249	204.042	C11 H8 O4	3,5-dihydroxy-2-naphthoic acid	4.38518e+06	4.29148e+06	3.62177e+06	8.5335e+06	3.61532e+06	3.39738e+06
	8.63_182.05818	182.058	C9 H10 O4	3,5-Dimethoxy-4-hydroxybenzaldehyde	1.37981e+06	1.38681e+06	1.42096e+06	1.05296e+06	1.48079e+06	1.42645e+06
	9.244_338.11541	338.115	C20 H18 O5	3',6'-dimethoxy-1,1':4',1''-terphenyl-2',4,4''-triol	5.90438e+06	5.71846e+06	5.41485e+06	6.22121e+06	4.74175e+06	5.3343e+06
	7.086_726.20013	726.2	C32 H38 O19	3-{[3-o-(β-d-glucopyranosyl)-α-l-arabinofuranosyl]oxy}-5-hydroxy-2-(4-hydroxyphenyl)-4-oxo-4h-chromen-7-yl 6-deoxy-α-l-mannopyranoside	7.97493e+06	8.07015e+06	8.07527e+06	1.89831e+06	7.56674e+06	7.92073e+06
	11.069_408.21257	408.213	C21 H30 N4 O3	3-{5-[(2s)-1-(cyclohexylmethyl)-2-pyrrolidinyl]-1,2,4-oxadiazol-3-yl}-2-(2-methoxyethoxy)pyridine	33921	90574.4	15844.3	1.66999e+06	50462.1	52257
	1.602_374.17985	374.18	C24 H23 F N2 O	3-fluoro nnei	2.85225e+06	2.27056e+06	3.94235e+06	347741	1.58574e+07	1.17473e+07
	5.66_386.19416	386.194	C19 H30 O8	3-hydroxy-3,5,5-trimethyl-4-(3-oxo-1-buten-1-ylidene)cyclohexyl β-d-glucopyranoside	5.68729e+06	6.86143e+06	6.69662e+06	1.22251e+07	4.84783e+06	3.79129e+06
	9.698_384.12098	384.121	C21 H20 O7	3-hydroxy-7,14-dimethoxy-17-methyl-12,16,21-trioxapentacyclo[15.3.1.02,15 04,13 06,11]henicosa-2(15),3,6,8,10,13-hexaen-5-one	5.75665e+06	5.40024e+06	4.86316e+06	8.58217e+06	4.93994e+06	6.05835e+06
	6.352_164.04752	164.048	C9 H8 O3	3-Hydroxycinnamic acid	4.55576e+06	4.00972e+06	4.18521e+06	6.12465e+06	4.73009e+06	5.09166e+06
	12.709_408.24897	408.249	C21 H38 O6	3-methoxy prostaglandin f1α	4.67897e+06	3.80509e+06	2.99135e+06	2.02154e+07	4.67691e+06	3.94029e+06
	8.221_136.05252	136.053	C8 H8 O2	3-methoxybenzaldehyde	7.9047e+06	8.22183e+06	7.5631e+06	7.62847e+06	7.2323e+06	7.45282e+06
	6.074_160.05266	160.053	C10 H10 O3	3-methoxycinnamic acid	3.20365e+06	2.49728e+06	2.30846e+06	2.45832e+06	2.40037e+06	1.93012e+06
	7.422_504.14293	504.143	C24 H26 N4 O5 S	3-methoxy-n-[(1r,9r)-6-oxo-11-(8-quinolinylsulfonyl)-7,11-diazatricyclo[7.3.1.02,7]trideca-2,4-dien-5-yl]propanamide	634383	704688	753657	4.54647e+06	800324	789307
	1.432_160.06388	160.064	C9 H8 N2 O	3-methyl-2-quinoxalinol	3.47638e+07	3.42992e+07	3.32875e+07	3.88439e+07	3.38681e+07	3.61997e+07
	17.428_348.26647	348.266	C22 H36 O3	3-methyl-5-(5,5,8a-trimethyl-2-methylene-7-oxodecahydro-1-naphthalenyl)pentyl acetate	459759	640126	572571	2.1703e+06	510653	455165
	4.103_236.11621	236.116	C12 H16 N2 O3	3-morpholino-4-tetrahydro-1h-pyrrol-1-ylcyclobut-3-ene-1,2-dione	1.61659e+06	1.86229e+06	1.73607e+06	463958	7.1451e+06	4.53453e+06
	2.424_304.06960	304.07	C15 H16 N2 O S2	4-(1,3-dithian-2-yliden)-3-methyl-1-(4-methylphenyl)-4,5-dihydro-1h-pyrazol-5-one	2.57751e+07	2.12615e+07	2.54356e+07	1.39552e+07	1.15132e+07	1.84312e+07
	7.441_136.05251	136.053	C8 H8 O2	4-(2-Furyl)-3-buten-2-one	2.61217e+06	3.03485e+06	3.09925e+06	3.25409e+06	2.34831e+06	2.21044e+06
	2.98_330.13148	330.131	C15 H22 O8	4-(2-hydroxyethyl)-2-methoxyphenyl β-d-glucopyranoside	1.35231e+07	6.99945e+06	4.85745e+06	3.04044e+07	1.01783e+07	1.25494e+07
	5.794_477.22156	477.222	C21 H32 O11	4-(4-hydroxyphenyl)-2-butanyl 6-o-[(4ξ)-α-l-threo-pentofuranosyl]-β-d-glucopyranoside	1.72785e+06	1.52299e+06	1.61722e+06	2.00988e+06	1.82378e+06	1.61354e+06
	6.545_610.15311	610.153	C27 H30 O16	4-(5,7-dihydroxy-4-oxo-4h-chromen-2-yl)-2-(β-d-glucopyranosyloxy)phenyl β-d-glucopyranoside	1.63631e+08	1.48241e+08	1.81197e+08	7.5547e+07	1.74088e+08	1.79484e+08
	2.263_225.11897	225.119	C15 H15 N O	4-(dimethylamino)benzophenone	3.44819e+07	3.17107e+07	3.10755e+07	3.17875e+07	2.81347e+07	2.83327e+07
	2.341_383.10782	383.108	C19 H17 N3 O6	4-[(dimethylamino)methylidene]-2-[2-(4-methoxyphenoxy)-5-nitrophenyl]-4,5-dihydro-1,3-oxazol-5-one	1.16478e+08	1.10999e+08	1.05443e+08	2.80505e+07	5.4555e+07	5.7875e+07
	7.075_396.15740	396.157	C21 H26 O6	4-[2-(4-allyl-2,6-dimethoxyphenoxy)-1-hydroxypropyl]-2-methoxyphenol	1.3785e+07	1.29846e+07	1.22514e+07	1.00524e+07	1.10403e+07	1.1419e+07
	4.44_380.09324	380.093	C19 H16 N4 O3 S	4-{[(3s)-3-(5-phenyl-1,3,4-oxadiazol-2-yl)-1-pyrrolidinyl]sulfonyl}benzonitrile	2.32586e+06	2.13227e+06	2.26062e+06	2.9123e+06	2.104e+06	1.91957e+06
	6.668_332.05315	332.053	C15 H13 Cl N4 O S	4-{2-[(2-chlorophenoxy)methyl]-4-methyl-1,3-thiazol-5-yl}pyrimidin-2-amine	3.52609e+06	3.59059e+06	2.73128e+06	973585	2.79232e+06	3.42625e+06
	12.327_392.18114	392.181	C22 H24 N4 O3	4-{5-[(3s)-1-(1,3-benzodioxol-5-ylmethyl)-3-pyrrolidinyl]-1,3,4-oxadiazol-2-yl}-n,n-dimethylaniline	3.35936e+06	3.17555e+06	4.06948e+06	1.38422e+06	4.01821e+06	3.64158e+06
	6.818_384.17612	384.176	C21 H22 F2 N4 O	4-{5-[(3s)-1-(3,4-difluorobenzyl)-3-pyrrolidinyl]-1,3,4-oxadiazol-2-yl}-n,n-dimethylaniline	1.43918e+07	1.26259e+07	1.50148e+07	1.01082e+07	1.44694e+07	1.37916e+07
	5.443_308.13722	308.137	C15 H20 N2 O5	4-acetamido-5-[2-(4-hydroxyphenyl)ethylamino]-5-oxopentanoic acid	863374	761759	977862	244957	4.63729e+06	2.61668e+06
	0.806_151.06347	151.063	C8 H9 N O2	4-Acetamidophenol	9.66854e+06	9.42178e+06	8.10462e+06	3.84189e+06	6.89735e+06	3.16831e+06
	6.151_164.04752	164.048	C9 H8 O3	4-coumaric acid	1.7032e+07	1.65041e+07	1.82988e+07	7.73862e+06	1.43586e+07	1.62832e+07
	5.483_470.17699	470.177	C30 H24 N4 O3	4-cyano-n-[(1r,9s)-11-(2-naphthoyl)-6-oxo-7,11-diazatricyclo[7.3.1.02,7]trideca-2,4-dien-5-yl]benzamide	5.03681e+06	4.59434e+06	4.45236e+06	8.95393e+06	3.99524e+06	4.33152e+06
	13.788_194.09462	194.095	C11 H14 O3	4-ethoxy ethylbenzoate	4.46465e+07	2.94695e+07	3.34094e+07	2.45387e+07	4.05318e+07	3.66397e+07
	5.686_134.07314	134.073	C9 H10 O	4-ethylbenzaldehyde	558892	272659	181318	1.1426e+06	969609	1.04485e+06
	1.175_390.17519	390.175	C20 H22 O6	4-hydroxy-5,8-dimethyl-3-methylene-2,7-dioxo-2,3,3a,4,4a,7,9,9a-octahydroazuleno[6,5-b]furan-9-yl 3-methyl-2-butenoate	1.07331e+06	1.17786e+06	1.23572e+06	310489	4.21245e+06	2.36092e+06
	4.647_162.03191	162.032	C9 H6 O3	4-Hydroxycoumarin	648329	6.06793e+06	831813	397394	534337	650891
	0.808_147.08951	147.09	C6 H13 N O3	4-Hydroxyisoleucine	1.54856e+09	1.43637e+09	2.1109e+09	1.16947e+08	1.30252e+09	1.47663e+09
	3.634_275.14813	275.148	C16 H21 N O3	4-hydroxypropranolol	3.83428e+06	3.39401e+06	4.85399e+06	286901	7.64834e+06	6.20259e+06
	3.827_145.05300	145.053	C9 H7 N O	4-indolecarbaldehyde	1.40922e+08	1.16098e+08	1.4236e+08	8.49479e+07	9.26176e+07	1.1269e+08
	8.212_150.06819	150.068	C9 H10 O2	4'-methoxyacetophenone	1.40614e+07	1.29841e+07	1.24099e+07	1.40746e+07	1.25458e+07	1.25365e+07
	7.558_136.05249	136.052	C8 H8 O2	4-methoxybenzaldehyde	4.29181e+06	3.83502e+06	2.7914e+06	4.44903e+06	3.22206e+06	3.5105e+06
	6.872_168.04248	168.042	C8 H8 O4	4-methoxysalicylic acid	1.68035e+07	1.83045e+07	1.92069e+07	6.83997e+06	2.61504e+07	2.1619e+07
	1.693_143.04073	143.041	C6 H9 N O S	4-methyl-5-thiazoleethanol	1.83961e+06	1.62261e+06	1.47647e+06	3.60822e+06	1.63046e+06	1.79487e+06
	9.138_176.04759	176.048	C10 H8 O3	4-methylumbelliferone	179374	184643	103855	4.97864e+06	184999	169473
	9.253_338.10027	338.1	C16 H18 O8	4-methylumbelliferyl-α-d-glucopyranoside	4.78403e+06	4.54602e+06	4.56677e+06	1.63598e+06	5.11894e+06	5.00627e+06
	1.486_259.18959	259.19	C17 H25 N O	4'-methyl-α-pyrrolidinohexanophenone	6.15789e+06	5.60836e+06	6.73496e+06	2.14315e+06	2.20584e+07	1.56693e+07
	6.952_146.07336	146.073	C10 H10 O	4-phenyl-3-buten-2-one	1.44875e+06	1.27949e+06	1.28339e+06	72126.6	1.42938e+06	1.39117e+06
	5.021_164.08394	164.084	C10 H12 O2	4-phenylbutyric acid	3.41268e+06	3.21988e+06	3.08045e+06	2.82392e+06	2.79073e+06	2.91269e+06
	5.476_449.13012	449.13	C23 H22 F3 N O3 S	5-(1,3-benzodioxol-5-yl)-3-[(2-{[3-(trifluoromethyl)benzyl]thio}ethyl)amino]cyclohex-2-en-1-one	3.56515e+06	4.14954e+06	6.11285e+06	1.26082e+06	1.90671e+06	2.63471e+06
	11.92_353.25658	353.257	C20 H32 O4	5-(4-carboxy-3-methylbutyl)-1,4a-dimethyl-6-methylenedecahydro-1-naphthalenecarboxylic acid	381709	584072	153845	864883	202306	535740
	5.649_364.14568	364.146	C18 H24 N2 O4 S	5-(ethylsulfonyl)-2-[(3s)-1-(tetrahydro-2h-pyran-4-yl)-3-pyrrolidinyl]-1,3-benzoxazole	3.5622e+06	2.88862e+06	4.54113e+06	6.21206e+06	4.0778e+06	2.90145e+06
	19.725_320.27144	320.271	C21 H36 O2	5(z),8(z),11(z)-eicosatrienoic acid methyl ester	665260	679042	514636	2.44237e+06	975717	775550
	5.412_468.16124	468.161	C29 H24 O6	5,5-methylenebis-2-hydroxy-4-methoxybenzophenone	2.57931e+06	2.72631e+06	3.27507e+06	1.61998e+06	2.21574e+06	2.52342e+06
	8.269_426.12929	426.129	C23 H22 O8	5,6a-dihydroxy-2-isopropenyl-8,9-dimethoxy-1,2,12,12a-tetrahydrochromeno[3,4-b]furo[2,3-h]chromen-6(6ah)-one	1.23868e+06	1.24288e+06	960922	3.35908e+06	868807	1.22383e+06
	6.085_370.13938	370.139	C21 H22 O6	5,7-dihydroxy-2-(4-hydroxy-3-methoxyphenyl)-6-(3-methyl-2-buten-1-yl)-2,3-dihydro-4h-chromen-4-one	5.30375e+06	4.66449e+06	4.93114e+06	1.7788e+06	2.68535e+06	3.03732e+06
	7.419_418.09023	418.09	C20 H18 O10	5,7-dihydroxy-2-(4-hydroxyphenyl)-4-oxo-4h-chromen-3-yl β-l-xylofuranoside	3.20099e+07	3.05512e+07	3.01234e+07	1.27647e+07	3.10726e+07	2.97776e+07
	7.096_192.04257	192.043	C10 H8 O4	5,7-Dihydroxy-4-methylcoumarin	965901	823892	879509	6.72184e+06	898990	752698
	4.38_454.14549	454.145	C28 H22 O6	5-{(2r,3s)-6-hydroxy-2-(4-hydroxyphenyl)-4-[(e)-2-(4-hydroxyphenyl)vinyl]-2,3-dihydro-1-benzofuran-3-yl}-1,3-benzenediol	1.20454e+07	1.48139e+07	1.73262e+07	1.01404e+07	1.32952e+07	5.61393e+06
	5.126_401.18752	401.188	C21 H25 N5 O2	5-{5-[(2s)-1-benzyl-2-pyrrolidinyl]-1,2,4-oxadiazol-3-yl}-n-(2-methoxyethyl)-2-pyridinamine	5.2855e+06	6.05453e+06	5.62728e+06	8.14683e+06	5.62607e+06	4.90825e+06
	5.42_376.13832	376.138	C23 H21 Cl N2 O	5-chloro thj 018	1.34682e+07	1.18354e+07	1.27215e+07	6.96076e+06	1.52345e+07	1.41454e+07
	5.574_386.15536	386.155	C19 H27 Cl O6	5-chloro-3-[(1e)-3,4-dihydroxy-3,5-dimethyl-1-hepten-1-yl]-7,8-dihydroxy-7-methyl-1,7,8,8a-tetrahydro-6h-isochromen-6-one	8.45049e+06	8.49446e+06	7.35979e+06	6.00443e+06	7.5592e+06	6.65764e+06
	5.094_384.13973	384.14	C19 H25 Cl O6	5-chloro-3-[(1e)-3,4-dihydroxy-3,5-dimethyl-1-hepten-1-yl]-7,8-dihydroxy-7-methyl-7,8-dihydro-6h-isochromen-6-one	3.73543e+06	3.68145e+06	3.67328e+06	3.49828e+06	3.39743e+06	3.18369e+06
	4.494_386.17671	386.177	C18 H25 F N4 O3	5-fluoro ab-pinaca n-(4-hydroxypentyl) metabolite	1.7292e+06	1.42762e+06	1.74754e+06	7.27598e+06	1.45615e+06	1.4407e+06
	14.768_316.20154	316.202	C21 H23 F N2 O	5-fluoro sdb-006	4.69739e+06	4.62024e+06	2.48756e+06	3.6544e+06	2.92098e+06	4.30985e+06
	4.431_426.18920	426.189	C21 H30 O9	5-formyl-4,8-dihydroxy-3-(3-methoxy-3-oxo-1-propen-2-yl)-8a-methyldecahydro-2-naphthalenyl 3,4-dihydroxy-2-methylenebutanoate	4.29544e+06	3.96651e+06	3.65688e+06	5.81921e+06	3.01453e+06	3.99169e+06
	10.342_298.08445	298.084	C17 H14 O5	5-Hydroxy-6,7-dimethoxylflavone	7.78704e+06	6.9312e+06	6.85802e+06	3.79506e+06	6.359e+06	6.82403e+06
	0.776_126.03152	126.032	C6 H6 O3	5-hydroxymethyl-2-furaldehyde	4.13564e+08	4.18587e+08	4.85407e+08	1.08918e+08	3.25486e+08	3.91068e+08
	1.197_220.08893	220.089	C11 H12 N2 O3	5-hydroxytryptophan	617356	1.07716e+06	1.22544e+06	69274.5	5.85389e+06	3.78014e+06
	0.751_350.06059	350.061	C13 H11 F3 N4 O3	5-methyl-n'-({[3-(trifluoromethyl)anilino]carbonyl}oxy)isoxazole-3-carboximidamide	5.19186e+08	6.50891e+08	6.70316e+08	1.0879e+08	7.23865e+08	6.12387e+08
	5.196_350.09785	350.098	C16 H13 F3 N4 O2	5-methyl-n-[1-methyl-4-phenyl-3-(trifluoromethyl)-1h-pyrazol-5-yl]-3-isoxazolecarboxamide	2.15655e+06	1.71794e+06	1.92189e+06	5.18113e+06	1.72866e+06	1.9425e+06
	6.284_452.16609	452.166	C22 H28 O10	5-O-Methylvisammioside	3.7778e+06	3.33e+06	4.99478e+06	1.22319e+06	3.84689e+06	3.74102e+06
	8.213_188.08399	188.084	C12 H12 O2	5-phenylcyclohexane-1,3-dione	4.8814e+06	4.39083e+06	4.08053e+06	4.82595e+06	3.97808e+06	4.07523e+06
	3.831_297.08954	297.09	C11 H15 N5 O3 S	5'-s-methyl-5'-thioadenosine	8.13706e+07	9.77386e+07	8.68115e+07	2.54696e+07	5.26245e+07	5.76296e+07
	17.323_290.22459	290.225	C19 H30 O2	5α-dihydrotestosterone	3.19597e+07	4.4521e+07	3.42293e+07	7.12094e+07	5.54593e+07	4.0552e+07
	10.365_378.20424	378.204	C21 H30 O6	6 β-hydroxycortisol	2.19719e+06	2.2089e+06	1.88084e+06	1.08328e+06	2.0418e+06	2.11863e+06
	1.879_437.13580	437.136	C23 H23 N3 O4 S	6-(3,4-dimethoxyphenyl)-2-(3,5-dimethoxyphenyl)-5-methylthieno[2,3-d]pyrimidin-4-amine	3.89717e+07	3.55935e+07	3.7402e+07	6.17301e+07	3.45576e+07	3.37191e+07
	4.393_316.16333	316.163	C19 H24 O4	6-[(3e,5e,7s)-5,7-dimethyl-2-oxo-3,5-nonadien-1-yl]-2,4-dihydroxy-3-methylbenzaldehyde	1.96833e+06	2.26424e+06	1.55857e+06	1.49864e+06	1.43966e+06	1.84325e+06
	6.699_342.11046	342.11	C19 H18 O6	6-Demethoxytangeretin	362828	313773	321142	1.01744e+06	322057	345632
	5.129_528.25816	528.258	C27 H42 N2 O6	6-hydroxy-1-(hydroxymethyl)-5-{2-[(4-methoxybenzyl)amino]-2-oxoethyl}-1,4a-dimethyldecahydro-2-naphthalenyl propylcarbamate	7.36856e+06	7.39024e+06	7.12566e+06	5.81448e+06	6.76436e+06	6.96795e+06
	7.467_208.07381	208.074	C11 H12 O4	6-hydroxy-8-methoxy-3-methyl-3,4-dihydro-1h-isochromen-1-one	2.01985e+07	1.8355e+07	1.93848e+07	2.61289e+07	1.8157e+07	1.80675e+07
	2.463_248.11961	248.12	C13 H16 N2 O3	6-hydroxymelatonin	4.11043e+06	7.0195e+06	5.80866e+06	1.27029e+06	1.72922e+07	1.14678e+07
	10.505_352.22258	352.223	C20 H34 O6	6-ketoprostaglandin f1α	2.66542e+08	2.07291e+08	1.17395e+08	2.59242e+08	1.88188e+08	2.39524e+08
	3.833_143.07381	143.074	C10 H9 N	6-methylquinoline	5.38069e+07	5.1776e+07	6.77052e+07	3.76432e+07	4.16307e+07	4.2024e+07
	11.702_446.23079	446.231	C25 H34 O7	6β-hydroxy budesonide	5.09186e+06	3.40948e+06	1.91813e+06	5.76588e+06	2.09388e+06	4.31909e+06
	7.1_1064.30236	1064.3	C48 H56 O27	7-({3-o-(β-d-glucopyranosyl)-2-o-[(2e)-3-(4-hydroxyphenyl)-2-propenoyl]-β-d-glucopyranosyl}oxy)-5-hydroxy-2-(4-hydroxyphenyl)-4-oxo-4h-chromen-3-yl 2-o-(6-deoxy-α-l-mannopyranosyl)-β-d-glucopyranoside	1.78208e+06	2.38008e+06	2.02765e+06	259143	1.91903e+06	1.74447e+06
	4.903_178.02685	178.027	C9 H6 O4	7,8-Dihydroxycoumarin	2.80384e+06	2.95094e+06	3.0796e+06	1.75599e+06	2.94812e+06	2.95613e+06
	16.516_364.20161	364.202	C24 H30 O4	7-{[(1s,4as,6r,8ar)-6-hydroxy-5,5,8a-trimethyl-2-methylenedecahydro-1-naphthalenyl]methoxy}-2h-chromen-2-one	3.39294e+06	2.89161e+06	2.19773e+06	5.93892e+06	2.60891e+06	3.0887e+06
	6.207_434.12158	434.122	C21 H22 O10	7-hydroxy-2-(4-hydroxyphenyl)-4-oxo-3,4-dihydro-2h-chromen-5-yl β-d-glucopyranoside	7.35045e+06	7.19939e+06	7.56075e+06	1.67571e+07	7.49388e+06	7.83843e+06
	6.294_162.03191	162.032	C9 H6 O3	7-hydroxycoumarine	65059.9	2.42126e+07	385159	132302	255272	231277
	15.203_454.26769	454.268	C29 H36 O4	7-hydroxycoumarinyl arachidonate	2.06001e+07	2.36627e+07	3.30997e+07	1.74775e+07	4.17263e+07	3.59744e+07
	18.82_176.04742	176.047	C10 H8 O3	7-Methoxycoumarin	2.37161e+06	2.25268e+06	2.69814e+06	1.79277e+06	2.09435e+06	1.76489e+06
	14.139_304.20381	304.204	C19 H28 O3	7α-hydroxytestosterone	249122	312044	127526	4.29351e+06	145003	202936
	1.878_145.05300	145.053	C9 H7 N O	8-hydroxyquinoline	8.39325e+07	7.62768e+07	8.63926e+07	3.44119e+07	7.80317e+07	7.79485e+07
	10.505_373.28289	373.283	C20 H36 O5	8-isoprostaglandin f1β	4.53271e+06	3.1841e+06	2.01825e+06	3.8404e+06	3.25628e+06	4.4135e+06
	4.217_423.17433	423.174	C17 H26 O11	8-O-Acetylharpagide	1.82633e+06	1.71641e+06	1.77717e+06	2.61229e+06	1.99754e+06	2.08782e+06
	8.662_340.13078	340.131	C20 H20 O5	8-Prenylnaringenin	873314	1.0559e+06	981004	1.4689e+06	954110	988519
	18.948_316.19874	316.199	C18 H30 O3	9(s)-hotre	3.96518e+06	4.73304e+06	4.51471e+06	2.65246e+06	4.1438e+06	4.13288e+06
	18.149_292.24021	292.24	C19 H32 O2	9(z),11(e),13(e)-octadecatrienoic acid methyl ester	1.63019e+08	1.27773e+08	9.61859e+07	4.76857e+08	1.23375e+08	1.57736e+08
	8.023_405.21865	405.219	C22 H28 O6	9b-hydroxy-6-(hydroxymethyl)-6,9a-dimethyl-3-oxododecahydronaphtho[1,2-c]furan-5-yl benzoate	2.65e+06	5.50737e+06	4.10068e+06	2.50109e+06	1.19505e+06	976005
	12.307_327.24098	327.241	C18 H33 N O4	9-nitrooleate	1.25117e+07	1.3189e+07	8.98436e+06	8.74509e+06	8.85812e+06	1.12089e+07
	16.356_294.21956	294.22	C18 H30 O3	9-oxo-10(e),12(e)-octadecadienoic acid	5.14437e+08	4.43602e+08	2.26452e+08	7.0029e+08	2.85778e+08	4.49425e+08
	16.157_294.21955	294.22	C18 H30 O3	9-oxo-ode	1.38448e+08	1.51114e+08	8.57416e+07	1.31434e+08	1.07929e+08	1.12555e+08
	12.718_292.20389	292.204	C18 H28 O3	9s,13r-12-oxophytodienoic acid	2.24191e+07	2.4265e+07	1.79821e+07	1.98009e+07	2.22152e+07	2.02382e+07
	5.133_395.17923	395.179	C20 H27 N3 O4	Ab-chminaca metabolite m3a	2.29901e+07	2.60063e+07	2.32054e+07	5.26044e+07	1.95337e+07	1.42074e+07
	3.511_409.15866	409.159	C20 H25 N3 O5	Ab-chminaca metabolite m7	7.80143e+06	7.83884e+06	9.89157e+06	1.40732e+07	1.03437e+07	7.72004e+06
	10.939_302.22453	302.225	C20 H30 O2	Abietic acid	1.45819e+06	1.30887e+06	1.28434e+06	523838	1.08141e+06	1.12131e+06
	7.041_264.13622	264.136	C15 H20 O4	Abscisic acid	7.06243e+06	5.70846e+06	6.73688e+06	6.79362e+06	8.46132e+06	7.83809e+06
	4.009_145.11048	145.11	C7 H15 N O2	Acetylcholine	1.90061e+06	2.04078e+06	2.03785e+06	1.09743e+06	8.04924e+06	5.81092e+06
	1.616_203.11590	203.116	C9 H17 N O4	Acetyl-l-carnitine	3.5139e+06	3.43292e+06	3.28707e+06	1.36128e+06	3.66504e+06	3.11875e+06
	4.913_194.05821	194.058	C10 H10 O4	Acetylvanillin	7.87422e+06	7.9054e+06	7.95151e+06	5.70664e+06	7.77274e+06	7.48462e+06
	6.48_366.20416	366.204	C19 H28 N4 O2	Adb-pinaca	1.73312e+06	1.68664e+06	1.86096e+06	1.28569e+06	1.86255e+06	1.90554e+06
	1.103_135.05458	135.055	C5 H5 N5	Adenine	1.42879e+08	1.04507e+08	1.4416e+08	6.99923e+07	1.21519e+08	1.29645e+08
	1.104_267.09664	267.097	C10 H13 N5 O4	Adenosine	2.16904e+09	1.95459e+09	2.52401e+09	1.2216e+09	2.24203e+09	2.11592e+09
	0.778_347.06209	347.062	C10 H14 N5 O7 P	Adenosine 5′-monophosphate	4.40031e+07	5.94134e+07	1.06485e+08	3.08162e+06	3.41291e+07	4.12189e+07
	1.41_267.09673	267.097	C10 H13 N5 O4	Adenosine	2.30319e+07	2.40289e+07	3.01952e+07	1.64311e+07	2.25291e+07	1.82034e+07
	6.565_314.07894	314.079	C17 H14 O6	Aflatoxin b2	2.43317e+06	2.27057e+06	2.1425e+06	885116	1.94073e+06	2.30481e+06
	6.747_318.11027	318.11	C17 H18 O6	Agarotetrol	3.40753e+06	3.04002e+06	2.95249e+06	4.00159e+06	2.98794e+06	2.82609e+06
	9.924_234.16216	234.162	C15 H24 O3	Ageratriol	3.78377e+06	3.19806e+06	2.52222e+06	3.03188e+06	3.35747e+06	2.97735e+06
	6.788_376.15227	376.152	C20 H24 O7	Ailanthone	2.02729e+07	2.04057e+07	2.31475e+07	1.88803e+07	2.06271e+07	1.91239e+07
	8.338_438.22330	438.223	C25 H33 F O4	Al 8810 methyl ester	1.53828e+06	5.00614e+06	2.1721e+06	4.24348e+06	1.65156e+06	1.62743e+06
	1.744_252.11109	252.111	C12 H16 N2 O4	Alanyltyrosine	2.41901e+06	2.70538e+06	2.55982e+06	994087	1.46803e+07	1.14776e+07
	7.722_272.10492	272.105	C16 H18 O5	Albiflorin-3	2.12507e+07	1.84966e+07	1.76297e+07	1.20561e+07	1.78054e+07	1.78136e+07
	7.65_304.22495	304.225	C16 H32 O5	Aleuritic acid	1.38763e+06	1.2602e+06	1.17473e+06	2.37218e+06	1.10484e+06	1.25188e+06
	1.111_136.03861	136.039	C5 H4 N4 O	Allopurinol	2.166e+07	1.87762e+07	1.16071e+07	1.81819e+07	1.00754e+07	1.87422e+07
	1.209_332.10827	332.108	C19 H16 N4 S	Allyl 2-(1h-benzimidazol-2-yl)-2-cyano-n-phenylethanimidothioate	3.3349e+06	2.34613e+06	3.61036e+06	1.62084e+06	2.92872e+06	2.78018e+06
	4.642_162.06827	162.068	C10 H10 O2	alpha-Methylcinnamic acid	876612	904763	1.39658e+06	1.08373e+06	1.02332e+06	2.33116e+06
	8.212_286.12042	286.12	C15 H20 O4	Ambrosic acid	5.61078e+07	5.27754e+07	4.9655e+07	5.60774e+07	4.77856e+07	5.01154e+07
	0.801_349.11177	349.112	C16 H19 N3 O4 S	Ampicillin	2.51392e+06	3.17483e+06	5.78762e+06	3.33283e+07	8.17929e+06	6.33656e+06
	18.509_360.28520	360.285	C22 H36 O3	Anacardic acid	6.08028e+06	5.94593e+06	6.52214e+06	7.09646e+06	9.748e+06	7.05282e+06
	17.323_353.29296	353.293	C22 H37 N O2	Anandamide (aea)	913689	1.42367e+06	1.26232e+06	1.99653e+06	3.02187e+06	1.78817e+06
	9.923_350.20692	350.207	C20 H30 O5	Andrographolide	1.00601e+08	7.69324e+07	5.72114e+07	8.12361e+07	8.15058e+07	8.6212e+07
	5.341_328.11565	328.116	C15 H20 O8	Androsin	365700	387570	342785	4.50557e+06	278851	287913
	7.517_446.08534	446.085	C21 H18 O11	Apigenin 7-O-glucuronide	1.68366e+06	5.26617e+06	2.24307e+06	276254	960767	1.23403e+06
	7.518_166.06323	166.063	C9 H10 O3	Apocynin	4.92239e+06	4.3106e+06	4.35501e+06	3.05337e+06	4.15543e+06	4.38391e+06
	6.044_438.15029	438.15	C24 H21 F N4 O2	App-fubinaca	9.48284e+07	9.63511e+07	1.31197e+08	3.52087e+07	1.00007e+08	1.05002e+08
	16.348_338.28211	338.282	C22 H36 O2	Arachidonic acid ethyl ester	2.14643e+07	2.17458e+07	3.04534e+07	4.10366e+06	5.68275e+07	4.26919e+07
	12.695_303.25617	303.256	C20 H33 N O	Arachidonoyl amide	3.37237e+06	3.90738e+06	3.33876e+06	4.57816e+06	3.07765e+06	3.2012e+06
	12.502_361.28289	361.283	C23 H38 F N O2	Arn1203	3.36147e+06	9.04177e+06	2.48671e+06	8.46994e+06	3.10298e+06	3.48345e+06
	11.373_234.16215	234.162	C15 H22 O2	Artemisinic acid	2.82002e+06	2.08442e+06	898113	2.3947e+07	1.09589e+06	1.92056e+06
	13.412_488.35095	488.351	C30 H48 O5	Asiatic acid	4.32989e+07	8.04983e+07	4.33916e+07	8.02822e+07	6.07787e+07	5.48778e+07
	0.754_132.05331	132.053	C4 H8 N2 O3	Asparagine	5.64523e+07	6.53242e+07	1.07179e+08	8.55636e+06	4.14828e+07	3.84019e+07
	4.61_294.12156	294.122	C14 H18 N2 O5	Aspartame	1.02701e+07	9.81977e+06	8.89981e+06	4.38572e+06	5.56482e+06	7.67063e+06
	6.987_454.10907	454.109	C18 H24 O12	Asperulosidic acid	9.34604e+06	8.81238e+06	1.0536e+07	2.77122e+06	9.90882e+06	8.68499e+06
	7.155_448.10098	448.101	C21 H20 O11	Astragalin	1.66059e+08	1.70174e+08	1.89185e+08	5.14348e+07	1.55261e+08	1.60312e+08
	7.526_492.12783	492.128	C23 H24 O12	Aurantio-obtusin β-D-glucoside	3.19519e+06	3.1276e+06	3.47043e+06	2.3011e+06	2.97617e+06	3.22815e+06
	9.956_330.07397	330.074	C17 H14 O7	Aurantio-obtusin	1.43798e+07	1.32605e+07	1.50519e+07	3.49057e+06	1.47899e+07	1.23671e+07
	4.567_468.08856	468.089	C21 H26 Br F N2 O2 S	Ave8923	6.23057e+06	5.11911e+06	7.6232e+06	4.36995e+06	7.69697e+06	6.32345e+06
	6.999_434.08527	434.085	C20 H18 O11	Avicularin	6.62359e+06	5.86376e+06	6.05161e+06	1.82873e+06	6.26561e+06	5.83936e+06
	16.516_348.22766	348.228	C19 H34 O4	Avocadyne 1-acetate	2.36288e+07	2.3295e+07	1.5422e+07	4.53824e+07	1.82873e+07	2.2748e+07
	18.199_770.49553	770.496	C38 H72 N2 O12	Azithromycin	2.1123e+06	1.94291e+06	1.94121e+06	3.97539e+06	2.27693e+06	1.91102e+06
	17.4_734.49068	734.491	C37 H70 N2 O12	Azithromycin impurity a	4.71765e+06	4.15892e+06	4.14885e+06	7.31998e+06	7.59196e+06	6.32638e+06
	1.614_163.08604	163.086	C6 H13 N O4	Bicine	2.91355e+06	2.95348e+06	2.82279e+06	3.42942e+06	2.35498e+06	2.58396e+06
	6.807_372.17600	372.176	C16 H28 N4 O4 S	Biocytin	2.91987e+06	2.72689e+06	3.39255e+06	2.31201e+06	3.24699e+06	3.23965e+06
	6.085_338.19164	338.192	C22 H26 O3	Bioresmethrin	1.12631e+07	1.17282e+07	1.52331e+07	3.37467e+06	7.77767e+06	9.48249e+06
	5.406_244.08820	244.088	C10 H16 N2 O3 S	Biotin	2.49231e+06	2.43832e+06	2.33024e+06	1.26514e+06	2.71327e+06	2.68669e+06
	13.574_414.20451	414.205	C24 H30 O6	Bis(4-ethylbenzylidene)sorbitol	1.85621e+09	1.78925e+09	1.65873e+09	7.17743e+08	1.69825e+09	1.69418e+09
	12.326_386.17310	386.173	C22 H26 O6	Bis(methylbenzylidene)sorbitol	1.3432e+09	1.18731e+09	1.52992e+09	5.55865e+08	1.50014e+09	1.35873e+09
	10.991_325.22530	325.225	C18 H31 N O4	Bisoprolol	334990	270024	233877	972154	148487	228047
	6.957_312.13610	312.136	C19 H20 O4	Bisphenol a diacetate	1.34038e+07	1.18459e+07	1.27583e+07	4.96796e+06	1.23608e+07	1.24194e+07
	8.224_192.07887	192.079	C11 H12 O3	Bmk methyl glycidate	5.10322e+06	4.92513e+06	4.49165e+06	4.91115e+06	5.44214e+06	5.14751e+06
	9.711_410.28581	410.286	C27 H38 O3	Boldenone cypionate	1.41586e+06	1.97965e+06	1.31952e+06	5.5472e+06	1.46534e+06	1.18238e+06
	14.12_452.32947	452.329	C30 H44 O3	Boldenone undecylenate	4.34717e+07	3.81109e+08	1.27654e+08	7.07118e+07	1.22385e+08	1.41177e+08
	7.365_386.24575	386.246	C24 H34 O4	Bufalin	2.54514e+06	3.57e+06	3.66313e+06	2.37191e+06	4.60218e+06	5.54923e+06
	16.567_343.24870	343.249	C22 H33 N O2	Bullatine A	7.17945e+06	9.4539e+06	7.07229e+06	4.898e+06	1.05204e+07	1.06868e+07
	5.682_327.21567	327.216	C21 H29 N O2	Butorphanol	325952	337580	261813	134902	1.87577e+06	1.70514e+06
	4.522_316.09468	316.095	C17 H16 O6	Byakangelicol	1.47562e+08	1.51535e+08	8.93589e+07	3.26499e+07	6.6256e+07	1.03949e+08
	2.449_180.04251	180.043	C9 H8 O4	Caffeic acid	2.7933e+07	3.17456e+07	2.50138e+07	7.8831e+06	3.53845e+07	2.80157e+07
	6.572_478.14821	478.148	C23 H26 O11	Calceolarioside B	814921	777307	1.02815e+06	1.70863e+06	990542	819309
	6.262_152.12029	152.12	C10 H16 O	Camphor	9.11922e+06	1.02065e+07	9.7638e+06	7.11866e+06	7.07467e+06	7.85059e+06
	4.354_201.13677	201.137	C10 H19 N O3	Capryloylglycine	2.22766e+06	1.96952e+06	2.26633e+06	161851	1.33309e+06	1.29508e+06
	2.121_226.09530	226.095	C10 H14 N2 O4	Carbidopa	9.20574e+06	1.36056e+07	1.46658e+07	8.48802e+06	1.32077e+07	1.37508e+07
	4.539_290.07909	290.079	C15 H14 O6	Catechin	9.16102e+08	8.12113e+08	1.52182e+09	3.47596e+08	9.08678e+08	9.22568e+08
	10.896_490.29377	490.294	C28 H42 O7	Caudatin	8.401e+06	1.26748e+07	1.18456e+07	1.17274e+07	1.0724e+07	7.99361e+06
	4.702_354.09505	354.095	C16 H18 O9	Chlorogenic acid	444406	2.03581e+07	735169	617649	521451	700581
	1.915_346.12393	346.124	C19 H23 Cl N2 S	Chlorproethazine	1.0151e+07	1.12953e+07	1.25396e+07	1.01078e+07	1.17634e+07	1.10694e+07
	6.989_148.05267	148.053	C9 H8 O2	Cinnamic acid	1.10653e+07	1.27633e+07	1.22787e+07	3.76956e+06	6.8848e+06	8.51578e+06
	0.752_131.05812	131.058	C5 H9 N O3	cis-4-Hydroxy-D-proline	5.10873e+07	6.88654e+07	1.11897e+08	1.40632e+07	6.96092e+07	6.75994e+07
	5.042_152.12030	152.12	C10 H16 O	Citral	2.45266e+06	2.37539e+06	2.35381e+06	2.28817e+06	1.21772e+06	1.97162e+06
	5.016_424.19238	424.192	C23 H30 O6	Citreoviridin	2.22712e+07	2.29182e+07	2.28154e+07	1.56193e+07	2.14197e+07	2.10447e+07
	14.241_250.19339	250.193	C16 H26 O2	Clareolide	2.08457e+06	1.44489e+06	397340	8.27126e+06	1.04763e+06	2.12031e+06
	15.065_337.25925	337.259	C21 H36 Cl N	Clofilium	1.8121e+07	1.7759e+07	1.78237e+07	7.10781e+06	9.5924e+06	1.22958e+07
	8.225_328.13108	328.131	C19 H20 O5	Columbianadin	2.13848e+07	2.08003e+07	2.18121e+07	2.08179e+07	2.09192e+07	1.99149e+07
	1.152_251.10193	251.102	C10 H13 N5 O3	Cordycepin	1.40855e+07	1.58494e+07	1.24895e+07	3.19511e+06	1.53978e+07	1.94971e+07
	16.278_472.35582	472.356	C30 H48 O4	Corosolic acid	5.71663e+08	6.38223e+08	7.04973e+08	3.56555e+08	7.10756e+08	6.14017e+08
	15.609_346.21182	346.212	C21 H30 O4	Corticosterone	4.86583e+06	8.38345e+06	3.67581e+06	1.16708e+07	7.268e+06	5.10006e+06
	3.757_320.10418	320.104	C20 H16 O4	Corylin	1.56883e+06	1.83644e+06	2.9338e+06	629305	5.12256e+06	3.56193e+06
	4.874_146.03696	146.037	C9 H6 O2	Coumarin	5.52024e+06	5.63323e+06	5.40328e+06	6.24892e+06	2.35812e+06	3.16338e+06
	3.988_146.03693	146.037	C9 H6 O2	Coumarin	5.67437e+06	5.25189e+06	5.4102e+06	299436	6.02532e+06	4.80041e+06
	5.302_292.10929	292.109	C19 H16 O3	Coumatetralyl	1.15902e+07	1.0865e+07	1.01746e+07	9.35665e+06	8.3292e+06	8.65666e+06
	13.089_520.30455	520.305	C29 H44 O8	Cyasterone	199619	189654	158407	4.09659e+06	235119	254751
	10.882_548.29729	548.297	C30 H44 O9	Cymarin	1.64007e+06	1.7839e+06	1.67985e+06	3.75163e+06	1.77212e+06	1.57345e+06
	0.755_146.06900	146.069	C5 H10 N2 O3	D-(-)-glutamine	2.25049e+08	3.23535e+08	4.28393e+08	5.59251e+08	3.08236e+08	2.64028e+08
	0.83_179.07955	179.08	C6 H13 N O5	D-(+)-Glucosamine	1.05853e+08	6.82831e+07	8.38761e+07	8.47691e+07	6.22349e+07	9.101e+07
	0.847_197.08976	197.09	C6 H12 O6	D-(+)-glucose	1.41148e+08	9.06421e+07	1.54272e+08	9.14269e+07	4.63345e+07	9.79861e+07
	0.781_364.09712	364.097	C12 H22 O11	D-(+)-maltose	2.16214e+07	2.13374e+07	1.12576e+07	7.55164e+06	1.72562e+07	2.25607e+07
	16.185_446.24126	446.241	C23 H34 N2 O4 S	Dauda	4.67553e+07	1.08958e+07	2.10375e+08	2.5172e+07	9.58436e+07	2.33335e+06
	1.646_373.10096	373.101	C21 H15 N3 O4	Deferasirox	1.31755e+08	1.3732e+08	1.42677e+08	1.17362e+08	1.44867e+08	1.38764e+08
	6.641_315.17291	315.173	C20 H28 O4	Dehydroandrographolide	2.45431e+06	3.82035e+06	1.82359e+06	83837.8	250031	1.26614e+06
	6.955_326.15179	326.152	C20 H22 O4	Dehydrodiisoeugenol	2.77679e+06	8.34027e+07	2.55002e+06	1.386e+06	8.04514e+07	8.26908e+07
	20.766_484.35311	484.353	C31 H48 O4	Dehydrotumulosic acid	1.47955e+06	1.53416e+06	1.3555e+06	2.93025e+06	1.15223e+06	1.32745e+06
	0.866_262.00905	262.009	C6 H15 O5 P S2	Demeton-s-methyl sulfone	5.06096e+07	6.00706e+07	4.4384e+07	1.49929e+06	6.23228e+07	5.957e+07
	5.48_454.20311	454.203	C26 H30 O7	Deoxylimonin	3.53823e+06	3.02208e+06	3.02526e+06	5.93339e+06	3.02405e+06	3.10771e+06
	17.321_330.21700	330.217	C21 H30 O3	Desoxycortone	1.23104e+07	1.68773e+07	1.49696e+07	2.21327e+07	2.09283e+07	1.66862e+07
	8.094_404.14735	404.147	C21 H24 O8	Desoxyrhaponticin	4.70896e+06	4.69694e+06	3.81486e+06	1.48485e+07	3.63215e+06	3.89018e+06
	6.212_214.13194	214.132	C10 H18 N2 O3	Desthiobiotin	6.86738e+06	6.48407e+06	6.16585e+06	2.68931e+06	5.83986e+06	5.72231e+06
	6.706_392.19478	392.195	C22 H29 F O5	Dexamethasone	9.04383e+06	8.37701e+06	7.69914e+06	2.66175e+07	8.07726e+06	8.61984e+06
	0.868_162.05255	162.053	C6 H13 N O5	D-glucosamine	1.07452e+08	7.09788e+07	1.31135e+08	9.00547e+07	4.9264e+07	7.7313e+07
	0.761_147.05298	147.053	C5 H9 N O4	D-Glutamic acid	1.1379e+08	1.11106e+08	1.5964e+08	1.44431e+08	1.15488e+08	1.34219e+08
	8.759_388.15232	388.152	C19 H26 O7	Diacetoxyscirpenol	1.08231e+07	1.06149e+07	1.03405e+07	7.48848e+06	1.02039e+07	9.47962e+06
	0.76_190.09512	190.095	C7 H14 N2 O4	Diaminopimelic acid	7.50827e+07	6.73721e+07	1.0851e+08	2.66023e+07	1.49778e+08	1.13081e+08
	4.53_260.12625	260.126	C13 H16 N4 O2	Diaveridine	1.86555e+06	1.88597e+06	2.3322e+06	616294	2.39625e+06	2.59965e+06
	12.709_424.22304	424.223	C28 H28 N2 O2	Difenoxin	439892	382455	276006	2.19055e+06	504126	415356
	7.778_374.13662	374.137	C20 H22 O7	Diffractic acid	3.54523e+07	3.6146e+07	3.51375e+07	4.23781e+07	3.17349e+07	3.38278e+07
	2.036_148.05257	148.053	C9 H8 O2	Dihydrocoumarin	1.08222e+09	6.91289e+08	9.22208e+08	3.92577e+08	1.05949e+09	9.55362e+08
	5.462_320.05323	320.053	C15 H12 O8	Dihydromyricetin	1.17693e+08	1.14246e+08	1.32498e+08	3.47079e+07	1.37171e+08	1.25965e+08
	1.575_278.09371	278.094	C18 H14 O3	Dihydrotanshinone I	3.39571e+06	3.01723e+06	3.19049e+06	638797	8.0419e+06	5.4922e+06
	7.97_414.16797	414.168	C22 H26 N2 O4 S	Diltiazem	1.25646e+07	1.29931e+07	1.21423e+07	1.26967e+07	1.20982e+07	1.16008e+07
	5.495_261.10018	261.1	C14 H12 O4	Dimethyl 2,6-naphthalenedicarboxylate	1.08029e+06	680715	745592	9.442e+06	1.27724e+06	874922
	17.444_504.30958	504.31	C24 H40 N8 O4	Dipyridamole	1.4485e+07	1.35158e+07	1.45793e+07	4.64886e+07	2.21173e+07	1.63823e+07
	0.716_174.11176	174.112	C6 H14 N4 O2	Dl-arginine	3.24321e+08	3.45768e+08	5.00814e+08	5.70897e+07	6.02276e+08	3.66787e+08
	1.241_143.09457	143.095	C7 H13 N O2	Dl-stachydrine	1.50496e+06	3.47462e+06	3.4581e+06	867104	3.78914e+06	3.48497e+06
	0.779_521.19525	521.195	C18 H32 O16	D-raffinose	9.09701e+06	8.81906e+06	1.73844e+07	2.10251e+07	7.10251e+06	1.14603e+07
	15.255_317.23464	317.235	C20 H31 N O2	Drofenine	1.41637e+08	1.48111e+08	1.41231e+08	6.33347e+07	1.85323e+08	1.53578e+08
	16.528_299.28242	299.282	C18 H37 N O2	D-sphingosine	9.6407e+06	1.04441e+07	8.89886e+06	2.02126e+07	9.79528e+06	1.02762e+07
	18.748_308.23509	308.235	C20 H30 O2	Eicosapentaenoic acid	1.28255e+08	1.31136e+08	8.56071e+07	4.58062e+08	1.08546e+08	1.41445e+08
	11.575_308.19637	308.196	C20 H24 O2	Eicosatetraynoic acid	952016	691970	313619	6.04528e+06	726342	832150
	6.104_434.12158	434.122	C21 H22 O10	Engeletin	7.26424e+06	6.7858e+06	7.14589e+06	1.79101e+07	7.36412e+06	7.24484e+06
	11.516_354.24059	354.241	C20 H34 O5	Ent-8-iso prostaglandin f2α	1.35295e+06	1.52012e+06	1.30244e+06	1.31306e+06	1.15695e+06	1.19075e+06
	4.122_306.07393	306.074	C15 H14 O7	Epigallocatechin	4.50013e+06	4.01025e+06	4.69731e+06	1.4585e+06	6.91248e+06	5.01646e+06
	5.715_458.08541	458.085	C22 H18 O11	Epigallocatechin gallate	6.88889e+06	6.60702e+06	7.77731e+06	1.52908e+06	7.18202e+06	6.93012e+06
	2.256_183.08985	183.09	C9 H13 N O3	Epinephrine	1.77734e+07	1.38926e+07	4.55662e+06	1.82673e+07	1.31359e+07	1.41966e+07
	10.743_424.15002	424.15	C23 H24 N2 O4 S	Eprosartan	1.86737e+06	1.7183e+06	1.3828e+06	1.75214e+06	1.17932e+06	1.6992e+06
	4.543_288.06353	288.064	C15 H12 O6	Eriodictyol	3.72799e+07	3.83348e+07	6.88898e+07	1.52556e+07	4.63192e+07	3.64919e+07
	3.513_414.11402	414.114	C18 H18 N6 O4 S	Ethyl 2-(methoxyimino)-2-(2-{[(5-methyl-2-phenyl-2h-1,2,3-triazol-4-yl)carbonyl]amino}-1,3-thiazol-4-yl)acetate	6.5867e+06	6.17659e+06	6.16719e+06	7.28249e+06	6.97328e+06	6.16671e+06
	2.062_283.10272	283.103	C14 H13 N5 O2	Ethyl 2-cyano-2-[2-(3-phenyl-1h-pyrazol-5-yl)hydrazono]acetate	9.22197e+06	7.88029e+06	1.78699e+07	1.49105e+06	2.64566e+06	1.88016e+06
	7.454_503.23747	503.237	C27 H35 N3 O5	Ethyl 3-({[(3r,4s)-3-ethyl-4-{2-[(4-methoxybenzyl)amino]-2-oxoethyl}-1-piperidinyl]carbonyl}amino)benzoate	4.47821e+07	4.39551e+07	4.97104e+07	9.38568e+06	4.65539e+07	4.21728e+07
	5.479_493.25337	493.253	C28 H37 N3 O6	Ethyl 3-({[(3r,4s)-4-{2-[(3,4-dimethoxybenzyl)amino]-2-oxoethyl}-3-ethyl-1-piperidinyl]carbonyl}amino)benzoate	798423	712465	676596	1.71998e+06	713066	745170
	5.247_264.14744	264.147	C14 H20 N2 O3	Ethyl 4-(2-methoxyphenyl)piperazine-1-carboxylate	2.34268e+06	3.55301e+06	2.03108e+06	1.16558e+06	2.20792e+07	1.8319e+07
	6.965_416.12399	416.124	C18 H20 N6 O4 S	Ethyl 4-[5-amino-4-(ethoxycarbonyl)-1h-pyrazol-1-yl]-5,8-dihydropyrido[4',3':4,5]thieno[2,3-d]pyrimidine-7(6h)-carboxylate	4.85324e+06	4.87661e+06	5.61839e+06	1.367e+06	6.21823e+06	5.7729e+06
	6.817_206.09455	206.095	C12 H14 O3	Ethyl 4-methoxycinnamate	3.07679e+07	2.94282e+07	2.78789e+07	2.08912e+07	2.92857e+07	2.9389e+07
	0.79_338.08476	338.085	C16 H13 Cl N4 O3 S	Ethyl 5-{2-[2-(4-chlorophenyl)-1-cyano-2-oxoethylidene]hydrazino}-3-methylisothiazole-4-carboxylate	7.64831e+06	7.58464e+06	1.11901e+07	1.07502e+07	1.13415e+07	8.4833e+06
	8.209_414.07675	414.077	C21 H16 N2 O6	Ethyl 7-[2-(3-cyanoanilino)-2-oxoethoxy]-4-oxo-4h-chromene-2-carboxylate	3.50649e+06	3.42011e+06	3.70028e+06	2.84578e+06	3.00916e+06	3.30424e+06
	6.55_234.05294	234.053	C8 H14 N2 O2 S2	Ethyl n-(1,4-thiazinan-4-ylcarbothioyl)carbamate	5.68907e+06	4.13473e+06	4.37076e+06	2.95505e+06	3.90882e+06	4.02038e+06
	7.779_380.14478	380.145	C14 H24 N2 O10	Ethylene glycol tetraacetic acid (egta)	1.31398e+06	1.4492e+06	1.24871e+06	1.57778e+06	1.22504e+06	1.28896e+06
	13.789_166.06326	166.063	C9 H10 O3	Ethylparaben	3.65877e+07	2.27731e+07	2.31222e+07	1.91342e+07	3.00403e+07	2.99236e+07
	0.83_332.08952	332.09	C17 H16 O7	Evernic acid	4.77664e+07	5.22254e+07	4.42831e+07	1.40453e+07	3.10065e+07	4.07355e+07
	17_264.20897	264.209	C17 H28 O2	Farnesyl Acetate	563510	504068	374400	6.63062e+06	833543	592723
	7.433_178.06323	178.063	C10 H10 O3	Ferulaldehyde	2.71791e+07	2.77403e+07	2.533e+07	2.32774e+07	3.36057e+07	2.87809e+07
	6.631_194.05817	194.058	C10 H10 O4	Ferulic acid	4.51723e+07	4.65076e+07	4.83099e+07	2.0927e+07	4.24476e+07	4.24486e+07
	5.524_194.05818	194.058	C10 H10 O4	Ferulic acid	1.08942e+06	1.05472e+06	939428	3.50355e+06	928786	969355
	5.277_501.28064	501.281	C32 H39 N O4	Fexofenadine	1.03457e+06	745556	882674	114440	1.03721e+07	7.80839e+06
	4.724_456.10507	456.105	C17 H21 N4 O9 P	Flavin mononucleotide	6.49855e+06	6.39252e+06	7.5052e+06	901387	8.00127e+06	6.04037e+06
	8.211_284.10476	284.105	C17 H16 O4	Flavokawain B	1.27964e+07	1.21977e+07	1.15079e+07	1.27064e+07	1.07834e+07	1.15763e+07
	7.874_408.05170	408.052	C16 H13 Cl F4 N2 O4	Flufenpyr-ethyl	6.77994e+06	6.32892e+06	6.44966e+06	1.74723e+06	6.49532e+06	5.9187e+06
	4.84_309.13984	309.14	C17 H18 F3 N O	Fluoxetine	1.33191e+07	1.22719e+07	1.16134e+07	1.94833e+07	1.16141e+07	1.2485e+07
	5.851_434.15794	434.158	C23 H25 F3 N2 O S	Flupentixol	2.47233e+06	2.32856e+06	2.54007e+06	1.16279e+06	2.39722e+06	2.51929e+06
	5.579_304.12866	304.129	C15 H17 F N4 O2	Flupirtine	3.38779e+06	3.19364e+06	3.60275e+06	5.5606e+06	2.77681e+06	3.05591e+06
	3.601_473.16646	473.166	C20 H23 N7 O7	Folinic acid	6.05773e+07	6.00701e+07	6.78704e+07	3.88363e+07	6.65046e+07	6.02352e+07
	1.554_208.03738	208.037	C10 H8 O5	Fraxetin	1.64996e+07	1.66563e+07	1.71646e+07	9.3725e+06	1.57571e+07	1.5286e+07
	3.336_212.06868	212.069	C10 H12 O5	Gallic acid trimethyl ether	2.36402e+06	3.08187e+06	3.23705e+06	2.62905e+06	1.98769e+06	1.94561e+06
	8.803_136.12540	136.125	C10 H16	gamma-Terpinene	2.20044e+06	1.79889e+06	1.57019e+06	1.61469e+06	1.44138e+06	1.66108e+06
	6.085_354.16546	354.165	C19 H22 N4 O3	Gendenafil	7.03512e+07	7.08487e+07	8.67801e+07	2.23798e+07	4.73489e+07	5.226e+07
	5.084_410.11907	410.119	C17 H24 O10	Geniposide	4.61296e+06	4.20357e+06	4.2511e+06	2.76871e+06	3.76871e+06	3.88992e+06
	5.804_288.06347	288.063	C15 H10 O5	Genistein	3.91928e+06	4.29808e+06	5.1448e+06	2.23255e+06	8.98989e+06	6.08943e+06
	5.04_366.16134	366.161	C18 H26 N2 O4 S	Glibornuride	1.73325e+07	1.50609e+07	1.60895e+07	1.56379e+07	1.58715e+07	1.7607e+07
	0.772_445.17879	445.179	C21 H27 N5 O4 S	Glipizide	5.22797e+07	3.14439e+07	5.70161e+07	2.21407e+07	3.33046e+07	3.3795e+07
	5.198_132.04230	132.042	C5 H8 O4	Glutaric acid	7.3842e+06	7.57686e+06	7.64745e+06	2.98303e+06	7.23349e+06	7.016e+06
	16.033_453.28602	453.286	C21 H44 N O7 P	Glycerophospho-n-palmitoyl ethanolamine	1.31525e+08	1.42305e+08	1.12885e+08	1.1864e+08	1.18708e+08	1.14853e+08
	3.068_188.11635	188.116	C8 H16 N2 O3	Glycyl-l-leucine	4.59891e+06	3.87567e+06	5.45997e+06	773475	1.19825e+07	8.50015e+06
	1.671_238.09549	238.095	C11 H14 N2 O4	Glycyl-L-tyrosine	1.63083e+06	1.20909e+06	2.07795e+06	213015	7.05993e+06	4.68307e+06
	1.103_151.04951	151.05	C5 H5 N5 O	Guanine	6.74851e+07	7.15609e+07	1.01102e+08	2.88877e+07	7.4282e+07	6.79261e+07
	1.111_283.09150	283.091	C10 H13 N5 O5	Guanosine	3.59056e+07	3.73952e+07	6.04513e+07	1.46395e+07	4.12579e+07	3.77353e+07
	21.003_190.13598	190.136	C13 H18 O	Heptanophenone	5.77757e+06	3.89403e+06	2.37261e+06	7.04496e+06	6.6733e+06	4.28314e+06
	20.326_255.25624	255.256	C16 H33 N O	Hexadecanamide	1.34171e+09	1.54267e+09	1.39662e+09	6.00454e+08	1.84912e+09	1.53889e+09
	3.91_182.05820	182.058	C9 H10 O4	Homovanillic acid	843202	807756	925421	2.14263e+06	905974	982121
	5.079_196.07385	196.074	C10 H12 O4	Homoveratrumic acid	2.64779e+06	2.57441e+06	2.40763e+06	1.17306e+06	2.05497e+06	2.34956e+06
	1.534_285.13237	285.132	C17 H19 N O3	Hydromorphone	1.44889e+07	1.42058e+07	1.09894e+07	1.08874e+07	1.03517e+07	1.06466e+07
	6.6_482.23711	482.237	C23 H32 N6 O5 S	Hydroxy vardenafil	5.66018e+06	6.35503e+06	6.49516e+06	1.49634e+07	6.0083e+06	5.97656e+06
	4.413_464.09595	464.096	C21 H20 O12	Hyperoside	1.07543e+07	9.99151e+06	1.51589e+07	1.83332e+07	1.45236e+07	1.1304e+07
	5.474_206.13095	206.131	C13 H18 O2	Ibuprofen	1.42652e+07	1.33711e+07	1.1315e+07	1.88287e+07	1.01132e+07	1.04083e+07
	4.965_261.11141	261.111	C13 H15 N3 O3	Imazapyr	1.80482e+06	1.72057e+06	1.71212e+06	267834	5.0697e+06	3.7022e+06
	6.579_290.09010	290.09	C14 H14 N2 O5	Indole-3-acetyl-l-aspartic acid	1.42343e+07	1.42038e+07	1.43201e+07	1.69479e+07	1.55606e+07	1.51089e+07
	3.767_187.06361	187.064	C11 H9 N O2	Indole-3-acrylic acid	6.44604e+08	6.41254e+08	2.79743e+09	6.51704e+08	7.38414e+08	6.63133e+08
	5.442_205.07414	205.074	C11 H11 N O3	Indole-3-lactic acid	3.63978e+07	3.37092e+07	3.57946e+07	3.08254e+07	2.85402e+07	2.81484e+07
	14.483_428.23304	428.233	C25 H28 N6 O	Irbesartan	5.98554e+07	5.95442e+07	6.72264e+07	1.42996e+07	4.23398e+07	4.62162e+07
	10.411_330.07398	330.074	C17 H14 O7	Iristectorigenin B	1.9009e+06	1.87305e+06	1.90742e+06	659599	1.6609e+06	1.60746e+06
	8.939_368.12602	368.126	C21 H20 O6	Isoanhydroicaritin	6.15543e+06	6.6383e+06	5.35155e+06	6.6507e+06	5.68333e+06	5.88427e+06
	6.277_234.05296	234.053	C12 H8 O4	Isobergapten	2.17295e+06	1.86787e+06	1.28339e+06	2.5611e+06	2.22524e+06	1.43695e+06
	7.852_212.10505	212.105	C11 H14 O3	Isobutyl 4-hydroxybenzoate	3.675e+06	3.3731e+06	3.23407e+06	1.98701e+06	3.04979e+06	3.16382e+06
	7.094_516.12760	516.128	C25 H24 O12	Isochlorogenic acid C	842739	8.57638e+07	814902	611816	943391	939658
	6.679_206.09456	206.095	C12 H14 O3	Isoeugenol acetate	1.15989e+06	1.26975e+06	822856	1.77645e+06	952732	1.23194e+06
	7.467_180.07890	180.079	C10 H12 O3	Isopropyl 4-Hydroxybenzoate	2.70706e+06	2.73942e+06	2.51545e+06	4.33922e+06	2.77041e+06	3.71677e+06
	6.649_464.09596	464.096	C21 H20 O12	Isoquercitrin	6.55978e+07	6.40414e+07	7.81392e+07	2.5369e+07	5.98129e+07	6.37072e+07
	8.866_316.05824	316.058	C16 H12 O7	Isorhamnetin	8.8686e+06	8.20381e+06	8.03897e+06	1.99211e+06	7.7023e+06	7.66104e+06
	4.99_168.04249	168.042	C8 H8 O4	Isovanillic acid	2.84254e+06	2.45628e+06	2.29439e+06	4.87172e+06	2.61789e+06	2.52559e+06
	0.805_315.14235	315.142	C18 H24 N2 O4	Isoxaben	3.41475e+06	3.07656e+06	5.75517e+06	858995	8.4553e+06	7.0121e+06
	9.747_210.12585	210.126	C12 H18 O3	Jasmonic acid	2.02056e+07	1.69144e+07	1.77402e+07	1.05839e+07	1.89264e+07	2.08128e+07
	2.474_313.15251	313.153	C22 H19 N O	Jwh 072	7.5095e+06	6.04241e+06	6.12084e+06	9.13287e+06	9.49069e+06	7.84239e+06
	4.225_327.16817	327.168	C23 H21 N O	Jwh-073	2.34892e+06	2.11541e+06	1.64158e+06	8.03592e+06	719596	1.06589e+06
	6.705_398.20299	398.203	C26 H26 N2 O2	Jwh-193	1.48626e+06	1.38771e+06	1.17459e+06	4.19268e+06	1.20407e+06	1.50017e+06
	6.545_286.04773	286.048	C15 H10 O6	Kaempferol	7.55632e+08	6.82569e+08	8.36551e+08	3.48774e+08	8.01097e+08	8.09633e+08
	6.638_594.15910	594.159	C27 H30 O15	Kaempferol-3-O-rutinoside	9.15727e+07	8.76703e+07	9.56771e+07	9.34081e+07	7.91696e+07	8.43766e+07
	4.686_448.10094	448.101	C21 H20 O11	Kaempferol-7-O-β-D-glucopyranoside	7.19929e+06	7.13712e+06	9.11325e+06	1.09685e+07	8.1758e+06	8.79722e+06
	14.372_314.18578	314.186	C20 H26 O3	Kahweol	5.36425e+06	8.11913e+06	4.14738e+06	3.84474e+06	5.70126e+06	7.07716e+06
	9.596_314.18817	314.188	C20 H26 O3	Kahweol	2.03349e+06	2.02108e+06	1.92011e+06	1.6774e+06	2.00909e+06	1.91365e+06
	0.918_142.02674	142.027	C6 H6 O4	Kojic acid	1.75143e+07	1.91102e+07	2.4589e+07	6.53217e+06	1.46822e+07	2.40161e+07
	4.18_189.04285	189.043	C10 H7 N O3	Kynurenic acid	2.84296e+06	3.33819e+06	2.34748e+06	6.80623e+06	2.35185e+06	2.5292e+06
	0.721_157.08513	157.085	C6 H14 N4 O2	L-(+)-arginine	3.32784e+08	3.54806e+08	5.14077e+08	6.5159e+07	6.19271e+08	3.73434e+08
	0.753_175.09546	175.095	C6 H13 N3 O3	L-(+)-citrulline	6.97283e+08	5.67327e+08	9.35134e+08	1.79409e+09	8.28646e+08	7.1016e+08
	1.466_220.08493	220.085	C11 H12 N2 O3	L-5-hydroxytryptophan	4.08945e+07	3.9787e+07	4.00082e+07	2.85606e+07	4.0677e+07	3.91417e+07
	3.648_186.10068	186.101	C8 H14 N2 O3	L-alanyl-l-proline	5.35638e+06	5.33515e+06	7.39418e+06	3.37043e+06	5.01907e+06	5.04458e+06
	7.132_539.23794	539.238	C26 H34 O11	Lariciresinol 4-o-glucoside	7.8743e+07	7.71918e+07	7.3536e+07	7.69511e+07	7.49042e+07	5.44863e+07
	9.486_354.11036	354.11	C20 H18 O6	L-Asarinin	3.9376e+06	4.44532e+06	3.8168e+06	3.6816e+06	3.85957e+06	4.11752e+06
	19.297_197.17786	197.178	C12 H23 N O	Laurolactam	4.1302e+06	4.39516e+06	3.98335e+06	2.0273e+06	6.07944e+06	5.15108e+06
	11.703_338.20925	338.209	C19 H30 O5	Lauryl gallate	586845	402684	257592	1.09958e+06	351540	440922
	4.14_228.14752	228.148	C11 H20 N2 O3	Leucylproline	3.50568e+07	2.95849e+07	2.87196e+07	7.53406e+06	9.35251e+07	6.49411e+07
	1.101_612.15107	612.151	C20 H32 N6 O12 S2	L-glutathione oxidized	6.82197e+07	5.29928e+07	6.6413e+07	2.23063e+07	9.13268e+07	6.92656e+07
	8.225_322.12051	322.121	C20 H18 O4	Licoflavone A	9.78688e+06	9.41518e+06	9.16474e+06	9.98211e+06	9.41704e+06	8.82098e+06
	5.886_190.09964	190.1	C12 H14 O2	Ligustilide	6.37706e+06	5.47794e+06	5.89062e+06	7.28071e+06	6.75071e+06	7.46248e+06
	14.859_406.21236	406.212	C18 H34 N2 O6 S	Lincomycin	761553	622363	558843	3.03107e+06	982110	626486
	10.311_542.32341	542.323	C28 H48 N4 O3 S	Linoleic acid-biotin	57865	2.00647e+06	242059	39712.8	79248.8	198497
	17.3_306.25582	306.256	C20 H34 O2	Linolenic acid ethyl ester	1.27142e+06	1.09166e+06	652618	3.42146e+06	898216	1.07028e+06
	17.719_323.28244	323.282	C20 H37 N O2	Linoleoyl ethanolamide	1.20375e+08	1.74131e+08	1.08128e+08	1.44769e+08	1.52631e+08	1.69979e+08
	1.403_131.09485	131.095	C6 H13 N O2	L-Isoleucine	7.14941e+08	6.89907e+08	7.13187e+08	6.01448e+08	5.77746e+08	5.51736e+08
	0.869_131.09485	131.095	C6 H13 N O2	L-norleucine	2.79687e+08	2.51141e+08	1.40558e+08	3.0262e+08	1.96172e+08	2.26634e+08
	8.212_382.13914	382.139	C22 H23 Cl N2 O2	Loratadine	8.72045e+07	8.61034e+07	9.81888e+07	7.89779e+07	8.84857e+07	8.69678e+07
	5.505_334.03247	334.032	C16 H12 Cl2 N2 O2	Lormetazepam	3.48078e+06	3.4477e+06	3.81883e+06	2.70291e+06	3.43751e+06	3.42631e+06
	6.818_286.12050	286.12	C17 H18 O4	Loureirin A	6.42038e+06	5.87309e+06	6.18511e+06	4.28632e+06	6.06144e+06	6.059e+06
	5.191_316.13109	316.131	C18 H20 O5	Loureirin B	5.1366e+06	4.65106e+06	4.55564e+06	2.9096e+06	4.81032e+06	4.61664e+06
	1.984_165.07907	165.079	C9 H11 N O2	L-phenylalanine	1.05711e+09	2.30797e+08	8.98261e+08	6.27941e+07	1.03301e+09	9.36023e+08
	0.756_129.04246	129.042	C5 H7 N O3	L-pyroglutamic acid	1.8338e+08	2.81375e+08	3.53725e+08	4.93001e+08	2.60228e+08	2.27053e+08
	3.829_204.09016	204.09	C11 H12 N2 O2	L-tryptophan	2.1797e+09	2.87487e+09	2.84823e+09	1.45066e+09	1.61288e+09	1.5372e+09
	2.861_195.08986	195.09	C10 H13 N O3	L-tyrosine methyl ester	1.00936e+06	1.03682e+06	1.64975e+06	405472	5.07288e+06	2.55999e+06
	1.245_285.08486	285.085	C18 H11 N3 O	Luotonin a	6.57119e+07	6.09996e+07	5.50292e+07	2.92744e+07	5.73431e+07	6.36858e+07
	21.451_424.37066	424.371	C30 H48 O	Lupenone	6.75769e+07	6.65804e+07	7.08574e+07	2.76793e+07	8.21646e+07	6.74716e+07
	22.208_426.38634	426.386	C30 H50 O	Lupeol	4.97103e+06	4.54577e+06	4.10057e+06	9.85688e+06	3.86405e+06	4.18866e+06
	3.023_286.04772	286.048	C15 H10 O6	Luteolin	1.88043e+07	2.12254e+07	2.58746e+07	4.2077e+06	7.21893e+07	4.334e+07
	12.14_258.08925	258.089	C15 H14 O4	Luvangetin	1.49716e+06	1.39546e+06	1.4861e+06	4.65176e+06	1.51681e+06	1.50771e+06
	16.13_966.69215	966.692	C30 H48 O4	Maslinic acid	4.16513e+06	4.55321e+06	4.48439e+06	3.22421e+06	4.13492e+06	4.65205e+06
	8.225_358.14156	358.142	C20 H22 O6	Matairesinol	4.1571e+07	4.23651e+07	4.1921e+07	4.34507e+07	4.38548e+07	4.26872e+07
	5.599_365.16984	365.17	C21 H23 N3 O3	Mda 77	9.80974e+06	9.42481e+06	8.65858e+06	5.77607e+06	9.07314e+06	9.13378e+06
	7.677_406.21852	406.219	C23 H32 N2 O3	Mdmb-chmica	347891	606013	335992	2.86591e+06	733181	266222
	7.422_189.05520	189.055	C17 H16 F6 N2 O	Mefloquine	1.16989e+07	1.21655e+07	1.27681e+07	1.27581e+08	2.07997e+07	1.58779e+07
	1.906_372.18964	372.19	C22 H28 O5	Meprednisone	6.59621e+06	5.9469e+06	4.48814e+06	4.48503e+07	2.50402e+06	3.05759e+06
	4.783_380.10838	380.108	C17 H20 N2 O6 S	Methicillin	5.03904e+06	4.40167e+06	6.23544e+06	1.48831e+06	5.31525e+06	4.807e+06
	1.102_149.05107	149.051	C5 H11 N O2 S	Methionine	3.81758e+07	3.80627e+07	1.60468e+08	1.9183e+07	5.30688e+07	4.08975e+07
	12.987_348.17026	348.17	C16 H26 N2 O5	Methyl (2r)-1-(cyclohexylcarbonyl)-4-(methoxyacetyl)-2-piperazinecarboxylate	620693	2.23077e+06	301709	1.30618e+06	438875	559971
	2.158_332.08956	332.09	C17 H16 O7	Methyl (7-hydroxy-11-methyl-2,9-dioxo-12,15-dioxatetracyclo[8.4.1.01,10 03,8]pentadeca-3,5,7-trien-13-yl)acetate	1.69235e+07	2.01344e+07	1.38543e+07	959125	1.08595e+07	1.35426e+07
	7.445_264.17260	264.173	C16 H24 O3	Methyl 3,5-di-tert-butyl-4-hydroxybenzoate	1.05479e+07	1.02069e+07	7.1905e+06	1.7216e+07	4.50833e+06	8.61521e+06
	6.076_162.06828	162.068	C10 H10 O2	Methyl cinnamate	1.00241e+07	1.00087e+07	9.41284e+06	9.55241e+06	1.06793e+07	1.00905e+07
	8.684_608.22308	608.223	C31 H36 N4 O7 S	Methyl n-{[(2r)-4-[4-(dimethylamino)benzoyl]-1-(phenylsulfonyl)-2-piperazinyl]carbonyl}-o-methyl-l-tyrosinate	1.44095e+07	1.49734e+07	1.49282e+07	1.1352e+07	1.27479e+07	1.29963e+07
	6.077_562.20291	562.203	C28 H33 F N4 O5	Methyl n-{[(2s)-1-(cyclohexylcarbonyl)-4-(3-fluorobenzoyl)-2-piperazinyl]carbonyl}-3-(3-pyridinyl)-d-alaninate	6.76734e+07	6.27915e+07	7.5026e+07	9.01086e+07	6.1838e+07	5.74025e+07
	7.554_500.22414	500.224	C23 H34 N4 O7	Methyl n-{[(2s)-4-(isopropylcarbamoyl)-1-(methoxyacetyl)-2-piperazinyl]carbonyl}-o-methyl-l-tyrosinate	1.47072e+06	1.201e+06	1.14087e+06	2.7987e+06	630266	768969
	6.892_593.13198	593.132	C27 H29 N3 O7 S2	Methyl o-methyl-n-{[(2r)-4-(phenylsulfonyl)-1-(2-thienylcarbonyl)-2-piperazinyl]carbonyl}-l-tyrosinate	1.76781e+06	2.02401e+06	1.93298e+06	380333	1.57262e+06	1.56768e+06
	14.657_287.28241	287.282	C17 H34 O2	Methyl palmitate	3.62923e+07	7.6193e+07	4.58053e+07	2.73226e+07	4.80969e+07	4.98883e+07
	4.722_339.18926	339.189	C20 H25 N3 O2	Methylergonovine	3.20352e+06	3.07891e+06	2.51355e+06	1.24968e+07	2.92209e+06	2.88528e+06
	1.266_268.15360	268.154	C17 H20 N2 O	Michler's ketone	9.89714e+06	8.37111e+06	1.00331e+07	1.47166e+06	3.42144e+07	2.41293e+07
	10.391_542.32341	542.323	C32 H46 O7	Milbemectin a4	38868.3	1.71262e+06	81778.2	51972.4	134957	153302
	5.193_373.17369	373.174	C23 H23 N3 O2	Mn-18 n-(5-hydroxypentyl) metabolite	3.40653e+06	3.02303e+06	2.49753e+06	7.4238e+06	3.47656e+06	3.11452e+06
	5.198_222.08939	222.089	C12 H14 O4	Monobutyl phthalate	1.14936e+07	1.10154e+07	1.11918e+07	4.82935e+06	1.1507e+07	1.09716e+07
	19.836_356.29261	356.293	C21 H40 O4	Monoolein	9.72139e+06	9.16148e+06	9.89405e+06	2.49218e+07	3.14552e+07	1.69162e+07
	8.772_302.04259	302.043	C15 H10 O7	Morin	1.57615e+07	1.34245e+07	1.28943e+07	1.89792e+06	1.51332e+07	1.17324e+07
	5.301_422.17256	422.173	C25 H26 O6	Mulberrin	3.02097e+07	2.75698e+07	2.36148e+07	2.75142e+07	2.17557e+07	2.27404e+07
	19.951_238.22977	238.23	C16 H30 O	Muscone	5.94631e+06	6.50549e+06	5.76463e+06	3.3529e+06	6.36083e+06	7.14987e+06
	7.582_318.03752	318.038	C15 H10 O8	Myricetin	4.88192e+07	4.53334e+07	4.52105e+07	6.52939e+06	5.6226e+07	4.75987e+07
	6.828_318.03749	318.037	C15 H10 O8	Myricetin	1.39102e+06	1.20564e+06	1.54152e+06	2.55278e+06	1.14352e+06	1.24446e+06
	4.336_192.07894	192.079	C11 H12 O3	Myristicin	1.67088e+07	1.69469e+07	1.71852e+07	8.26352e+06	1.67779e+07	1.53327e+07
	12.521_366.23824	366.238	C22 H32 N4 O2	N-({(1s,4s,6s)-6-isopropyl-3-methyl-4-[2-oxo-2-(1-pyrrolidinyl)ethyl]-2-cyclohexen-1-yl}methyl)-2-pyrazinecarboxamide	1.99607e+07	3.03112e+07	1.57561e+07	5.13373e+07	1.88992e+07	2.32355e+07
	9.923_366.18117	366.181	C18 H26 N2 O6	N-({(2r,3s,4r,5s)-3,4-dihydroxy-5-[2-(isopropylamino)-2-oxoethyl]tetrahydro-2-furanyl}methyl)-4-methoxybenzamide	7.51153e+06	5.95325e+06	3.96322e+06	6.4005e+06	5.57301e+06	6.08007e+06
	5.695_328.14226	328.142	C18 H22 N2 O5	N-({(2r,3s,4r,5s)-3,4-dihydroxy-5-[2-oxo-2-(2-propyn-1-ylamino)ethyl]tetrahydro-2-furanyl}methyl)-4-methylbenzamide	2.32624e+06	2.56454e+06	2.48581e+06	836805	9.99849e+06	6.81287e+06
	8.644_368.21752	368.218	C21 H28 N4 O2	N-({(2r,4s,5r)-5-[3-(2-methoxyphenyl)-1-methyl-1h-pyrazol-5-yl]-1-azabicyclo[2.2.2]oct-2-yl}methyl)acetamide	757381	655096	293948	1.57691e+06	356738	632167
	15.194_502.17900	502.179	C24 H30 N4 O4 S2	N-({(2r,4s,5r)-5-[3-(3,4-dimethoxyphenyl)-1-methyl-1h-pyrazol-5-yl]-1-azabicyclo[2.2.2]oct-2-yl}methyl)-2-thiophenesulfonamide	1.61589e+07	1.73527e+07	2.36294e+07	1.18673e+07	3.48864e+07	2.99885e+07
	5.662_404.16594	404.166	C23 H26 N4 O2 S	N-({(2r,4s,5r)-5-[6-(2-furyl)-2-methyl-4-pyrimidinyl]-1-azabicyclo[2.2.2]oct-2-yl}methyl)-2-(2-thienyl)acetamide	1.00263e+07	1.39152e+07	1.4717e+07	2.61914e+07	6.7211e+06	7.83017e+06
	2.787_446.14036	446.14	C18 H23 F3 N4 O7	N-(1-amino-1-oxo-2-propanyl)-1,3,4-trihydroxy-5-({[4-(trifluoromethoxy)phenyl]carbamoyl}amino)cyclohexanecarboxamide	3.07096e+07	1.89718e+07	2.91054e+07	4.22378e+07	3.04564e+07	2.0237e+07
	2.026_424.17073	424.171	C24 H20 N6 O2	N-(2-{4-[5-(acetylamino)-1h-benzimidazol-2-yl]phenyl}-1h-benzimidazol-5-yl)acetamide	2.62211e+06	3.02151e+06	4.06672e+06	3.63457e+06	3.41018e+06	2.84921e+06
	4.048_360.13988	360.14	C20 H25 Cl N2 S	N-(2-chloro-4-methylphenyl)-n'-(2,4,6-triethylphenyl)thiourea	3.71091e+06	3.02317e+06	3.19855e+06	2.51052e+06	2.93192e+06	2.68913e+06
	1.512_371.08995	371.09	C19 H12 F3 N3 O2	N-(3-cyano-1h-indol-5-yl)-3-[4-(trifluoromethoxy)phenyl]acrylamide	4.33169e+06	4.69756e+06	4.41571e+06	593183	3.33024e+06	3.53315e+06
	3.918_322.10276	322.103	C15 H18 N2 O4 S	N-(4-ethyl-2-pyridinyl)-3,4-dimethoxybenzenesulfonamide	4.52767e+06	3.23087e+06	5.04416e+06	723205	4.25508e+06	3.03137e+06
	9.371_478.19973	478.2	C24 H32 N4 O3 S	N-(4-methoxybenzyl)-3-[(2s,5as,8ar)-1-methyl-5-oxo-6-(2-thienylmethyl)decahydropyrrolo[3,2-e][1,4]diazepin-2-yl]propanamide	3.30074e+06	3.53515e+06	3.10932e+06	4.96637e+06	2.96036e+06	3.19045e+06
	4.959_359.13695	359.137	C19 H22 Cl N3 O2	N-(5-chloro-2-methoxyphenyl)-n'-(4-piperidinophenyl)urea	7.62734e+07	6.78914e+07	6.35582e+07	1.34089e+08	6.59942e+07	6.22573e+07
	3.914_416.18672	416.187	C22 H23 F3 N4 O	N,n-dimethyl-4-(5-{(3s)-1-[4-(trifluoromethyl)benzyl]-3-pyrrolidinyl}-1,3,4-oxadiazol-2-yl)aniline	1.06274e+07	1.12295e+07	9.0391e+06	8.27541e+06	9.26946e+06	9.31905e+06
	22.023_309.30323	309.303	C20 H41 N O2	N,n-dimethylsphingosine	6.54397e+08	7.7125e+08	7.23761e+08	3.64491e+08	1.01233e+09	8.30638e+08
	5.02_418.18423	418.184	C24 H23 F N4 O2	N-[(1r,9s)-11-(4-fluorobenzyl)-6-oxo-7,11-diazatricyclo[7.3.1.02,7]trideca-2,4-dien-5-yl]isonicotinamide	4.39378e+07	4.23979e+07	4.24014e+07	3.68476e+07	4.11811e+07	4.0484e+07
	17.447_560.27532	560.275	C31 H42 N2 O5	N-[(1s,2s,8s,8as)-8-hydroxy-7-{(2s)-1-[(4-methoxybenzyl)amino]-1-oxo-2-propanyl}-1,4a-dimethyldecahydro-2-naphthalenyl]-4-methoxybenzamide	669269	665636	582407	2.48206e+06	1.08438e+06	762354
	6.043_454.12450	454.125	C21 H19 F3 N4 O3	N-[(3s,5s)-1-methyl-5-{3-[4-(trifluoromethoxy)phenyl]-1,2,4-oxadiazol-5-yl}-3-pyrrolidinyl]benzamide	2.12692e+07	1.9346e+07	2.31747e+07	8.91055e+06	1.87109e+07	2.04233e+07
	7.517_446.13472	446.135	C22 H24 N4 O4	N-[4-({(2s,4r)-4-hydroxy-2-[3-(4-methoxyphenyl)-1,2,4-oxadiazol-5-yl]-1-pyrrolidinyl}methyl)phenyl]acetamide	2.92684e+06	3.40856e+06	3.30443e+06	2.34623e+06	3.31558e+06	3.66155e+06
	0.744_454.10822	454.108	C20 H24 N4 O4 S	N-[5,10-dioxo-1-(2-thienylacetyl)dodecahydrodipyrrolo[1,2-a:3',2'-e][1,4]diazepin-7-yl]cyclopropanecarboxamide	2.88204e+07	3.33901e+07	2.98964e+07	2.3372e+07	2.7653e+07	3.5919e+07
	9.33_396.25145	396.251	C21 H38 N2 O4 S	N-{(1s,2s,8s,8as)-8-hydroxy-1,4a-dimethyl-7-[(2s)-1-oxo-1-(1-piperidinyl)-2-propanyl]decahydro-2-naphthalenyl}methanesulfonamide	417279	271403	222196	957133	188703	234202
	7.422_420.12104	420.121	C17 H24 N4 O3 S	N-{(3s,5s)-1-methyl-5-[3-(4-methylphenyl)-1,2,4-oxadiazol-5-yl]-3-pyrrolidinyl}-1-propanesulfonamide	410256	346566	370205	5.32814e+06	812193	473945
	9.582_398.17064	398.171	C22 H24 N4 O2	N-{(3s,5s)-1-methyl-5-[3-(4-methylphenyl)-1,2,4-oxadiazol-5-yl]-3-pyrrolidinyl}-2-phenylacetamide	1.51415e+06	1.41385e+06	1.16221e+06	436085	1.14029e+06	1.12976e+06
	8.616_434.11916	434.119	C21 H21 Cl N4 O3	N-{(3s,5s)-5-[3-(4-chlorophenyl)-1,2,4-oxadiazol-5-yl]-1-methyl-3-pyrrolidinyl}-2-phenoxyacetamide	1.56006e+07	1.40016e+07	1.09735e+07	832705	1.16928e+07	1.22562e+07
	4.907_405.10374	405.104	C19 H18 Cl N5 O2	N-{(3s,5s)-5-[3-(4-chlorophenyl)-1,2,4-oxadiazol-5-yl]-1-methyl-3-pyrrolidinyl}-2-pyridinecarboxamide	2.23477e+06	1.93642e+06	2.23462e+06	2.47355e+06	2.37171e+06	2.31579e+06
	8.802_470.21329	470.213	C26 H29 F N4 O2	N-{[(1s,4s,6s)-4-{[5-(2-fluorophenyl)-1,3,4-oxadiazol-2-yl]methyl}-6-isopropyl-3-methyl-2-cyclohexen-1-yl]methyl}isonicotinamide	2.01366e+07	2.22643e+07	1.98462e+07	2.22236e+07	1.63883e+07	1.64944e+07
	14.226_432.22802	432.228	C24 H28 N6 O2	N-{[(1s,4s,6s)-6-isopropyl-3-methyl-4-{[5-(4-pyridinyl)-1,3,4-oxadiazol-2-yl]methyl}-2-cyclohexen-1-yl]methyl}-2-pyrazinecarboxamide	4.67158e+07	4.87428e+07	4.90583e+07	1.14534e+07	7.64673e+07	6.61051e+07
	6.127_367.15346	367.153	C20 H23 N3 O5	N-{[(2r,3s,4r,5s)-3,4-dihydroxy-5-{2-oxo-2-[(3-pyridinylmethyl)amino]ethyl}tetrahydro-2-furanyl]methyl}benzamide	895435	615767	801448	236392	3.13244e+06	2.59144e+06
	2.06_391.17381	391.174	C19 H27 N3 O7	N-{[(2r,3s,4s,5s)-5-(2-{[2-(dimethylamino)ethyl]amino}-2-oxoethyl)-3,4-dihydroxytetrahydro-2-furanyl]methyl}-1,3-benzodioxole-5-carboxamide	3.155e+06	2.59199e+06	2.23117e+06	1.46697e+06	2.83394e+06	2.66186e+06
	4.277_409.23134	409.231	C22 H30 F3 N3 O	N-{[(2r,4s,5s)-5-(1-piperidinylmethyl)-1-azabicyclo[2.2.2]oct-2-yl]methyl}-4-(trifluoromethyl)benzamide	3.89888e+06	5.45037e+06	3.65676e+06	6.9824e+06	4.57135e+06	3.9287e+06
	8.075_526.24010	526.24	C27 H32 F4 N4 O	N-{[(2r,4s,5s)-5-{[4-(4-fluorophenyl)-1-piperazinyl]methyl}-1-azabicyclo[2.2.2]oct-2-yl]methyl}-4-(trifluoromethyl)benzamide	491371	444851	471673	4.1009e+06	477673	473740
	6.283_475.24233	475.242	C25 H37 N3 O4 S	N-{4-[({(1s,4s,6s)-6-isopropyl-3-methyl-4-[2-oxo-2-(1-pyrrolidinyl)ethyl]-2-cyclohexen-1-yl}methyl)sulfamoyl]phenyl}acetamide	1.83207e+06	1.72383e+06	1.65487e+06	686951	1.76769e+06	1.56151e+06
	13.781_350.18600	350.186	C18 H26 N2 O5	N-{4-[(2r,3r)-3-(hydroxymethyl)-4-isobutyl-5-oxo-2-morpholinyl]phenyl}-2-methoxyacetamide	4.47501e+06	2.84249e+06	1.32988e+06	9.33101e+06	2.09284e+06	2.93605e+06
	4.71_392.10839	392.108	C20 H22 N2 O4	N-{4-[(2r,3r)-3-(hydroxymethyl)-4-methyl-5-oxo-2-morpholinyl]phenyl}-2-methylbenzamide	1.04874e+07	9.89947e+06	1.12737e+07	7.11289e+06	1.14207e+07	1.0921e+07
	4.507_390.14922	390.149	C21 H24 N2 O4	N-{4-[(2r,3r)-3-(hydroxymethyl)-4-methyl-5-oxo-2-morpholinyl]phenyl}-3-phenylpropanamide	2.54796e+06	3.26748e+06	5.12993e+06	2.49674e+06	3.42144e+06	2.39707e+06
	2.855_278.12676	278.127	C14 H18 N2 O4	N-{4-[(2r,3r)-3-(hydroxymethyl)-4-methyl-5-oxo-2-morpholinyl]phenyl}acetamide	5.81579e+06	5.83949e+06	5.62048e+06	1.17517e+06	1.9692e+07	1.33453e+07
	6.888_349.20017	349.2	C18 H24 N2 O4	N-{4-[(2r,3r)-3-(hydroxymethyl)-4-methyl-5-oxo-2-morpholinyl]phenyl}cyclopentanecarboxamide	1.18309e+06	1.30114e+06	1.29879e+06	577013	1.98853e+06	1.78717e+06
	8.061_356.14711	356.147	C18 H22 N4 O5	N-{5,6-dihydroxy-3-[(2-oxo-3-piperidinyl)carbamoyl]-2-cyclohexen-1-yl}nicotinamide	2.30791e+06	2.22949e+06	2.29986e+06	1.75348e+06	2.53258e+06	2.43747e+06
	6.533_494.23719	494.237	C26 H36 N4 O3 S2	N-{5-hydroxy-4,8a-dimethyl-6-[1-oxo-1-(4-thiomorpholinyl)-2-propanyl]-4,4a,5,6,7,8,8a,9-octahydronaphtho[2,3-d][1,3]thiazol-2-yl}-1-methyl-1h-pyrrole-2-carboxamide	8.07019e+06	6.55451e+06	9.43283e+06	9.88775e+06	3.96792e+06	4.77098e+06
	2.326_354.09269	354.093	C15 H19 Cl N4 O2 S	N1-(4-chlorophenyl)-2-[(5-hydroxy-4-pentyl-4h-1,2,4-triazol-3-yl)thio]acetamide	3.79149e+06	3.69357e+06	5.63899e+06	6.20865e+06	4.11386e+06	4.34107e+06
	5.077_319.11680	319.117	C18 H16 F3 N O	N1-(6-methoxy-1,2,3,4-tetrahydro-1-naphthalenyliden)-2-(trifluoromethyl)aniline	2.58357e+06	3.63408e+06	2.44953e+06	609043	5.15912e+06	4.33983e+06
	5.45_352.13694	352.137	C15 H18 N4 O5	N1-[3-(1h-imidazol-1-yl)propyl]-2,6-dimethoxy-3-nitrobenzamide	1.918e+06	1.82103e+06	1.21599e+06	1.48199e+07	790293	764313
	4.691_364.05616	364.056	C16 H16 N2 O4 S2	N3-phenyl-4-hydroxy-1,5,6-trimethyl-2,2-dioxo-1,2-dihydro-2λ6-thieno[2,3-c][1,2]thiazine-3-carboxamide	6.09152e+06	3.38145e+06	5.58418e+06	2.65877e+06	7.35336e+06	7.04524e+06
	5.073_277.09493	277.095	C14 H16 Cl N3 O	N4-(4-chlorophenyl)-1-methyl-5-propyl-1h-pyrazole-4-carboxamide	95059.9	402296	832504	6.27673e+06	443786	174262
	1.103_188.11633	188.116	C8 H16 N2 O3	N6-acetyl-l-lysine	3.14923e+06	4.2959e+06	4.01283e+06	2.91258e+06	9.90682e+06	8.45698e+06
	0.762_383.14183	383.142	C14 H25 N O11	N-acetyl-d-lactosamine	2.04882e+07	2.15626e+07	2.35796e+07	5.07285e+06	2.16939e+07	2.04336e+07
	0.829_175.04832	175.048	C6 H9 N O5	N-Acetyl-L-aspartic acid	3.257e+06	3.94354e+06	7.2209e+06	4.44508e+06	2.36933e+06	3.13135e+06
	3.888_191.06186	191.062	C7 H13 N O3 S	N-Acetyl-L-methionine	7.07816e+06	7.15955e+06	9.93468e+06	1.5963e+06	1.27918e+07	9.3091e+06
	5.782_207.08976	207.09	C11 H13 N O3	N-Acetyl-L-phenylalanine	1.29112e+07	1.20839e+07	1.05907e+07	1.09306e+07	1.10996e+07	1.14585e+07
	0.753_174.10026	174.1	C7 H14 N2 O3	N-acetylornithine	3.33842e+07	2.94586e+07	4.35012e+07	6.72314e+07	3.84712e+07	1.92288e+07
	17.131_341.29293	341.293	C20 H39 N O3	N-acetylsphingosine	5.05443e+07	4.01965e+07	3.23481e+07	1.2823e+07	1.04509e+07	1.98312e+07
	4.818_179.09486	179.095	C10 H13 N O2	N-acetyltyramine	2.18741e+06	2.27565e+06	2.28168e+06	860595	1.05397e+07	6.72216e+06
	11.639_357.19403	357.194	C21 H27 N O4	Nalbuphine	1.99067e+06	1.27974e+06	1.09142e+06	1.48212e+06	981517	985866
	4.551_339.18926	339.189	C21 H25 N O3	Nalmefene	8.89301e+06	9.55061e+06	8.7205e+06	2.814e+07	9.8493e+06	1.00244e+07
	1.501_341.16851	341.169	C20 H23 N O4	Naltrexone	2.98605e+07	2.57483e+07	2.60605e+07	9.19582e+06	1.88677e+07	2.20347e+07
	7.884_272.06853	272.069	C15 H12 O5	Naringenin	1.76177e+07	1.67061e+07	1.67527e+07	1.19877e+07	1.67277e+07	1.79309e+07
	6.284_272.06851	272.069	C15 H12 O5	Naringenin	3.96508e+06	4.24485e+06	4.73816e+06	3.85496e+06	3.73438e+06	4.06218e+06
	6.578_484.19270	484.193	C26 H30 N4 O3	Nat13-331713_pos	1.74097e+06	2.18287e+06	2.47026e+06	5.1084e+06	1.49976e+06	2.11905e+06
	1.118_135.06856	135.069	C8 H9 N O	N-benzylformamide	5.36646e+07	5.65874e+07	6.72833e+07	4.3469e+07	4.68323e+07	4.37967e+07
	16.268_462.21567	462.216	C28 H31 Cl N2 O2	N-desmethyl-loperamide	7.54057e+06	8.41791e+06	8.64171e+06	1.35737e+06	4.04402e+06	4.5175e+06
	2.796_469.21644	469.216	C25 H32 Cl N5 O2	Nefazodone	1.22709e+07	1.02658e+07	9.00879e+06	1.99167e+07	1.42543e+07	1.6488e+07
	12.501_624.32254	624.323	C38 H44 N2 O6	Neferine	1.30904e+06	1.1053e+07	2.85595e+06	3.37282e+06	2.9978e+06	4.45909e+06
	8.664_216.07887	216.079	C13 H12 O3	Nepodin	2.20297e+06	2.97968e+06	2.21546e+06	2.49343e+06	2.2334e+06	2.1592e+06
	1.1_663.10866	663.109	C21 H27 N7 O14 P2	Nicotinamide adenine dinucleotide (nad+)	2.15618e+07	2.099e+07	2.09655e+07	3.52993e+06	2.41266e+07	2.10988e+07
	0.788_159.08943	159.089	C7 H13 N O3	N-Isovalerylglycine	6.42102e+07	6.87538e+07	7.275e+07	6.93663e+07	6.61076e+07	5.95852e+07
	4.67_275.11576	275.116	C15 H17 N O4	Norbenzoylecgonine	8.44908e+06	5.72239e+06	7.17988e+06	2.27661e+06	1.51367e+07	6.29526e+06
	1.148_259.15327	259.153	C16 H21 N O2	Norbutorphanol	1.04558e+07	1.15155e+07	1.18945e+07	9.79153e+06	3.49834e+07	4.13737e+07
	8.158_192.04257	192.043	C10 H8 O4	Noreugenin	3.68916e+06	3.1244e+06	2.79843e+06	2.18729e+06	2.89375e+06	3.07747e+06
	0.794_337.14813	337.148	C16 H18 F N3 O3	Norfloxacin	1.11643e+07	1.64419e+07	1.97861e+07	1.71997e+07	2.81547e+07	1.4725e+07
	18.183_440.27530	440.275	C26 H36 N2 O4	Norverapamil	5.27884e+06	4.29639e+06	3.71719e+06	1.15881e+06	2.90214e+06	3.36962e+06
	0.817_188.11615	188.116	C8 H16 N2 O3	N-α-Acetyl-L-lysine	1.55787e+07	1.33179e+07	1.65654e+07	1.37698e+07	2.76759e+07	2.61031e+07
	7.002_366.22674	366.227	C23 H30 N2 O2	Ohmefentanyl	2.71177e+06	2.23677e+06	1.93656e+06	2.02361e+06	1.68371e+06	2.05901e+06
	20.366_281.27144	281.271	C18 H35 N O	Oleamide	6.27981e+07	3.34825e+08	4.23268e+08	1.5556e+08	1.06507e+08	4.5878e+08
	21.233_438.34996	438.35	C30 H48 O3	Oleanolic acid	5.23948e+06	5.97591e+06	3.82987e+06	1.35596e+07	5.27584e+06	4.85361e+06
	19.136_325.29792	325.298	C20 H39 N O2	Oleoyl ethanolamide	7.37075e+06	1.80146e+07	6.19777e+06	3.65887e+06	1.70416e+07	1.32431e+07
	11.588_250.19339	250.193	C16 H26 O2	Opeo	3.9348e+06	2.86524e+06	1.90134e+06	1.93158e+07	3.52499e+06	3.90835e+06
	6.837_448.15842	448.158	C19 H28 O12	Orcinol gentiobioside	3.5581e+06	3.07008e+06	2.80586e+06	6.27818e+06	1.76694e+06	1.68185e+06
	4.502_286.10539	286.105	C13 H18 O7	Orcinol glucoside	887058	633089	945578	1.06527e+06	538954	679636
	5.488_168.04249	168.042	C8 H8 O4	Orsellinic acid	8.57347e+06	8.79091e+06	9.04421e+06	4.77038e+06	9.32035e+06	9.12502e+06
	1.392_152.03366	152.034	C5 H4 N4 O2	Oxipurinol	1.63815e+07	1.50713e+07	1.12868e+07	1.1739e+07	8.38226e+06	1.18159e+07
	6.072_497.19160	497.192	C23 H28 O11	Paeoniflorin	3.37018e+06	2.99409e+06	2.87775e+06	1.78182e+06	3.48251e+06	2.89325e+06
	8.805_166.06322	166.063	C9 H10 O3	Paeonol	1.01012e+06	1.02777e+06	804329	1.15697e+06	909436	880642
	15.745_254.22420	254.224	C16 H30 O2	Palmitoleic acid	2.71491e+06	1.64885e+06	1.23109e+06	3.95943e+06	1.94827e+06	2.59264e+06
	18.923_299.28224	299.282	C18 H37 N O2	Palmitoyl ethanolamide	8.85417e+06	2.14293e+07	7.15613e+06	1.31583e+07	1.58724e+07	1.32247e+07
	6.94_164.04746	164.047	C9 H8 O3	p-Coumaric acid	7.76394e+06	6.69368e+06	6.42988e+06	204086	5.60792e+06	5.35073e+06
	6.103_314.07897	314.079	C17 H14 O6	Pectolinarigenin	634632	387115	750304	1.44716e+06	378168	541941
	9.51_622.18149	622.181	C29 H34 O15	Pectolinarin	1.4972e+06	1.64682e+06	1.44074e+06	2.3515e+06	1.34195e+06	1.46461e+06
	19.152_512.33324	512.333	C26 H50 O8	Peg diethylhexanoate n5	1.51384e+06	812972	318700	1.52036e+06	549723	1.09115e+06
	17.122_393.30913	393.309	C20 H40 O6	Peg monolaurate n4	239146	2.2645e+06	165834	13652.7	45789.1	58446.4
	16.024_460.30415	460.304	C22 H44 O7	Peg monolaurate n5	471794	374322	372392	1.12053e+07	362611	626233
	17.073_481.36199	481.362	C24 H48 O8	Peg monolaurate n6	662835	2.93589e+06	511617	114274	134424	206324
	17.034_525.38860	525.389	C26 H52 O9	Peg monolaurate n7	766583	2.88822e+06	570328	90400.3	153963	193685
	6.29_519.32645	519.326	C22 H46 O12	Peg n11	9.02991e+06	1.13666e+07	6.17391e+06	5.60808e+06	2.97522e+06	5.88591e+06
	6.523_563.35211	563.352	C24 H50 O13	Peg n12	6.61104e+06	1.02427e+07	5.11601e+06	3.21702e+06	1.88209e+06	4.92657e+06
	6.732_607.37875	607.379	C26 H54 O14	Peg n13	4.11587e+06	6.4296e+06	3.08345e+06	1.28459e+06	1.16093e+06	3.10573e+06
	6.925_651.40416	651.404	C28 H58 O15	Peg n14	2.02782e+06	2.75839e+06	1.22785e+06	439495	392217	1.26184e+06
	5.571_523.16993	523.17	C28 H27 Cl F5 N O	Penfluridol	2.51098e+06	2.31743e+06	2.30537e+06	863328	1.41695e+06	1.79757e+06
	7.437_340.18614	340.186	C19 H24 N4 O2	Pentamidine	2.13385e+06	2.09182e+06	1.42757e+06	4.76921e+06	877170	1.64365e+06
	10.505_150.10471	150.105	C10 H14 O	Perillene	7.94232e+06	5.54926e+06	4.0402e+06	8.23315e+06	5.10756e+06	6.56155e+06
	2.053_403.14552	403.146	C21 H26 Cl N3 O S	Perphenazine	1.17564e+06	820964	692481	4.59627e+06	833305	765685
	9.511_264.09981	264.1	C14 H16 O5	Peucedanol	975818	833836	766997	1.15504e+06	715404	759074
	12.495_434.31877	434.319	C24 H42 N4 O3	Philanthotoxin 74	2.15594e+06	8.50065e+07	4.93449e+06	9.25458e+06	5.09725e+06	8.50905e+06
	10.742_372.15734	372.157	C21 H24 O6	Phillygenin	6.4843e+06	5.69293e+06	5.40277e+06	4.6316e+06	4.29405e+06	5.5468e+06
	9.619_274.08425	274.084	C15 H14 O5	Phloretin	6.17088e+07	5.7688e+07	6.37578e+07	2.17693e+07	6.54933e+07	6.03199e+07
	7.045_274.08415	274.084	C15 H14 O5	Phloretin	2.90672e+06	2.53642e+06	2.84272e+06	247754	2.88806e+06	2.5843e+06
	6.983_436.13727	436.137	C21 H24 O10	Phloridzin	1.53165e+07	1.65807e+07	2.04475e+07	9.16599e+06	2.55253e+07	2.55268e+07
	7.641_458.11937	458.119	C21 H24 O10	Phlorizin	1.99335e+06	2.46953e+06	2.93507e+06	1.59531e+06	2.7419e+06	2.91259e+06
	5.692_244.07365	244.074	C14 H12 O4	Piceatannol	2.51373e+06	2.41087e+06	2.9972e+06	2.57045e+06	2.70514e+06	2.81637e+06
	4.523_431.15830	431.158	C22 H22 O8	Picropodophyllotoxin	2.04345e+07	2.04792e+07	1.61645e+07	264473	1.44788e+07	1.29533e+07
	6.045_461.22652	461.227	C28 H29 F2 N3 O	Pimozide	2.17164e+08	2.11186e+08	2.45547e+08	6.7278e+07	2.40566e+08	2.41047e+08
	12.142_256.07369	256.074	C15 H12 O4	Pinocembrin	866557	842293	779156	1.01454e+06	820797	879483
	0.804_129.07907	129.079	C6 H11 N O2	Pipecolic acid	1.54379e+09	1.43203e+09	2.10482e+09	1.1015e+08	1.2984e+09	1.47159e+09
	1.125_240.14698	240.147	C12 H20 N2 O3	Pirbuterol	9.6693e+07	8.23263e+07	1.11246e+08	7.49524e+07	1.08617e+08	8.17253e+07
	1.457_305.09325	305.093	C11 H20 N3 O3 P S	Pirimiphos methyl	5.32755e+06	4.89342e+06	5.35795e+06	1.04559e+07	4.90769e+06	4.89048e+06
	6.827_390.13170	390.132	C20 H22 O8	Polydatin	750331	646082	641317	1.04574e+06	536423	618245
	21.155_488.31436	488.314	C29 H44 O6	Polygalic acid	2.67414e+06	2.40331e+06	2.54472e+06	3.07377e+06	4.8623e+06	3.18962e+06
	15.518_616.37590	616.376	C30 H58 O11	Ppg acrylate n9	969007	771455	629339	2.68884e+06	406583	739865
	8.664_324.09972	324.1	C19 H17 Cl N2 O	Prazepam	4.67583e+06	5.03271e+06	4.41774e+06	5.44703e+06	4.5328e+06	4.82148e+06
	5.427_373.13495	373.135	C20 H24 Cl N3 S	Prochlorperazine	1.50391e+07	2.53777e+07	2.74985e+07	1.69588e+07	1.23437e+07	1.25319e+07
	4.21_578.14302	578.143	C30 H26 O12	Procyanidin B2	1.01966e+08	9.0748e+07	1.11153e+08	6.06156e+07	9.87757e+07	9.26564e+07
	0.815_228.14721	228.147	C11 H20 N2 O3	Prolylleucine	7.78419e+07	7.49795e+07	9.99328e+07	7.06981e+07	7.4503e+07	8.01343e+07
	7.733_296.16000	296.16	C17 H20 N4 O	Propizepine	2.41522e+06	1.84923e+06	1.23332e+06	6.40438e+06	1.06168e+06	2.10622e+06
	1.212_259.15328	259.153	C16 H21 N O2	Propranolol	3.29274e+06	3.99301e+06	2.04017e+06	1.34876e+06	2.31925e+07	6.12198e+06
	12.942_530.28662	530.287	C30 H42 O8	Proscillaridin a	1.39351e+06	2.43875e+06	1.45402e+06	2.53935e+07	2.07031e+06	1.94792e+06
	13.839_336.22768	336.228	C20 H34 O5	Prostaglandin e1	638813	576092	154684	1.07187e+06	269373	513329
	14.719_684.39030	684.39	C35 H58 N4 O6 S	Prostaglandin e2-biotin	1.59284e+06	1.5847e+06	1.54631e+06	7.77507e+06	5.62721e+06	3.31509e+06
	11.853_353.25658	353.257	C20 H32 O4	Prostaglandin f2α 1,9-lactone	352718	1.9515e+06	115425	5.18422e+06	391227	186236
	9.991_371.26827	371.268	C20 H34 O5	Prostaglandin h1	390556	100770	151025	5.58937e+06	139177	257146
	12.717_332.19636	332.196	C20 H30 O5	Prostaglandin k2	7.65042e+06	8.28186e+06	5.35256e+06	6.87264e+06	7.05756e+06	6.57977e+06
	12.326_417.21534	417.215	C23 H31 N O6	Protostemonine	8.29892e+06	7.8603e+06	9.9102e+06	4.3606e+06	8.27467e+06	8.86681e+06
	7.884_434.12166	434.122	C21 H22 O10	Prunin	4.69443e+06	4.6023e+06	5.4014e+06	3.09439e+06	5.02785e+06	5.07524e+06
	8.095_449.20537	449.205	C23 H28 O8	Pseudolaric acid B	997685	962414	826586	4.31268e+06	801676	836884
	5.627_390.16799	390.168	C21 H26 O7	Pseudolaric acid C	4.07442e+06	4.24302e+06	3.87244e+06	3.36983e+06	3.4582e+06	3.2281e+06
	1.102_169.07396	169.074	C8 H11 N O3	Pyridoxine	3.48848e+07	3.09407e+07	3.38707e+07	2.56511e+07	3.64954e+07	3.21917e+07
	6.189_302.04260	302.043	C15 H10 O7	Quercetin	8.52551e+07	6.70476e+07	1.03037e+08	2.61275e+07	5.7784e+07	7.24025e+07
	6.588_478.07531	478.075	C21 H18 O13	Quercetin 3-O-β-D-Glucuronide	7.02477e+06	6.95911e+06	7.17471e+06	39611.7	7.00374e+06	6.29265e+06
	5.074_788.20023	788.2	C33 H40 O22	Quercetin-3-O-β-D-glucose-7-O-β-D-gentiobioside	1.44139e+06	1.46528e+06	1.55042e+06	1.07744e+06	1.34219e+06	1.2339e+06
	14.809_486.33513	486.335	C30 H46 O5	Quillaic acid	1.65458e+06	1.97869e+06	1.57047e+06	4.84938e+06	1.55152e+06	1.82963e+06
	3.834_129.05797	129.058	C9 H7 N	Quinoline	3.99439e+06	4.88175e+06	5.00786e+06	3.88227e+06	3.30646e+06	4.14832e+06
	15.604_362.18593	362.186	C19 H26 N2 O5	Remifentanil acid	916990	1.0356e+06	705175	1.71552e+06	1.02831e+06	937562
	6.523_228.07874	228.079	C14 H12 O3	Resveratrol	4.03521e+06	4.34172e+06	4.97579e+06	4.414e+06	4.41612e+06	4.74363e+06
	5.198_456.07196	456.072	C20 H18 O11	Reynoutrin	1.56498e+07	1.09866e+07	1.25874e+07	5.14805e+06	9.38208e+06	1.33843e+07
	8.771_600.14623	600.146	C27 H30 O14	Rhoifolin	17473.1	3.71916e+06	19384.3	14025.9	17676	17222.3
	0.76_542.12478	542.125	C30 H22 O10	Rhusflavanone	1.4149e+08	1.13551e+08	1.27298e+08	2.70605e+08	9.67475e+07	1.57203e+08
	17.633_440.36571	440.366	C30 H48 O2	Roburic acid	1.38969e+07	1.38683e+07	1.55183e+07	5.0355e+06	1.61678e+07	1.33266e+07
	10_667.43131	667.431	C36 H58 O10	Rosamultin	6.19673e+06	6.5517e+06	6.624e+06	8.897e+07	6.36686e+06	6.39013e+06
	5.147_445.19487	445.195	C20 H28 O10	Rosavin	4.65818e+06	4.14907e+06	4.44798e+06	3.84422e+06	4.53803e+06	4.89054e+06
	5.256_357.12132	357.121	C18 H19 N3 O3 S	Rosiglitazone	2.34288e+06	2.19489e+06	2.32106e+06	647155	6.93539e+06	3.93333e+06
	5.256_486.18582	486.186	C26 H30 O9	Rutaevin	6.68113e+06	6.73215e+06	7.34157e+06	6.13816e+06	5.82578e+06	6.50594e+06
	6.238_610.15311	610.153	C27 H30 O16	Rutin	4.29294e+07	4.45578e+07	4.31151e+07	2.98021e+07	4.00573e+07	4.2372e+07
	1.092_192.06075	192.061	C14 H20 N6 O5 S	S-adenosylhomocysteine	1.05854e+07	1.05501e+07	1.06653e+07	4.29802e+06	7.22141e+06	7.33555e+06
	4.375_470.11964	470.12	C22 H24 O10	Sakuranin	4.91109e+06	2.1207e+06	2.50807e+06	2.28088e+06	3.86172e+06	2.65225e+06
	1.65_390.17142	390.171	C21 H26 O7	Salvinorin b	7.28312e+06	6.88016e+06	8.09262e+06	7.04428e+06	7.18723e+06	6.88444e+06
	5.084_226.08427	226.084	C11 H14 O5	Sarracenin	6.5619e+06	6.26013e+06	6.10267e+06	3.49129e+06	5.54569e+06	5.65322e+06
	9.244_356.12607	356.126	C20 H20 O6	Sauchinone	4.48669e+07	4.09706e+07	3.80224e+07	4.33422e+07	3.34618e+07	3.73426e+07
	7.109_384.15761	384.158	C22 H24 O6	Schisandrin C	2.58436e+06	2.43041e+06	2.42928e+06	2.18267e+06	2.23704e+06	2.39857e+06
	6.54_192.04257	192.043	C10 H8 O4	Scopoletin	3.67327e+07	6.26007e+07	4.09677e+07	1.55866e+07	3.12509e+07	3.12282e+07
	4.952_354.09515	354.095	C16 H18 O9	Scopolin	6.62195e+06	1.04064e+07	7.06099e+06	3.58077e+06	6.3588e+06	5.9772e+06
	7.136_462.08032	462.08	C21 H18 O12	Scutellarin	1.08443e+07	9.90183e+06	1.01228e+07	29190.4	9.84789e+06	1.01826e+07
	4.335_508.15652	508.157	C24 H28 O12	Scutellarioside ii	6.47461e+06	6.73617e+06	8.30295e+06	3.20846e+06	7.60212e+06	6.78136e+06
	5.575_202.12080	202.121	C10 H18 O4	Sebacic acid	5.14575e+06	4.48457e+06	6.46566e+06	2.55713e+06	5.79075e+06	5.04939e+06
	4.892_438.15044	438.15	C21 H26 O10	Sec-O-Glucosylhamaudol	5.6883e+06	6.44652e+06	6.30332e+06	4.34874e+06	5.70155e+06	5.31651e+06
	10.505_194.13101	194.131	C12 H18 O2	Sedanolide	7.52767e+07	5.043e+07	3.81668e+07	7.52626e+07	4.87344e+07	6.15276e+07
	6.497_192.11537	192.115	C12 H16 O2	Senkyunolide A	1.25112e+06	1.48323e+06	1.19141e+06	2.54823e+06	816373	819015
	5.634_206.09455	206.095	C12 H16 O4	Senkyunolide h	4.18981e+06	3.67827e+06	4.05511e+06	5.66996e+06	2.93035e+06	3.45533e+06
	14.32_490.20792	490.208	C22 H30 N6 O5 S	Sildenafil n-oxide	1.06451e+07	1.533e+07	2.38383e+07	6.01584e+06	1.48327e+07	1.38635e+07
	6.665_224.06870	224.069	C11 H12 O5	Sinapinic acid	1.04096e+07	1.13429e+07	1.07597e+07	8.55439e+06	1.05927e+07	1.09005e+07
	8.739_372.12096	372.121	C20 H20 O7	Sinensetin	1.41852e+07	1.54628e+07	1.40412e+07	6.28916e+06	1.14343e+07	1.21844e+07
	3.833_131.07371	131.074	C9 H9 N	Skatole	1.22669e+07	1.31609e+07	1.63134e+07	9.09124e+06	1.09941e+07	9.85535e+06
	8.489_324.08449	324.084	C15 H16 O8	Skimmin	1.20664e+06	1.44556e+06	1.24388e+06	1.10593e+06	1.23083e+06	1.13854e+06
	20.922_620.26287	620.263	C35 H42 Cl2 N4 O2	Ssr146977	9.98196e+06	1.20242e+07	1.25006e+07	1.85671e+07	1.88062e+07	1.25551e+07
	5.148_408.16107	408.161	C25 H20 N4 O2	Ssr161421	4.30114e+07	1.12138e+07	3.80034e+07	2.65107e+07	3.19624e+07	3.75637e+07
	0.801_161.10514	161.105	C7 H13 N O2	Stachydrine	8.44304e+07	6.95528e+07	1.01079e+08	3.98052e+07	8.64631e+07	8.54201e+07
	16.008_301.29803	301.298	C18 H36 O2	Stearic acid	6.10224e+07	5.34615e+07	3.90252e+07	1.87309e+07	4.21803e+07	5.06472e+07
	8.348_345.25157	345.252	C20 H31 N O3	Stearidonoyl glycine	898979	557390	356074	4.47666e+06	399297	789918
	4.905_402.15034	402.15	C21 H26 N2 O2 S2	Sulforidazine	5.96569e+06	5.86775e+06	7.11657e+06	8.37629e+06	6.67772e+06	6.83785e+06
	3.427_198.05310	198.053	C9 H10 O5	Syringic acid	6.88792e+06	7.76537e+06	5.19976e+06	9.71595e+06	6.78414e+06	6.53801e+06
	6.809_372.12089	372.121	C20 H20 O7	Tangeretin	2.40765e+06	1.85917e+06	2.09006e+06	5.48483e+06	2.04814e+06	1.84156e+06
	14.719_516.33065	516.331	C26 H45 N O6 S	Taurodeoxycholic acid	4.53848e+06	4.33575e+06	4.6519e+06	1.79326e+07	1.37487e+07	8.54962e+06
	0.817_304.05817	304.058	C15 H12 O7	Taxifolin	6.51849e+07	5.8442e+07	9.93929e+07	2.22983e+07	8.2347e+07	7.17602e+07
	6.551_307.14193	307.142	C16 H22 Cl N3 O	Tebuconazole	6.87909e+06	6.14932e+06	5.38835e+06	9.10754e+06	6.22422e+06	5.90531e+06
	4.467_230.16321	230.163	C11 H22 N2 O3	Tert-butyl n-[1-(aminocarbonyl)-3-methylbutyl]carbamate	9.97966e+06	1.04346e+07	8.00978e+06	3.76517e+06	5.85629e+07	4.59467e+07
	12.499_412.29791	412.298	C27 H40 O3	Testosterone cypionate	1.33752e+06	5.69711e+07	3.09515e+06	6.10875e+06	3.56867e+06	5.72672e+06
	11.111_442.34521	442.345	C29 H46 O3	Testosterone decanoate	50601	5.47857e+06	141826	252245	362404	398025
	16.72_456.36074	456.361	C30 H48 O3	Testosterone undecanoate	2.54315e+06	3.03755e+06	2.35423e+06	1.21832e+06	2.17553e+06	2.38439e+06
	4.11_426.15023	426.15	C22 H24 N2 O8	Tetracycline	4.26352e+06	4.12176e+06	3.79134e+06	4.60152e+06	1.59154e+06	1.82146e+06
	15.431_364.22501	364.225	C21 H32 O5	Tetrahydrocortisone	2.23058e+06	2.18191e+06	1.80848e+06	754364	1.31252e+06	1.48393e+06
	16.278_248.17773	248.178	C16 H26 O3	Tetranor-12r-hete	7.89188e+06	7.82373e+06	9.68322e+06	4.861e+06	9.00242e+06	8.2699e+06
	5.275_310.13921	310.139	C16 H24 O7	Tetranor-pgdm	4.60809e+06	4.15526e+06	3.57138e+06	3.1932e+06	4.22733e+06	4.07361e+06
	3.858_375.13188	375.132	C20 H25 N O2 S2	Tiagabine	7.80282e+07	7.39477e+07	8.04942e+07	9.51029e+07	7.00256e+07	5.76137e+07
	8.614_493.32577	493.326	C28 H47 N O4 S	Tiamulin	4.34673e+06	3.62637e+06	3.317e+06	3.58689e+06	3.76823e+06	4.38696e+06
	8.771_594.13781	594.138	C30 H26 O13	Tiliroside	380751	5.48902e+07	148287	26800.7	454443	444503
	13.153_324.22762	324.228	C19 H32 O4	Tofa	6.64172e+06	6.02891e+06	5.72648e+06	1.68394e+07	5.80509e+06	6.59614e+06
	6.506_278.16245	278.162	C15 H22 N2 O3	Tolycaine	9.3859e+06	9.47055e+06	8.86453e+06	3.16453e+06	4.17038e+07	4.84163e+07
	7.116_596.22411	596.224	C30 H38 O11	Toosendanin	4.57795e+06	4.67504e+06	5.53631e+06	6.05199e+06	5.02718e+06	4.93383e+06
	6.692_567.23205	567.232	C27 H34 O12	Tracheloside	2.48418e+06	2.51652e+06	9.48559e+06	2.8928e+06	2.5076e+06	2.5454e+06
	6.982_148.08905	148.089	C10 H12 O	Trans-anethole	6.00474e+06	5.47187e+06	5.9204e+06	9.54677e+06	2.30707e+06	2.71058e+06
	4.88_132.05771	132.058	C9 H8 O	Trans-cinnamaldehyde	8.62221e+06	8.65041e+06	9.05387e+06	4.85632e+06	8.1859e+06	8.65072e+06
	6.173_210.12586	210.126	C12 H18 O3	trans-Jasmonic Acid	4.34542e+06	3.95485e+06	2.64452e+06	4.79436e+06	1.30886e+06	1.98204e+06
	2.865_219.11220	219.112	C10 H13 N5 O	Trans-zeatin	6.5252e+07	1.00384e+08	3.70942e+07	811285	5.04037e+06	2.96707e+07
	0.805_276.02471	276.025	C13 H9 Cl3 N2 O	Triclocarban	4.83095e+07	2.60223e+07	5.03164e+07	5.33638e+07	5.65695e+07	5.24201e+07
	6.045_173.06906	173.069	C6 H12 N3 O P	Triethylenephosphoramide	1.54591e+07	1.4498e+07	1.57096e+07	4.0316e+06	1.48549e+07	1.63191e+07
	4.778_463.14846	463.148	C22 H22 O10	Trifolirhizin	4.24394e+06	3.61646e+06	2.57647e+06	1.44809e+06	1.74478e+06	2.94147e+06
	0.771_137.04756	137.048	C7 H7 N O2	Trigonelline	2.25289e+09	2.35908e+09	3.27375e+09	9.68902e+08	2.72008e+09	2.42095e+09
	28.112_137.04790	137.048	C7 H7 N O2	Trigonelline HCl	5.89602e+06	1.16348e+06	636593	370430	2.80435e+06	1.67244e+06
	19.059_301.23796	301.238	C20 H31 N O	Trihexyphenidyl	4.08074e+06	7.32095e+06	8.23655e+06	1.57402e+06	9.93973e+06	6.29375e+06
	6.819_360.15729	360.157	C20 H24 O6	Triptolide	3.25157e+07	3.39444e+07	3.15926e+07	2.34575e+07	3.33896e+07	3.39647e+07
	8.683_358.14169	358.142	C20 H22 O6	Triptonide	2.31669e+07	2.24727e+07	2.0805e+07	1.64737e+07	1.97523e+07	2.03465e+07
	1.354_252.11109	252.111	C12 H16 N2 O4	Tyrosylalanine	844356	874453	738070	166290	7.35099e+06	5.44328e+06
	18.133_332.23266	332.233	C21 H34 O4	U-44069	2.20479e+07	2.02569e+07	2.19502e+07	2.55347e+07	2.43677e+07	2.48502e+07
	6.927_308.17357	308.174	C16 H24 N2 O4	Ubenimex	248326	303186	206242	70484.3	4.65796e+06	3.6175e+06
	4.751_516.25531	516.255	C25 H36 N6 O4 S	Udenafil	3.69666e+06	6.79518e+06	7.49191e+06	2.21517e+06	1.03071e+07	9.40573e+06
	18.798_400.13105	400.131	C25 H21 Cl N2 O	Urb447	5.71526e+06	5.64959e+06	7.61975e+06	2.77991e+06	6.61434e+06	5.95888e+06
	19.425_456.36071	456.361	C30 H48 O3	Ursolic acid	4.62765e+08	4.70549e+08	5.84842e+08	4.36294e+08	6.18936e+08	5.09161e+08
	7.355_162.10466	162.105	C11 H14 O	Valerophenone	2.33627e+06	1.7581e+06	1.92534e+06	9.58403e+06	1.03944e+06	1.61307e+06
	8.12_435.22593	435.226	C24 H29 N5 O3	Valsartan	3.82786e+06	3.61526e+06	3.15654e+06	6.82298e+06	3.46035e+06	3.45218e+06
	1.875_214.13196	214.132	C10 H18 N2 O3	Valylproline	1.3296e+07	1.07368e+07	1.20929e+07	2.97187e+06	3.73545e+07	2.46594e+07
	8.665_152.04752	152.048	C8 H8 O3	Vanillin	1.806e+06	1.81276e+06	1.59078e+06	1.94413e+06	1.72171e+06	1.71913e+06
	7.234_564.14820	564.148	C26 H28 O14	Vicenin III	2.1683e+06	2.09586e+06	1.96564e+06	2.37954e+06	1.727e+06	1.96463e+06
	7.726_456.23409	456.234	C25 H32 N2 O6	Vindoline	749453	807231	737867	1.45026e+06	909904	696247
	15.145_456.22584	456.226	C25 H32 N2 O6	Vindoline	5.1224e+06	4.96795e+06	5.75575e+06	1.52414e+06	8.40446e+06	7.58558e+06
	6.072_230.05806	230.058	C13 H10 O4	Visnagin	8.23514e+06	7.92447e+06	8.27051e+06	332151	7.80368e+06	7.75234e+06
	10.519_376.09470	376.095	C19 H21 Cl N2 O2 S	W-15	4.15696e+06	4.1458e+06	3.98184e+06	2.66354e+07	5.82621e+06	6.28968e+06
	17.356_454.34513	454.345	C30 H46 O3	Wilforlide A	2.09937e+07	7.30623e+07	3.53481e+07	4.03367e+07	3.89396e+07	3.9284e+07
	16.392_448.28308	448.283	C28 H38 O6	Withanolide a	1.25284e+06	2.88756e+06	1.90582e+06	4.35075e+06	1.4417e+07	8.01958e+06
	5.838_196.07383	196.074	C10 H12 O4	Xanthoxyline	1.02523e+07	9.97177e+06	1.07155e+07	1.93202e+06	9.90158e+06	9.82454e+06
	4.427_280.10592	280.106	C13 H16 N2 O5	Α-aspartylphenylalanine	5.94295e+06	2.54346e+06	4.97322e+06	3.74671e+06	5.43104e+06	3.9578e+06
	15.743_278.22417	278.224	C18 H30 O2	Α-eleostearic acid	3.59779e+08	1.9462e+08	1.61982e+08	5.80393e+08	2.01256e+08	2.85951e+08
	0.771_342.11534	342.115	C12 H22 O11	Α-lactose	3.93068e+07	3.24296e+07	6.01983e+07	6.39147e+07	2.0088e+07	3.34277e+07
	19.632_278.22419	278.224	C18 H30 O2	Α-linolenic acid	3.95847e+06	4.29199e+06	3.00682e+06	9.11072e+06	5.68486e+06	4.80843e+06
	16.564_321.26671	321.267	C20 H35 N O2	Α-linolenoyl ethanolamide	3.43486e+07	3.32654e+07	3.19357e+07	2.33492e+07	4.71676e+07	4.77951e+07
	4.915_208.11019	208.11	C12 H16 O3	Β-asarone	1.5809e+07	1.5414e+07	1.44811e+07	7.41377e+06	9.5954e+06	1.163e+07
	5.144_208.11019	208.11	C12 H16 O3	β-Asarone	6.61019e+07	6.04561e+07	5.67846e+07	5.54029e+07	4.93074e+07	5.8908e+07
	11.619_366.24046	366.24	C21 H34 O5	Β-cortolone	5.25919e+06	5.76613e+06	5.57932e+06	7.68285e+06	7.79449e+06	5.78263e+06
	16.255_312.26644	312.266	C20 H34 O2	Γ-linolenic acid ethyl ester	1.4735e+08	1.4675e+08	1.79752e+08	2.10215e+07	7.41145e+07	8.83018e+07
	14.31_350.20693	350.207	C20 H32 O6	Δ17-6-keto prostaglandin f1α	2.31201e+06	2.76155e+06	1.22157e+06	2.10339e+06	1.03878e+06	1.785e+06
	0.786_276.09514	276.095	C10 H16 N2 O7	Υ-l-glutamyl-l-glutamic acid	1.58486e+07	1.18418e+07	1.91159e+07	2.9525e+07	1.52758e+07	1.88358e+07
Negative	7.97_198.08903	198.089	C10 H14 O4	(-)-camphanic acid	3.24144e+06	2.3734e+06	2.41095e+06	3.03801e+06	1.19256e+06	1.20611e+06
	5.728_172.07352	172.074	C8 H12 O4	(-)-corey lactone	2.64828e+06	1.82958e+06	1.49307e+06	1.81849e+06	1.57516e+06	1.79574e+06
	6.51_442.08937	442.089	C22 H18 O10	(-)-Epicatechin gallate	8.18493e+06	9.03814e+06	9.32589e+06	5.03646e+06	1.31498e+07	1.07855e+07
	5.712_458.08428	458.084	C22 H18 O11	(-)-Epigallocatechin gallate	1.50484e+07	1.53806e+07	1.80336e+07	4.71266e+06	1.80025e+07	1.65359e+07
	4.214_306.07361	306.074	C15 H14 O7	(-)-Gallocatechin	6.6383e+06	9.50062e+06	1.42554e+07	1.29748e+06	9.29865e+06	4.60972e+06
	4.535_290.07875	290.079	C15 H14 O6	(+)-Catechin hydrate	1.94275e+09	2.18258e+09	2.2949e+09	9.89926e+08	2.26493e+09	2.43131e+09
	8.221_358.14130	358.141	C20 H22 O6	(+)-Pinoresinol	4.80202e+06	6.44301e+06	5.90172e+06	6.77636e+06	6.15388e+06	5.01771e+06
	13.268_314.24544	314.245	C18 H34 O4	(+/-)12(13)-dihome	690733	327533	98097.4	1.12694e+06	492949	1.00499e+06
	15.737_296.23480	296.235	C18 H32 O3	(+/-)9(10)-epome	5.61339e+08	3.45085e+08	2.00956e+08	1.13806e+09	2.45756e+08	5.51833e+08
	13.838_314.24529	314.245	C18 H34 O4	(+/-)9,10-dihydroxy-12z-octadecenoic acid	2.73329e+06	2.57028e+06	1.06062e+06	4.04064e+06	1.84768e+06	2.69778e+06
	13.777_312.22957	312.23	C18 H32 O4	(+/-)9-hpode	9.76059e+07	8.46696e+07	5.32784e+07	2.1498e+08	6.98135e+07	9.29401e+07
	8.595_264.13563	264.136	C15 H20 O4	(±)-abscisic acid	2.35248e+07	2.59319e+07	2.8641e+07	2.7306e+07	1.37063e+07	1.20607e+07
	6.248_396.17790	396.178	C19 H26 O6	(10z)-6,10-bis(hydroxymethyl)-3-methylene-2-oxo-2,3,3a,4,5,6,7,8,9,11a-decahydrocyclodeca[b]furan-4-yl methacrylate	2.44934e+06	2.49788e+06	2.52668e+06	1.8977e+06	2.95654e+06	2.97343e+06
	8.815_544.28702	544.287	C27 H38 N4 O5	(14e,16s,17s)-8-(4-morpholinyl)-17-[2-(4-morpholinyl)-2-oxoethyl]-12-oxa-1,4-diazatricyclo[14.3.1.06,11]icosa-6,8,10,14-tetraen-2-one	3.64578e+06	3.99523e+06	3.74879e+06	2.10735e+06	3.43697e+06	3.44536e+06
	10.498_330.24034	330.24	C18 H34 O5	(15z)-9,12,13-trihydroxy-15-octadecenoic acid	9.93255e+08	8.48396e+08	6.46058e+08	1.15422e+09	7.32961e+08	8.8392e+08
	4.552_576.24116	576.241	C25 H38 O12	(1r,2r,3r,3as,5as,6r,7r,10r,10ar,10cr)-1,2,6,7-tetrahydroxy-3,7,10a,10c-tetramethyl-4-oxo-2,3,3a,4,5a,6,6a,7,10,10a,10b,10c-dodecahydro-1h-phenanthro[10,1-bc]furan-10-yl β-d-glucopyranoside	254360	240167	239860	5.94167e+06	289681	258027
	12.756_706.39461	706.395	C38 H60 O13	(1s,2s,8ξ,9β,16α,17ξ)-1-(β-d-glucopyranosyloxy)-2,16,20-trihydroxy-9,10,14-trimethyl-11,22-dioxo-4,9-cyclo-9,10-secocholest-5-en-25-yl acetate	2.16086e+06	2.32429e+06	2.25975e+06	2.10475e+06	2.07392e+06	1.8689e+06
	1.279_440.13127	440.131	C20 H24 O11	(1s,7s,8s,9r,10s,11s,13s,16s)-6,9,12,17-tetrahydroxy-16-methyl-8-(2-methyl-2-propanyl)-2,4,14,19-tetraoxahexacyclo[8.7.2.01,11 03,7 07,11 013,17]nonadecane-5,15,18-trione	7.90463e+06	7.66412e+06	9.66857e+06	3.72488e+06	8.53203e+06	9.72784e+06
	2.401_450.11572	450.116	C21 H22 O11	(1ξ)-1,5-anhydro-1-[(2r,3r)-3,5,7-trihydroxy-2-(4-hydroxyphenyl)-4-oxo-3,4-dihydro-2h-chromen-6-yl]-d-glucitol	9.57502e+06	7.74125e+06	8.43183e+06	8.27007e+06	8.92826e+06	5.01906e+06
	11.156_692.36356	692.364	C32 H54 O13	(2e)-5-{(1r,4as,5s,6r,8as)-5-[(β-d-glucopyranosyloxy)methyl]-6-hydroxy-5,8a-dimethyl-2-methylenedecahydro-1-naphthalenyl}-3-methyl-2-penten-1-yl β-d-glucopyranoside	705086	710400	770638	5.41894e+06	1.4031e+06	1.0376e+06
	10.041_580.19429	580.194	C27 H33 F N4 O5 S	(2r)-n-[(2s)-1-amino-3-cyclohexyl-1-oxo-2-propanyl]-4-(3-fluorobenzoyl)-1-(phenylsulfonyl)-2-piperazinecarboxamide	4.28278e+06	4.6157e+06	4.4515e+06	6.88994e+06	3.95878e+06	4.45276e+06
	7.791_362.17258	362.173	C20 H26 O6	(2'r,3r,4'r,4a'r,5s,8a's)-5-(3-furyl)-4'-hydroxy-4a',5'-bis(hydroxymethyl)-2'-methyl-3',4,4',4a',5,7',8',8a'-octahydro-2'h-spiro[furan-3,1'-naphthalen]-2-one	1.70818e+07	2.83358e+07	2.39185e+07	1.94436e+07	3.83558e+07	2.2016e+07
	12.068_464.25319	464.253	C22 H40 N2 O4 S	(2s)-n-cyclohexyl-2-{(1s,2s,4as,7s,8s,8as)-1-hydroxy-4a,8-dimethyl-7-[(methylsulfonyl)amino]decahydro-2-naphthalenyl}propanamide	4.40307e+06	4.99552e+06	5.85059e+06	7.02136e+06	8.11505e+06	5.92454e+06
	2.711_312.08745	312.087	C14 H16 O8	(2s,3s)-2-{[(2e)-3-(3,4-dihydroxyphenyl)-2-propenoyl]oxy}-3,4-dihydroxy-2-methylbutanoic acid	1.69579e+06	2.14676e+06	3.24252e+06	2.42664e+06	2.18527e+06	3.73316e+06
	12.492_488.34918	488.349	C30 H48 O5	(2α,3β,19α)-2,3,19-trihydroxyolean-12-en-28-oic acid	2.90772e+07	7.90119e+08	6.47884e+07	1.17419e+08	6.2144e+07	1.02847e+08
	4.216_473.24778	473.248	C23 H30 F N5 O2	(3r,4r,6r)-n-(4-fluorobenzyl)-6-{[4-(1-hydroxycyclopentyl)-1h-1,2,3-triazol-1-yl]methyl}quinuclidine-3-carboxamide	2.26605e+06	2.85555e+06	3.21423e+06	499793	5.58211e+06	4.87597e+06
	14.434_432.22717	432.227	C24 H28 N6 O2	(3r,4s,6r)-n-(2-methoxybenzyl)-6-{[4-(2-pyridinyl)-1h-1,2,3-triazol-1-yl]methyl}quinuclidine-3-carboxamide	3.94003e+07	4.58654e+07	4.54821e+07	8.49329e+06	3.99721e+07	4.31113e+07
	4.926_406.18359	406.184	C19 H26 N6 O2	(3r,6r)-6-{[4-(2-hydroxyethyl)-1h-1,2,3-triazol-1-yl]methyl}-n-(3-pyridinylmethyl)quinuclidine-3-carboxamide	3.71384e+06	4.09008e+06	3.95527e+06	4.97374e+06	1.69566e+06	2.81188e+06
	14.277_531.21976	531.22	C30 H30 F N5 O	(3r,6r)-6-{[4-(4-biphenylyl)-1h-1,2,3-triazol-1-yl]methyl}-n-(4-fluorobenzyl)quinuclidine-3-carboxamide	6.78673e+06	7.45312e+06	1.01092e+07	5.93301e+06	9.9789e+06	9.55767e+06
	5.91_463.24238	463.242	C29 H29 N5 O	(3r,6r)-6-{[4-(4-biphenylyl)-1h-1,2,3-triazol-1-yl]methyl}-n-phenylquinuclidine-3-carboxamide	2.60045e+06	2.78788e+06	2.9096e+06	1.01459e+06	3.64535e+06	2.87866e+06
	11.849_486.33372	486.334	C30 H46 O5	(3β,5ξ,9ξ)-3,23-dihydroxy-1-oxoolean-12-en-28-oic acid	4.91019e+06	3.48954e+08	2.29191e+07	2.89937e+07	3.33458e+07	4.00751e+07
	15.736_364.22220	364.222	C20 H30 O3	(5ξ,9ξ)-17-hydroxykaur-15-en-19-oic acid	2.51071e+07	2.14322e+07	1.29456e+07	3.63572e+07	6.7673e+06	2.34206e+07
	8.799_448.23012	448.23	C21 H36 O10	(6,6-dimethylbicyclo[3.1.1]hept-2-yl)methyl 6-o-[(2r,3r,4r)-3,4-dihydroxy-4-(hydroxymethyl)tetrahydro-2-furanyl]-β-d-glucopyranoside	1.18762e+08	1.24379e+08	1.14632e+08	1.4437e+08	9.86634e+07	9.5922e+07
	8.596_152.08365	152.084	C9 H12 O2	(r)-1-phenyl-1,3-propanediol	1.09275e+06	1.26667e+06	1.39992e+06	1.28246e+06	723201	585700
	5.142_388.17298	388.173	C18 H28 O9	{(1r,2r)-2-[(2z)-5-(hexopyranosyloxy)-2-penten-1-yl]-3-oxocyclopentyl}acetic acid	1.28639e+08	1.23462e+08	1.30341e+08	1.08432e+08	1.00958e+08	1.22827e+08
	4.437_580.23628	580.236	C30 H29 F3 N4 O2	{(2r,4s,5r)-5-[1-methyl-3-(2-naphthyl)-1h-pyrazol-5-yl]-1-azabicyclo[2.2.2]oct-2-yl}methyl [3-(trifluoromethyl)phenyl]carbamate	1.07764e+06	1.08968e+06	686861	1.45538e+07	915993	755285
	4.74_446.17836	446.178	C25 H28 N4 O3 S	{(2r,4s,5r)-5-[1-methyl-3-(2-thienyl)-1h-pyrazol-5-yl]-1-azabicyclo[2.2.2]oct-2-yl}methyl (4-acetylphenyl)carbamate	1.29229e+06	1.22956e+06	1.30114e+06	1.41182e+06	1.11225e+06	1.2144e+06
	9.482_492.29255	492.293	C26 H40 N4 O3	1-({(1s,4s,6s)-6-isopropyl-3-methyl-4-[2-(4-methyl-1-piperazinyl)-2-oxoethyl]-2-cyclohexen-1-yl}methyl)-3-(3-methoxyphenyl)urea	5.29035e+06	3.20588e+06	1.85404e+06	5.03564e+06	2.20504e+06	2.9257e+06
	6.835_511.19796	511.198	C26 H34 Br N5 O	1-({(2r,4s,5r)-5-[6-(2-bromophenyl)-2-methyl-4-pyrimidinyl]-1-azabicyclo[2.2.2]oct-2-yl}methyl)-3-cyclohexylurea	3.42528e+06	3.29836e+06	3.71948e+06	8.02673e+06	3.18398e+06	3.11582e+06
	8.882_417.27221	417.272	C21 H33 N5 O	1-({(2r,4s,5s)-5-[(4-methyl-1-piperazinyl)methyl]-1-azabicyclo[2.2.2]oct-2-yl}methyl)-3-phenylurea	1.56386e+06	1.21882e+06	713640	3.77187e+06	831639	1.48989e+06
	12.576_458.28725	458.287	C27 H34 N6 O	1-(3-cyanophenyl)-3-({(2r,4s,5s)-5-[(4-phenyl-1-piperazinyl)methyl]-1-azabicyclo[2.2.2]oct-2-yl}methyl)urea	1.16654e+06	625722	234299	2.37147e+06	720248	1.33356e+06
	14.224_482.26356	482.264	C26 H34 N6 O	1-(3-cyanophenyl)-3-{[(2r,4s,5r)-5-(3-cyclohexyl-1-methyl-1h-pyrazol-5-yl)-1-azabicyclo[2.2.2]oct-2-yl]methyl}urea	587563	526439	199018	1.10819e+07	1.48658e+06	1.29218e+06
	4.152_190.08405	190.084	C9 H10 N4 O	1-(4,7-dimethylpyrazolo[5,1-c][1,2,4]triazin-3-yl)ethan-1-one	4.23382e+07	4.26211e+07	4.51558e+07	3.4145e+07	5.10891e+07	4.54974e+07
	7.048_360.15701	360.157	C20 H24 O6	1,2,3,4-tetrahydro-7-hydroxy-1-(4-hydroxy-3-methoxyphenyl)-6-methoxy-2,3-naphthalenedimethanol	2.93255e+06	3.56167e+06	3.75722e+06	873263	3.37147e+06	3.62402e+06
	0.778_210.07364	210.074	C8 H10 N4 O3	1,3,7-trimethyluric acid	4.3176e+08	3.95961e+08	4.17178e+08	1.87477e+08	3.81942e+08	4.94927e+08
	5.877_444.12616	444.126	C20 H20 N6 O4	1,4:3,6-dianhydro-2,5-dideoxy-2-(5-phenoxy-1h-tetrazol-1-yl)-5-[(phenylcarbamoyl)amino]-l-iditol	2.40353e+06	2.26639e+06	2.37853e+06	2.71108e+06	2.13684e+06	2.20472e+06
	4.559_484.08449	484.084	C20 H20 O14	1,6-bis-o-(3,4,5-trihydroxybenzoyl)hexopyranose	5.15294e+06	3.83902e+06	3.8618e+06	2.53344e+06	4.23592e+06	3.87096e+06
	14.379_479.30025	479.3	C27 H37 N5 O3	1-[1-({(3r,4s)-3-[(5-butyl-1,2-oxazol-3-yl)methyl]-4-piperidinyl}acetyl)-4-piperidinyl]-1,3-dihydro-2h-benzimidazol-2-one	1.47223e+06	2.24724e+06	1.71258e+06	1.5385e+06	1.09882e+07	3.4316e+06
	5.571_476.15219	476.152	C20 H23 F3 N4 O4	1-{4-[(2s,4r)-4-hydroxy-2-{3-[4-(trifluoromethoxy)phenyl]-1,2,4-oxadiazol-5-yl}-1-pyrrolidinyl]-1-piperidinyl}ethanone	2.01091e+06	1.89113e+06	2.05064e+06	1.72369e+06	2.29517e+06	2.14389e+06
	14.829_336.22965	336.23	C20 H32 O4	12-epileukotriene b4	2.08991e+06	2.49527e+06	1.99852e+06	1.02013e+06	1.72606e+06	1.77488e+06
	14.366_292.20338	292.203	C18 H28 O3	12-oxo phytodienoic acid	7.16173e+06	1.0054e+07	7.45622e+06	5.41413e+06	8.17336e+06	1.0862e+07
	14.758_294.21906	294.219	C18 H30 O3	13(s)-hotre	1.79793e+08	2.05743e+08	1.02994e+08	2.36026e+08	1.21553e+08	1.68202e+08
	15.404_292.20341	292.203	C18 H30 O4	13(s)-hpotre	2.31767e+07	4.97937e+07	2.38276e+07	2.43611e+07	2.75449e+07	3.17479e+07
	12.025_358.27156	358.272	C20 H38 O5	13,14-dihydro prostaglandin f1α	1.43876e+06	1.32669e+06	780858	3.97478e+06	900937	1.16687e+06
	8.344_300.19325	300.193	C16 H28 O5	13,14-dihydro-15-keto-tetranor prostaglandin f1α	1.47221e+07	1.34409e+07	9.0354e+06	5.38633e+07	9.63882e+06	1.76677e+07
	10.198_300.19322	300.193	C16 H28 O5	13,14-dihydro-15-keto-tetranor prostaglandin f1β	476955	360797	145073	1.94763e+06	282577	606916
	11.508_354.24026	354.24	C20 H36 O6	13,14-dihydro-19(r)-hydroxy prostaglandin e1	1.5653e+06	1.97722e+06	1.97501e+06	1.93415e+06	1.67394e+06	1.51545e+06
	7.359_338.18383	338.184	C20 H28 O3	15-deoxy-δ12,14 -prostaglandin j2	4.40502e+06	3.91102e+06	3.79308e+06	1.07397e+07	2.24181e+06	2.96035e+06
	15.887_272.23462	272.235	C16 H32 O3	16-hydroxyhexadecanoic acid	3.23161e+06	3.30984e+06	3.14936e+06	9.4705e+06	3.69952e+06	4.14472e+06
	18.942_272.23462	272.235	C16 H32 O3	16-hydroxyhexadecanoic acid	6.18453e+07	8.16306e+07	8.22928e+07	6.81549e+07	7.91613e+07	7.09158e+07
	15.481_470.33878	470.339	C30 H46 O4	18-β-glycyrrhetinic acid	1.11745e+07	1.01463e+07	1.08847e+07	25064.9	1.08405e+07	1.28132e+07
	7.424_368.21957	368.22	C20 H32 O6	19(r)-hydroxy-prostaglandin e2	2.06292e+07	2.33206e+07	2.05021e+07	2.20219e+06	3.21796e+07	3.33297e+07
	16.275_382.27156	382.272	C22 H38 O5	1a,1b-dihomo prostaglandin f2α	154898	189151	170873	2.22433e+06	136711	165807
	10.496_415.21779	415.218	C22 H29 N5 O	1-ethyl-3-{[(2r,4s,5r)-5-(2-methyl-6-phenyl-4-pyrimidinyl)-1-azabicyclo[2.2.2]oct-2-yl]methyl}urea	5.98716e+06	5.63077e+06	4.35578e+06	5.68425e+06	5.76406e+06	7.23366e+06
	7.429_163.03950	163.04	C7 H5 N3 O2	1h-benzotriazole-5-carboxylic acid	3.72222e+06	5.23152e+06	5.30831e+06	3.44566e+06	6.66758e+06	5.32003e+06
	9.105_666.39820	666.398	C36 H60 O12	1-o-(1,3,23,24,25-pentahydroxy-28-oxo-9,19-cyclolanostan-28-yl)hexopyranose	1.55353e+06	1.65363e+06	1.73764e+06	2.11967e+06	1.39856e+06	1.47951e+06
	8.281_712.40522	712.405	C36 H58 O11	1-o-[(2α,3β,5ξ,9ξ,18ξ,19α)-2,3,19,23-tetrahydroxy-28-oxoolean-12-en-28-yl]-β-d-glucopyranose	4.70211e+07	4.85987e+07	4.99674e+07	3.99716e+07	4.69676e+07	4.86225e+07
	6.099_596.13733	596.137	C26 H28 O16	2-(3,4-dihydroxyphenyl)-5,7-dihydroxy-4-oxo-4h-chromen-3-yl 6-o-β-d-xylopyranosyl-β-d-glucopyranoside	3.74877e+06	3.94881e+06	4.27309e+06	2.23207e+06	3.85283e+06	3.48354e+06
	7.606_462.24580	462.246	C22 H38 O10	2-(4-methyl-3-cyclohexen-1-yl)-2-propanyl 6-o-(6-deoxy-α-l-mannopyranosyl)-β-d-glucopyranoside	1.45695e+06	731338	807939	2.04908e+06	829665	836059
	1.295_224.03516	224.035	C8 H8 N4 O2 S	2-(methylsulfonyl)-3-(pyrazin-2-ylamino)acrylonitrile	9.69845e+06	8.96991e+06	9.32176e+06	6.13529e+06	8.09356e+06	7.53756e+06
	7.379_364.07908	364.079	C16 H17 Cl N4 O2 S	2-(tert-butyl)-6-[(4-chlorophenyl)sulfonyl]pyrazolo[1,5-a]pyrimidin-7-amine	33944	23056.1	36970.3	4.11316e+06	31349.7	30099.1
	1.106_134.05783	134.058	C5 H10 O4	2,2-bis(hydroxymethyl)propionic acid	5.89048e+07	5.70575e+07	4.84424e+07	1.03431e+08	4.1505e+07	5.01652e+07
	9.514_326.20912	326.209	C18 H30 O5	2,3-dinor prostaglandin e1	207097	192383	117418	1.49206e+06	140665	244085
	9.982_326.20912	326.209	C18 H30 O5	2,3-dinor-11β-prostaglandin f2α	1.56185e+06	1.52765e+06	768861	1.25705e+07	666924	1.39953e+06
	7.605_288.06294	288.063	C15 H12 O6	2,4,6-trihydroxy-2-(4-hydroxybenzyl)-1-benzofuran-3(2h)-one	6.61661e+07	6.99052e+07	7.41074e+07	2.45483e+07	7.61088e+07	7.28674e+07
	6.867_168.04219	168.042	C8 H8 O4	2,4,6-trihydroxyacetophenone	1.31315e+08	1.59994e+08	1.78363e+08	6.74319e+07	2.35701e+08	1.97368e+08
	7.775_374.13627	374.136	C20 H24 O8	2,4-dihydroxy-2,3-bis[(4-hydroxy-3-methoxyphenyl)methyl]butanoic acid	9.85264e+06	1.04762e+07	1.15018e+07	1.03606e+07	9.78471e+06	9.83274e+06
	4.53_138.03165	138.032	C7 H6 O3	2,5-dihydroxybenzaldehyde	7.05788e+06	7.58945e+06	3.60815e+06	3.26304e+06	1.02902e+07	1.14516e+07
	1.365_266.09960	266.1	C11 H14 N4 O4	2,6-bis[(2-hydroxyethyl)amino]-3-nitrobenzonitrile	1.46426e+07	1.34778e+07	1.48848e+07	1.3168e+07	1.22947e+07	1.32241e+07
	7.285_466.27711	466.277	C27 H35 F N4 O2	2-[(1s,4s,5s)-4-({[(3-fluorophenyl)carbamoyl]amino}methyl)-5-isopropyl-2-methyl-2-cyclohexen-1-yl]-n-methyl-n-(3-pyridinylmethyl)acetamide	595126	368932	546348	2.45085e+06	530109	607842
	16.384_448.28175	448.282	C27 H36 N4 O2	2-[(1s,4s,5s)-4-{[(benzylcarbamoyl)amino]methyl}-5-isopropyl-2-methyl-2-cyclohexen-1-yl]-n-(3-pyridinylmethyl)acetamide	212447	211322	240865	2.35835e+06	112089	170520
	18.814_448.28180	448.282	C27 H36 N4 O2	2-[(1s,4s,5s)-4-{[(benzylcarbamoyl)amino]methyl}-5-isopropyl-2-methyl-2-cyclohexen-1-yl]-n-(3-pyridinylmethyl)acetamide	4.59277e+06	4.62319e+06	5.18081e+06	4.68964e+06	4.14962e+06	3.79576e+06
	7.812_468.22017	468.22	C22 H34 N2 O4 S	2-[(1s,4s,5s)-5-isopropyl-2-methyl-4-{[(methylsulfonyl)amino]methyl}-2-cyclohexen-1-yl]-n-(4-methoxybenzyl)acetamide	1.67234e+06	1.67821e+06	1.98196e+06	1.40942e+06	1.29294e+06	1.68636e+06
	16.346_450.27396	450.274	C24 H38 N4 O2	2-[(1s,4s,5s)-5-isopropyl-4-{[(isopropylcarbamoyl)amino]methyl}-2-methyl-2-cyclohexen-1-yl]-n-methyl-n-(3-pyridinylmethyl)acetamide	3.03811e+07	2.95595e+07	5.04554e+07	9.11326e+06	1.21145e+08	6.51594e+07
	3.771_244.05785	244.058	C14 H12 O2 S	2-[(2-methylphenyl)thio]benzoic acid	1.35735e+07	1.06835e+07	1.25432e+07	4.70484e+06	9.40824e+06	8.96822e+06
	6.532_354.13450	354.135	C17 H23 Cl N2 O4	2-[(2s,3r,4s,5r)-5-{[(3-chlorobenzyl)amino]methyl}-3,4-dihydroxytetrahydro-2-furanyl]-n-cyclopropylacetamide	1.91898e+06	1.41839e+06	873864	1.84096e+06	1.10978e+06	1.79742e+06
	7.798_477.12637	477.126	C23 H27 N3 O2 S2	2-[(3r,4s)-3-({5-[(phenylsulfanyl)methyl]-1,2-oxazol-3-yl}methyl)-4-piperidinyl]-n-(2-thienylmethyl)acetamide	2.05169e+06	3.0599e+06	2.73206e+06	446761	3.95771e+06	3.26208e+06
	7.406_478.31333	478.313	C24 H40 N4 O3	2-[(3r,4s)-3-{[5-(cyclohexylmethyl)-1,2-oxazol-3-yl]methyl}-4-piperidinyl]-n-[2-(4-morpholinyl)ethyl]acetamide	4.28777e+06	4.66507e+06	4.71868e+06	4.72926e+06	4.87533e+06	4.63123e+06
	6.44_301.19975	301.2	C18 H24 F N3	2-[(3s)-1-(cyclohexylmethyl)-3-pyrrolidinyl]-5-fluoro-1h-benzimidazole	454046	593527	631682	142274	3.02753e+06	2.39958e+06
	5.117_473.15263	473.153	C21 H28 F N3 O4 S	2-{(3r,4s)-1-[(3,5-dimethyl-1,2-oxazol-4-yl)sulfonyl]-3-ethyl-4-piperidinyl}-n-(4-fluorobenzyl)acetamide	1.49901e+06	1.81824e+06	1.54115e+06	5.61189e+06	2.16821e+06	2.27936e+06
	11.471_462.23752	462.238	C24 H34 N4 O3	2-{(3r,4s)-3-[(5-{[benzyl(methyl)amino]methyl}-1,2-oxazol-3-yl)methyl]-4-piperidinyl}-1-(4-morpholinyl)ethanone	5.17346e+06	4.72369e+06	4.11296e+06	6.8724e+06	5.69286e+06	5.38142e+06
	10.356_370.23521	370.235	C20 H34 O6	20-hydroxy prostaglandin f2α	2.74171e+06	3.0844e+06	3.02364e+06	2.07868e+06	2.97316e+06	3.07506e+06
	6.969_332.05624	332.056	C10 H13 N4 O7 P	2'-deoxyinosine 5'-monophosphate	2.48479e+07	2.53767e+07	2.27423e+07	443313	2.31192e+07	2.32199e+07
	2.341_374.17983	374.18	C24 H23 F N2 O	2-fluoro nnei	9.01651e+06	1.3101e+07	1.20264e+07	2.7887e+06	8.96135e+06	8.46324e+06
	0.807_112.01602	112.016	C5 H4 O3	2-furoic acid	7.14666e+07	8.47288e+07	9.3172e+07	6.39825e+07	1.4204e+08	1.10315e+08
	6.249_196.07338	196.073	C10 H12 O4	2-hydroxy-4-(4-hydroxyphenyl)butanoic acid	1.08719e+07	1.13881e+07	1.38189e+07	5.40752e+06	2.12244e+07	1.54593e+07
	4.046_338.15733	338.157	C21 H22 O4	2-hydroxy-4-methoxy-3-(3-methyl-2-buten-1-yl)-6-[(e)-2-phenylvinyl]benzoic acid	7.54283e+06	8.81642e+06	8.79425e+06	8.58939e+06	1.04605e+07	9.1485e+06
	7.3_132.07861	132.079	C6 H12 O3	2-hydroxycaproic acid	1.17469e+07	9.84029e+06	1.00642e+07	4.92983e+07	9.54975e+06	9.78336e+06
	5.801_164.04729	164.047	C9 H8 O3	2-hydroxycinnamic acid	9.57e+06	1.40325e+07	1.47593e+07	1.33481e+06	8.24679e+06	7.20965e+06
	5.836_152.04725	152.047	C8 H8 O3	2-hydroxyphenylacetic acid	1.12317e+06	1.03474e+06	993766	3.50827e+06	885287	1.13485e+06
	5.574_118.06303	118.063	C5 H10 O3	2-hydroxyvaleric acid	2.67437e+06	2.27418e+06	2.29231e+06	6.64344e+06	2.24777e+06	2.21807e+06
	4.282_176.06838	176.068	C7 H12 O5	2-isopropylmalic acid	2.70049e+07	2.52825e+07	2.75215e+07	2.30551e+07	2.45971e+07	2.12473e+07
	1.068_102.03146	102.031	C4 H6 O3	2-Ketobutyric acid	5.18641e+06	3.19286e+06	2.55076e+06	7.05126e+06	2.24417e+06	4.0012e+06
	5.039_136.05245	136.052	C8 H8 O2	2-methylbenzoic acid	2.41514e+06	4.35061e+06	3.08636e+06	190609	3.82493e+06	3.66127e+06
	7.97_154.09933	154.099	C9 H14 O2	2-norbornaneacetic acid	2.7277e+06	2.69707e+06	2.81762e+06	3.31589e+06	1.33242e+06	1.36424e+06
	6.74_616.10759	616.108	C28 H24 O16	2'-O-Galloylhyperin	3.47572e+08	3.25648e+08	3.39464e+08	5.58578e+07	4.12695e+08	3.66546e+08
	1.051_282.09443	282.094	C11 H14 N4 O5	2'-o-methylinosine	4.4311e+06	4.07211e+06	4.53681e+06	3.09223e+06	3.79211e+06	3.60628e+06
	0.809_146.02131	146.021	C5 H6 O5	2-oxoglutaric acid	1.62798e+09	1.29812e+09	1.13884e+09	8.47923e+08	1.51585e+09	1.12582e+09
	5.948_610.15264	610.153	C27 H30 O16	2''-O-β-L-Galactopyranosylorientin	2.17583e+06	1.80365e+06	1.57986e+06	6.82589e+06	1.5915e+06	1.31427e+06
	7.515_428.16781	428.168	C20 H28 O10	2-phenylethyl 3-o-(4-carboxy-3-hydroxy-3-methylbutanoyl)-β-d-glucopyranoside	4.14646e+06	3.96718e+06	4.01905e+06	148948	3.77841e+06	4.23302e+06
	9.271_302.11500	302.115	C17 H18 O5	3-(2,6-dihydroxy-3,4-dimethylbenzyl)-2,4-dihydroxy-6-methylbenzaldehyde	1.82151e+06	2.17733e+06	2.09801e+06	1.52358e+06	1.92525e+06	2.09855e+06
	8.594_272.06794	272.068	C15 H12 O5	3-(2,6-dihydroxyphenyl)-4-hydroxy-6-methyl-2-benzofuran-1(3h)-one	7.73796e+06	7.52751e+06	8.82259e+06	2.92228e+06	7.99784e+06	6.90288e+06
	5.439_367.12637	367.126	C18 H23 Cl2 N3 O	3-(tert-butyl)-1-(2,4-dichlorobenzyl)-n-isopropyl-1h-pyrazole-5-carboxamide	4.32401e+07	4.56393e+07	4.73601e+07	5.07747e+07	3.78709e+07	3.84668e+07
	2.585_381.16309	381.163	C20 H23 N5 O S	3-(tert-butyl)-n-[4-(2,3-dihydroimidazo[2,1-b][1,3]thiazol-6-yl)phenyl]-1-methyl-1h-pyrazole-5-carboxamide	3.11419e+06	4.99853e+06	4.58026e+06	4.42454e+06	3.64043e+06	4.06634e+06
	4.924_206.02133	206.021	C8 H5 F3 O3	3-(trifluoromethoxy) benzoic acid	4.28465e+06	3.84046e+06	3.59247e+06	7.66924e+06	3.66171e+06	3.26953e+06
	5.855_306.16749	306.167	C15 H22 N4 O3	3,3-dimethyl-5-oxo-5-[4-(2-pyrimidinyl)piperazino]pentanoic acid	1.48197e+06	1.51443e+06	1.40372e+06	663610	1.80731e+06	1.47123e+06
	5.412_450.11577	450.116	C21 H22 O11	3,5-dihydroxy-2-(4-hydroxyphenyl)-4-oxo-3,4-dihydro-2h-chromen-7-yl hexopyranoside	748695	1.13385e+06	1.07668e+06	5.92273e+06	699277	1.01366e+06
	4.791_154.02653	154.027	C7 H6 O4	3,5-dihydroxybenzoic acid	1.78391e+08	2.05031e+08	1.9119e+08	2.74141e+07	1.88519e+08	1.84609e+08
	7.986_366.20395	366.204	C20 H30 O6	3-[2-(2,3-dihydroxy-5,6,8a-trimethyloctahydro-2h-spiro[naphthalene-1,2'-oxiran]-5-yl)ethyl]-5-hydroxy-2(5h)-furanone	4.22361e+06	4.35311e+06	4.02317e+06	3.71207e+06	3.23307e+06	4.39857e+06
	4.78_358.12607	358.126	C16 H22 O9	3-[2-(β-d-glucopyranosyloxy)-4-methoxyphenyl]propanoic acid	2.03045e+07	1.92168e+07	2.68472e+07	8.56092e+06	2.15078e+07	2.03938e+07
	8.05_376.20933	376.209	C24 H28 N2 O2	3-[4-(tert-butyl)anilino]-1-[4-(tert-butyl)phenyl]-2,5-dihydro-1h-pyrrole-2,5-dione	1.1536e+06	1.11769e+06	1.18762e+06	3.71913e+06	1.09937e+06	1.20995e+06
	5.548_414.11588	414.116	C19 H18 N4 O7	3-{3-[3,4-dihydroxy-5-(6-oxo-1,6-dihydro-9h-purin-9-yl)tetrahydro-2-furanyl]propanoyl}benzoic acid	3.53015e+06	2.34667e+06	2.54457e+06	1.37879e+06	2.02713e+06	1.85786e+06
	1.134_188.03184	188.032	C7 H8 O6	3-butene-1,2,3-tricarboxylic acid	1.10855e+07	8.91472e+06	8.42927e+06	1.38396e+07	9.41992e+06	8.7411e+06
	5.218_230.10528	230.105	C13 H14 N2 O2	3-carboxymedetomidine	3.69691e+06	4.6948e+06	2.97066e+06	450141	2.53208e+06	3.43353e+06
	6.148_164.04731	164.047	C9 H8 O3	3-coumaric acid	8.37907e+07	8.50043e+07	8.99232e+07	4.22173e+07	7.74391e+07	8.76845e+07
	11.748_490.29215	490.292	C26 H37 F N2 O3	3-fluoro-n-{(1s,2s,4as,7s,8s,8as)-8-hydroxy-1,4a-dimethyl-7-[(2s)-1-oxo-1-(1-pyrrolidinyl)-2-propanyl]decahydro-2-naphthalenyl}benzamide	4.2122e+06	3.81475e+06	4.54373e+06	4.14673e+06	3.99296e+06	3.71803e+06
	0.796_206.04236	206.042	C7 H10 O7	3-hydroxy-3-(methoxycarbonyl)pentanedioic acid	6.16509e+07	5.88559e+07	6.0285e+07	1.25874e+08	6.49843e+07	1.68125e+07
	5.992_432.19907	432.199	C19 H30 O8	3-hydroxy-3,5,5-trimethyl-4-(3-oxo-1-buten-1-ylidene)cyclohexyl β-d-glucopyranoside	6.98815e+06	7.65811e+06	7.45226e+06	3.21531e+06	7.12712e+06	7.29511e+06
	7.512_138.03161	138.032	C7 H6 O3	3-hydroxybenzoic acid	2.0136e+08	2.45946e+08	2.33373e+08	1.00373e+08	2.36992e+08	2.40729e+08
	7.396_202.12040	202.12	C10 H18 O4	3-tert-butyladipic acid	3.05595e+06	3.46166e+06	3.57116e+06	4.47952e+06	3.81908e+06	3.28692e+06
	5.578_282.14624	282.146	C15 H22 O5	4-(2,7-dihydroxy-6-methyl-2-heptanyl)-3-hydroxybenzoic acid	1.12828e+08	1.1872e+08	1.25085e+08	1.76537e+08	1.20811e+08	1.21037e+08
	5.792_460.19393	460.194	C21 H32 O11	4-(4-hydroxyphenyl)-2-butanyl 6-o-[(4ξ)-α-l-threo-pentofuranosyl]-β-d-glucopyranoside	1.79136e+06	1.71141e+06	1.8865e+06	3.05231e+06	1.72371e+06	1.74053e+06
	1.329_330.09469	330.095	C18 H18 O4 S	4,4'-sulfonylbis[2-(prop-2-en-1-yl)phenol]	4.18987e+06	4.06358e+06	4.74258e+06	3.79044e+06	4.45002e+06	3.93394e+06
	7.092_516.12575	516.126	C25 H24 O12	4,5-dicaffeoylquinic acid	32047.3	9.91326e+07	25023.6	71543.4	15707.2	31402.6
	8.671_268.16694	268.167	C15 H24 O4	4,6-dihydroxy-4-(hydroxymethyl)-3,4a,8,8-tetramethyl-4a,5,6,7,8,8a-hexahydro-1(4h)-naphthalenone	1.38135e+06	1.1296e+06	1.19954e+06	567564	994476	854008
	5.883_538.20381	538.204	C26 H34 O12	4-[(2s,3r,4s)-4-hydroxy-4-(4-hydroxy-3-methoxybenzyl)-3-(hydroxymethyl)tetrahydro-2-furanyl]-2-methoxyphenyl β-d-glucopyranoside	1.32531e+06	1.05162e+06	1.13024e+06	432837	949523	918248
	6.454_730.26930	730.269	C32 H44 O16	4-[(2s,3s,4s)-4-[4-(β-d-glucopyranosyloxy)-3-methoxybenzyl]-3-(hydroxymethyl)tetrahydro-2-furanyl]-2-methoxyphenyl β-d-glucopyranoside	2.29361e+06	2.81131e+06	2.00843e+06	2.64944e+06	2.21975e+06	585149
	7.13_492.19785	492.198	C25 H32 O10	4-[7-hydroxy-3-(hydroxymethyl)-5-(3-hydroxypropyl)-2,3-dihydro-1-benzofuran-2-yl]-2-methoxyphenyl 6-deoxy-α-d-mannopyranoside	2.155e+06	2.3269e+06	2.37158e+06	2.36974e+06	2.38576e+06	2.09713e+06
	5.19_328.11565	328.116	C15 H20 O8	4-acetyl-3-hydroxy-5-methylphenyl β-d-glucopyranoside	1.31472e+07	1.26848e+07	1.41415e+07	3.96542e+07	1.02311e+07	1.3668e+07
	7.83_474.17294	474.173	C21 H30 O12	4-allyl-2-(β-d-glucopyranosyloxy)phenyl β-d-glucopyranoside	7.04702e+06	7.18852e+06	6.87522e+06	9.68476e+06	7.40442e+06	6.6631e+06
	6.349_164.04733	164.047	C9 H8 O3	4-coumaric acid	1.9244e+07	1.63022e+07	1.86804e+07	3.04788e+07	2.1078e+07	2.31585e+07
	10.653_472.26634	472.266	C26 H36 N4 O2	4-cyano-n-({(1s,4s,6s)-6-isopropyl-3-methyl-4-[2-(4-methyl-1-piperazinyl)-2-oxoethyl]-2-cyclohexen-1-yl}methyl)benzamide	373827	230475	60199.9	2.00307e+06	265723	400123
	6.102_434.12074	434.121	C21 H22 O10	4h-1-benzopyran-4-one, 6-β-d-glucopyranosyl-2,3-dihydro-5,7-dihydroxy-2-(4-hydroxyphenyl)-, (s)-	1.03356e+07	1.10016e+07	1.17735e+07	3.19703e+07	1.18008e+07	1.15206e+07
	6.911_264.02650	264.026	C9 H12 O7 S	4-hydroxy-3- methoxyphenylglycol sulfate	1.0773e+07	9.72278e+06	1.06541e+07	1.78142e+06	1.59046e+07	1.80293e+07
	4.712_122.03681	122.037	C7 H6 O2	4-hydroxybenzaldehyde	2.10639e+07	2.14022e+07	2.12178e+07	2.16635e+07	2.61861e+06	1.99718e+07
	2.254_147.08951	147.09	C6 H13 N O3	4-Hydroxyisoleucine	3.88151e+06	2.7591e+06	3.42784e+06	5.06671e+06	4.32451e+06	3.12655e+06
	4.175_145.05276	145.053	C9 H7 N O	4-indolecarbaldehyde	969947	1.2157e+06	920920	2.59238e+06	821725	994788
	6.867_124.05250	124.052	C7 H8 O2	4-Methylcatechol	3.62332e+06	4.56275e+06	5.12436e+06	1.91179e+06	7.20302e+06	5.81718e+06
	7.777_464.26146	464.261	C30 H32 N4 O	4-methyl-n-({(2r,4s,5r)-5-[1-methyl-3-(2-naphthyl)-1h-pyrazol-5-yl]-1-azabicyclo[2.2.2]oct-2-yl}methyl)benzamide	1.1035e+07	1.16859e+07	1.17528e+07	1.13799e+07	1.11422e+07	1.09355e+07
	9.132_176.04732	176.047	C10 H8 O3	4-methylumbelliferone	89494	89171.9	85068.2	1.53009e+07	79005.6	90399.6
	7.093_192.04214	192.042	C10 H8 O4	5,7-dihydroxy-4-methylcoumarin	2.28845e+06	2.05075e+06	2.55374e+06	1.56971e+07	2.47599e+06	2.17156e+06
	1.123_131.05814	131.058	C5 H9 N O3	5-Aminolevulinic acid	1.20613e+07	9.92118e+06	8.91563e+06	1.01671e+07	6.11873e+06	7.10388e+06
	3.56_117.07879	117.079	C5 H11 N O2	5-aminovaleric acid	1.52726e+06	1.84135e+06	1.77467e+06	2.87549e+06	1.05972e+06	1.7577e+06
	22.899_347.18409	347.184	C18 H25 N3 O4	5-fluoro amb metabolite 5	3.23116e+06	5.40454e+06	5.48004e+06	4.62704e+06	5.79193e+06	6.36052e+06
	7.015_392.20446	392.204	C20 H26 F2 N4 O2	5-fluoro-3,5-ab-pfuppyca	4.98648e+06	2.8527e+06	3.56214e+06	5.07057e+06	4.12139e+06	3.96508e+06
	1.461_220.08446	220.084	C11 H12 N2 O3	5-Hydroxytryptophan	7.84684e+06	7.82352e+06	8.13016e+06	8.64259e+06	8.82394e+06	8.35527e+06
	4.496_418.11091	418.111	C19 H22 N4 O3 S2	5-isoxazol-5-yl-n-[4-(4-methylpiperazin-1-yl)benzyl]thiophene-2-sulfonamide	211870	220618	175155	1.26015e+07	194261	214529
	7.469_426.19205	426.192	C22 H26 N4 O5	5-methoxy-2-{[(2s)-2-{3-[2-(2-methoxyethoxy)-3-pyridinyl]-1,2,4-oxadiazol-5-yl}-1-pyrrolidinyl]methyl}phenol	5.6348e+06	4.30473e+06	2.76673e+06	724306	3.35796e+06	5.99973e+06
	14.076_380.21711	380.217	C20 H30 O4	6,18,19-trihydroxytrachyloban-2-one	3.84095e+06	3.03407e+06	2.04369e+06	6.91514e+06	2.41339e+06	3.86562e+06
	6.757_188.04722	188.047	C11 H8 O3	6-hydroxy-2-naphthoic acid	5.74505e+06	5.2716e+06	5.89364e+06	9.48939e+06	5.85794e+06	5.51282e+06
	7.27_478.11006	478.11	C22 H22 O12	6-o-[(2e)-3-(4-hydroxyphenyl)-2-propenoyl]-1-o-(3,4,5-trihydroxybenzoyl)hexopyranose	454002	1.11513e+07	421343	144048	370083	279860
	6.586_508.21464	508.215	C21 H34 O11	6-o-pentopyranosyl-1-o-[(2,6,6-trimethyl-1-cyclohexen-1-yl)carbonyl]-β-d-glucopyranose	1.4723e+06	1.49748e+06	1.41887e+06	5.06328e+06	1.17738e+06	989644
	9.12_826.43700	826.437	C42 H66 O16	6-o-β-d-glucopyranosyl-1-o-[(3β,5ξ,9ξ)-3,19,24-trihydroxy-24,28-dioxours-12-en-28-yl]-β-d-glucopyranose	1.55682e+06	2.14353e+06	1.80727e+06	717621	1.7574e+06	1.88972e+06
	19.88_380.16496	380.165	C23 H24 O5	7-{[(2e)-3,7-dimethyl-2,6-octadien-1-yl]oxy}-1,3-dihydroxy-9h-xanthen-9-one	5.73425e+06	9.01134e+06	5.29178e+06	4.05791e+06	1.02091e+07	1.01221e+07
	4.907_380.16784	380.168	C23 H24 O5	7-{[(2e)-3,7-dimethyl-2,6-octadien-1-yl]oxy}-1,3-dihydroxy-9h-xanthen-9-one	7.48078e+07	7.27089e+07	7.52631e+07	1.04479e+08	7.84456e+07	7.8971e+07
	7.88_434.12071	434.121	C21 H22 O10	7-hydroxy-2-(4-hydroxyphenyl)-4-oxo-3,4-dihydro-2h-chromen-5-yl β-d-glucopyranoside	2.00808e+07	1.96671e+07	2.20214e+07	1.82195e+07	2.25014e+07	2.12554e+07
	2.566_494.16260	494.163	C19 H28 O12	8-O-Acetyl shanzhiside methyl ester	1.06914e+07	1.10827e+07	1.02307e+07	5.65987e+06	1.07707e+07	1.03645e+07
	3.873_406.14711	406.147	C17 H26 O11	8-O-Acetylharpagide	4.66102e+06	3.39855e+06	5.13076e+06	1.06184e+06	3.24615e+06	3.32724e+06
	10.875_356.21714	356.217	C20 H28 N4 O2	Ab-chminaca	2.01474e+06	1.62406e+06	1.18397e+06	6.35126e+06	1.33541e+06	1.79794e+06
	8.108_264.13566	264.136	C15 H20 O4	Abscisic acid	3.38584e+06	3.89677e+06	4.1426e+06	8.9022e+06	1.74899e+06	1.80704e+06
	7.647_466.27713	466.277	C25 H34 N6 O3	Acetildenafil	3.20173e+06	2.96384e+06	2.97697e+06	7.1499e+06	2.5512e+06	2.9837e+06
	5.662_382.18368	382.184	C21 H23 F N4 O2	Adb-fubinaca	2.10345e+08	3.11319e+08	2.55384e+08	5.09898e+08	1.66777e+08	1.79083e+08
	7.573_374.19371	374.194	C19 H26 N4 O4	Adb-pinaca pentanoic acid metabolite	1.05619e+07	8.9979e+06	9.23701e+06	5.84157e+06	6.12266e+06	7.74719e+06
	1.084_347.06255	347.063	C10 H14 N5 O7 P	Adenosine 5'-monophosphate	8.28172e+06	9.4919e+06	9.05627e+06	1.26501e+06	5.42595e+06	6.75996e+06
	0.929_427.02876	427.029	C10 H15 N5 O10 P2	Adenosine diphosphate (adp)	1.6344e+07	1.42603e+07	1.99145e+07	3.53386e+06	1.67474e+07	1.26699e+07
	3.831_328.05801	328.058	C17 H12 O7	Aflatoxin g1	1.30235e+07	1.12045e+07	9.91388e+06	2.11861e+07	7.67382e+06	8.113e+06
	6.745_318.11000	318.11	C17 H18 O6	Agarotetrol	2.18268e+06	2.18161e+06	2.14926e+06	3.22318e+06	2.15683e+06	2.19775e+06
	6.67_376.15189	376.152	C20 H24 O7	Ailanthone	7.35298e+06	7.2672e+06	7.53498e+06	1.12889e+07	7.76163e+06	6.98667e+06
	8.703_304.22453	304.225	C16 H32 O5	Aleuritic acid	677304	535519	376619	2.41858e+06	312803	691304
	20.433_578.38154	578.382	C32 H52 O6	Alisol A 24-acetate	974120	1.36959e+06	1.32345e+06	4.90447e+06	2.22834e+06	1.29845e+06
	10.67_288.09931	288.099	C16 H16 O5	Alkannin	2.20171e+06	2.30729e+06	2.29842e+06	4.28427e+06	2.19482e+06	2.07122e+06
	16.352_440.14909	440.149	C19 H20 N8 O5	Aminopterin	1.09015e+06	1.1642e+06	560502	2.10569e+06	781950	1.35372e+06
	11.348_494.25059	494.251	C26 H40 O10	Andrographiside	761740	855955	872481	962185	807143	760399
	7.514_446.08451	446.085	C21 H18 O11	Apigenin 7-O-glucuronide	1.65303e+06	4.4518e+06	2.05674e+06	364685	803759	1.53736e+06
	10.622_504.34389	504.344	C30 H48 O6	Arjungenin	1.9301e+08	2.15551e+08	2.45132e+08	5.82385e+07	2.40195e+08	2.01965e+08
	1.149_176.03189	176.032	C6 H8 O6	Ascorbic acid	1.45803e+07	1.26165e+07	1.27717e+07	1.1532e+07	1.11242e+07	1.24203e+07
	10.501_442.29253	442.293	C24 H42 O7	Ascorbyl stearate	8.46347e+06	1.08266e+07	1.07944e+07	6.95222e+06	8.75693e+06	8.62461e+06
	14.362_488.34910	488.349	C30 H48 O5	Asiatic acid	1.82344e+07	1.07836e+08	3.83384e+07	4.84675e+07	4.67663e+07	4.89431e+07
	13.404_488.34920	488.349	C30 H48 O5	Asiatic acid	1.72657e+08	2.75623e+08	2.27195e+08	3.01288e+08	2.29521e+08	2.0751e+08
	0.744_132.05342	132.053	C4 H8 N2 O3	Asparagine	1.87947e+08	1.7291e+08	2.2595e+08	2.73413e+07	1.21217e+08	1.56516e+08
	2.58_432.12962	432.13	C18 H24 O12	Asperulosidic acid	1.25103e+06	1.28308e+06	1.34719e+06	2.50628e+06	1.10825e+06	1.15243e+06
	5.035_432.12655	432.127	C18 H24 O12	Asperulosidic acid	1.44493e+06	1.2399e+06	1.22409e+06	3.6239e+06	1.35498e+06	1.41788e+06
	6.25_450.11571	450.116	C21 H22 O11	Astilbin	1.0656e+06	1.01948e+06	1.11547e+06	932093	1.11621e+06	1.02953e+06
	7.153_448.10049	448.1	C21 H20 O11	Astragalin	1.91168e+08	2.06969e+08	2.16601e+08	7.1963e+07	2.02618e+08	1.62784e+08
	5.69_406.12599	406.126	C20 H22 O9	Astringin	3.68978e+06	4.07351e+06	4.96594e+06	6.03832e+06	4.8511e+06	5.08404e+06
	9.104_494.23554	494.236	C21 H36 O10	Atractyloside A	6.71432e+06	6.87466e+06	7.23636e+06	6.15643e+06	6.01594e+06	5.33904e+06
	7.525_492.12605	492.126	C23 H24 O12	Aurantio-obtusin β-D-glucoside	1.51039e+06	1.52679e+06	1.90077e+06	1.63741e+06	1.83271e+06	1.94126e+06
	9.95_330.07354	330.074	C17 H14 O7	Aurantio-obtusin	1.43746e+07	1.45902e+07	1.55316e+07	4.31597e+06	1.48854e+07	1.37737e+07
	6.553_373.22093	373.221	C21 H28 F N3 O2	Azidoindolene 1	523533	623469	673980	101614	5.01609e+06	3.79515e+06
	14.459_488.34910	488.349	C30 H48 O5	Bayogenin	1.37277e+07	4.33962e+07	2.17363e+07	3.35912e+07	3.89992e+07	3.15904e+07
	5.664_372.17833	372.178	C16 H28 N4 O4 S	Biocytin	2.94087e+06	2.92649e+06	3.11672e+06	1.58585e+06	2.98104e+06	2.77104e+06
	5.404_244.08777	244.088	C10 H16 N2 O3 S	Biotin	1.88101e+06	1.73792e+06	1.90537e+06	897946	2.12883e+06	2.00937e+06
	7.131_522.20966	522.21	C26 H34 O11	Bruceine A	6.23861e+07	6.70532e+07	6.29578e+07	5.98061e+07	6.65321e+07	6.09005e+07
	5.039_180.04222	180.042	C9 H8 O4	Caffeic acid	2.19099e+07	4.03955e+07	2.9075e+07	3.87249e+06	3.35429e+07	3.40874e+07
	5.323_180.04222	180.042	C9 H8 O4	Caffeic acid	1.37214e+06	1.45398e+06	1.70525e+06	215319	2.46907e+06	2.03132e+06
	6.287_312.04755	312.048	C13 H12 O9	Caftaric acid	184139	1.26624e+07	176039	138059	190426	184388
	2.248_219.11040	219.11	C9 H17 N O5	Calcium pantothenate	2.93625e+08	2.59216e+08	4.02067e+08	5.21509e+08	2.58847e+08	4.09186e+08
	4.696_324.14175	324.142	C20 H20 O4	Calocarpin	2.35691e+08	2.3726e+08	2.5597e+08	2.39419e+08	2.23291e+08	2.47185e+08
	6.685_726.20216	726.202	C32 H38 O19	Camelliaside B	1.68441e+06	1.44409e+06	1.60524e+06	788072	1.63639e+06	1.88589e+06
	4.746_770.21451	770.215	C31 H46 O18 S2	Carboxyatractyloside	1.43884e+06	2.085e+06	1.37518e+06	395004	1.63407e+06	1.69932e+06
	3.627_362.12092	362.121	C15 H22 O10	Catalpol	1.85355e+06	1.6853e+06	1.73422e+06	1.95755e+06	3.09428e+06	1.57647e+06
	8.576_290.07862	290.079	C15 H14 O6	Catechin	1.05133e+07	1.35391e+07	1.48144e+07	3.41256e+06	1.13108e+07	8.4712e+06
	4.648_354.09474	354.095	C16 H18 O9	Chlorogenic acid	501339	1.71254e+07	153414	360485	482491	411297
	5.294_478.12159	478.122	C22 H23 Cl N2 O8	Chlortetracycline	3.64901e+06	4.55548e+06	4.38996e+06	3.47408e+06	6.49186e+06	5.77367e+06
	12.132_254.05752	254.058	C15 H10 O4	Chrysin	1.31205e+06	1.98989e+06	1.17545e+06	1.4301e+06	1.73048e+06	1.85819e+06
	6.287_474.07893	474.079	C22 H18 O12	Cichoric acid	2.86642e+06	2.05544e+08	4.52457e+06	1.26377e+06	1.46896e+06	2.48505e+06
	6.939_130.02659	130.027	C5 H6 O4	Citraconic acid	3.83339e+06	3.97706e+06	3.24497e+06	17648.8	3.00557e+06	2.69353e+06
	1.101_192.02679	192.027	C6 H8 O7	Citric acid	1.027e+09	8.109e+08	1.03538e+09	5.33617e+08	1.09994e+09	9.42738e+08
	0.758_192.02655	192.027	C6 H8 O7	Citric acid	1.60397e+09	1.28595e+09	2.07637e+08	1.96059e+08	1.4988e+09	2.60296e+08
	5.858_240.09949	240.099	C12 H16 O5	Cmpf	6.39685e+06	6.90989e+06	6.93672e+06	7.48755e+06	5.2679e+06	6.177e+06
	9.917_328.22453	328.225	C18 H32 O5	Corchorifatty acid f	3.73081e+08	3.42785e+08	3.039e+08	3.82574e+08	4.02185e+08	3.99388e+08
	3.758_320.10383	320.104	C20 H16 O4	Corylin	4.63437e+06	5.66412e+06	5.42333e+06	2.38629e+06	1.39211e+07	7.81476e+06
	6.084_332.18321	332.183	C23 H26 N2 O3	Cumyl-pica n-pentanoic acid metabolite	2.25768e+08	2.4527e+08	2.61865e+08	9.00927e+07	1.62174e+08	1.69989e+08
	3.365_179.06152	179.062	C6 H13 N O3 S	Cyclamic acid	7.14459e+06	3.50729e+06	3.88102e+06	26879.8	38726.2	38165.8
	5.573_128.08375	128.084	C7 H12 O2	Cyclohexanecarboxylic Acid	5.24084e+06	5.81335e+06	7.28315e+06	7.40509e+06	6.50873e+06	6.72101e+06
	7.867_376.15184	376.152	C20 H24 O7	Cycloolivil	1.22928e+07	1.24881e+07	1.22772e+07	1.45555e+07	1.07431e+07	1.14689e+07
	5.188_457.15794	457.158	C20 H27 N O11	D(-)-amygdalin	1.09718e+06	1.12668e+06	1.02599e+06	4.65745e+06	984901	1.01833e+06
	0.782_180.06316	180.063	C6 H12 O6	D-(-)-fructose	9.3424e+08	7.32651e+08	8.77844e+08	7.56302e+08	7.31059e+08	9.96703e+08
	0.743_146.06895	146.069	C5 H10 N2 O3	D-(-)-glutamine	2.55603e+08	3.34433e+08	3.63601e+08	3.97551e+08	4.37646e+08	3.72357e+08
	0.782_150.05261	150.053	C5 H10 O5	D-(-)-lyxose	2.24274e+08	3.09714e+08	2.47048e+08	2.19227e+08	2.01514e+08	3.10752e+08
	1.204_192.06312	192.063	C7 H12 O6	D-(-)-quinic acid	1.09255e+08	9.7774e+07	1.0814e+08	1.36022e+08	1.11936e+08	1.03746e+08
	2.323_332.11006	332.11	C13 H18 O7	D(-)-Salicin	1.8001e+06	2.25279e+06	2.28797e+06	3.35734e+06	2.38588e+06	2.50916e+06
	0.745_226.06866	226.069	C6 H12 O6	D-(+)-glucose	1.80281e+08	9.41776e+07	9.13309e+07	7.37839e+07	9.14825e+07	9.78216e+07
	5.462_134.02141	134.021	C4 H6 O5	D-(+)-malic acid	4.21909e+07	521473	1.03136e+06	648924	3.87128e+06	1.05936e+06
	9.612_168.04220	168.042	C8 H8 O4	Dehydroacetic acid	1.722e+06	2.13784e+06	2.15363e+06	988465	2.21688e+06	2.23191e+06
	0.812_174.01617	174.016	C6 H6 O6	Dehydroascorbic acid	1.06918e+08	6.64729e+07	8.72097e+07	5.75383e+07	1.03359e+08	9.89707e+07
	0.762_136.03705	136.037	C4 H8 O5	D-Erythronic acid	7.02379e+08	6.11175e+08	5.63692e+08	7.01339e+08	5.07309e+08	6.79052e+08
	8.092_404.14671	404.147	C21 H24 O8	Desoxyrhaponticin	759227	896863	946390	3.0057e+06	795612	818856
	6.209_214.13159	214.132	C10 H18 N2 O3	Desthiobiotin	1.85748e+06	1.97854e+06	2.15362e+06	758094	1.99187e+06	1.95887e+06
	5.81_434.21474	434.215	C24 H31 F O6	Dexamethasone acetate	1.02443e+07	9.63717e+06	1.03343e+07	7.37747e+06	1.07169e+07	9.40338e+06
	0.65_339.99565	339.996	C6 H14 O12 P2	D-Fructose-1,6-diphosphate	2.53776e+06	3.6065e+06	3.29357e+06	204317	2.20029e+06	1.7552e+06
	7.374_374.13623	374.136	C20 H22 O7	Diffractic acid	2.46601e+06	2.27045e+06	2.12516e+06	3.03263e+06	1.9449e+06	2.04768e+06
	10.308_520.33929	520.339	C30 H48 O7	Dihydrocucurbitacin F	354762	7.89537e+06	860278	564809	559327	947836
	5.459_320.05294	320.053	C15 H12 O8	Dihydromyricetin	5.57811e+08	6.31653e+08	7.10247e+08	2.14296e+08	7.91259e+08	6.98836e+08
	15.74_396.15946	396.159	C23 H24 O6	Dimethylcurcumin	6.1442e+06	5.52605e+06	3.1091e+06	6.52754e+06	3.95031e+06	6.29845e+06
	5.31_390.15217	390.152	C17 H20 N4 O4	Disperse red 17	6.94702e+06	6.51009e+06	6.56852e+06	1.97185e+06	7.13494e+06	6.31754e+06
	2.038_174.10907	174.109	C6 H14 N4 O2	Dl-arginine	2.67843e+07	2.84527e+07	2.62138e+07	1.37328e+07	3.62609e+07	2.48343e+07
	0.814_134.02138	134.021	C4 H6 O5	Dl-malic acid	3.63584e+09	2.91942e+09	3.52774e+09	2.05722e+09	3.99344e+09	3.75126e+09
	5.263_182.05786	182.058	C9 H10 O4	DL-p-Hydroxyphenyllactic acid	2.91843e+06	2.78658e+06	2.67993e+06	3.96024e+06	2.92305e+06	3.05036e+06
	0.773_150.01629	150.016	C4 H6 O6	DL-Tartaric acid	1.4455e+07	1.36976e+07	1.11859e+07	2.35053e+06	1.00213e+07	1.38615e+07
	3.821_204.08973	204.09	C11 H12 N2 O2	Dl-tryptophan	4.18002e+08	3.85748e+08	4.74384e+08	3.10516e+08	4.03185e+08	3.85741e+08
	1.279_131.09460	131.095	C6 H13 N O2	DL-β-Leucine	3.04073e+07	3.10511e+07	3.19902e+07	2.85238e+07	2.20981e+07	2.26374e+07
	1.404_131.09457	131.095	C6 H13 N O2	Dl-β-leucine	6.3011e+07	6.90238e+07	6.52919e+07	6.57486e+07	5.51048e+07	5.12489e+07
	0.693_260.02922	260.029	C6 H13 O9 P	D-mannose 6-phosphate	1.05062e+08	8.82909e+07	7.7474e+07	3.01827e+07	6.44577e+07	8.06381e+07
	8.296_230.15146	230.151	C12 H22 O4	Dodecanedioic acid	139071	82695.9	63807	1.01821e+06	46538.5	152423
	1.08_504.16773	504.168	C18 H32 O16	D-raffinose	4.52754e+06	2.45739e+06	1.92203e+06	1.41074e+07	1.83676e+06	5.89002e+06
	5.027_290.04227	290.042	C7 H15 O10 P	D-sedoheptulose 7-phosphate	6.60021e+06	7.03338e+06	7.99329e+06	1.17743e+07	7.60946e+06	7.12749e+06
	1.104_148.03691	148.037	C5 H8 O5	D-α-hydroxyglutaric acid	1.71968e+07	1.50194e+07	1.53659e+07	1.71766e+07	1.66732e+07	1.48346e+07
	17.351_472.35441	472.354	C30 H48 O4	Echinocystic acid	9.02473e+06	3.43685e+07	1.82694e+07	2.44702e+07	2.0233e+07	2.01858e+07
	2.438_306.07377	306.074	C15 H14 O7	Epigallocatechin	3.57024e+09	4.147e+09	5.10036e+09	1.61229e+09	5.86587e+09	4.52021e+09
	12.625_464.24028	464.24	C25 H36 O8	Epitestosterone glucuronide	1.06007e+06	921123	596717	1.89128e+06	639557	989390
	5.008_596.17353	596.174	C27 H32 O15	Eriocitrin	5.78229e+06	4.89052e+06	4.6395e+06	6.8417e+06	4.64015e+06	5.2921e+06
	6.041_596.17427	596.174	C27 H32 O15	Eriocitrin	218931	317108	234467	1.57125e+06	208716	296295
	8.538_288.06296	288.063	C15 H12 O6	Eriodictyol	4.22006e+06	4.64518e+06	5.36965e+06	1.69994e+06	4.96214e+06	4.35314e+06
	4.901_178.02652	178.027	C9 H6 O4	Esculetin	1.76924e+07	1.98289e+07	1.968e+07	9.32838e+06	1.89797e+07	1.99725e+07
	1.883_368.13162	368.132	C18 H24 O6 S	Estriol 17-sulfate	7.71302e+06	8.1927e+06	7.77638e+06	2.48097e+07	9.61455e+06	9.87166e+06
	6.493_270.15748	270.157	C18 H22 O2	Estrone	3.55623e+06	3.86147e+06	4.13537e+06	7.74986e+06	4.21066e+06	3.99039e+06
	1.183_222.07352	222.074	C8 H14 O7	Ethyl-β-d-glucuronide	1.35305e+06	1.38893e+06	1.45129e+06	1.17086e+07	1.40868e+06	1.34385e+06
	6.73_348.15703	348.157	C19 H24 O6	Eurycomalactone	2.71608e+06	2.87677e+06	2.89416e+06	1.6528e+06	2.94567e+06	2.73318e+06
	14.759_394.14383	394.144	C26 H19 F N2 O	Fdu-nnei	2.38313e+06	2.80904e+06	1.53805e+06	2.56454e+06	1.63652e+06	2.38166e+06
	7.431_178.06294	178.063	C10 H10 O3	Ferulaldehyde	1.88558e+07	2.25069e+07	2.18776e+07	1.44074e+07	3.02701e+07	2.48911e+07
	6.627_194.05774	194.058	C10 H10 O4	Ferulic acid	5.56651e+07	6.50634e+07	6.71028e+07	2.97599e+07	6.10045e+07	6.10806e+07
	4.723_456.10414	456.104	C17 H21 N4 O9 P	Flavin mononucleotide	5.39439e+06	5.91112e+06	6.30087e+06	930357	9.83824e+06	6.2897e+06
	3.599_473.16503	473.165	C20 H23 N7 O7	Folinic acid	2.64252e+07	2.77947e+07	2.49542e+07	1.95222e+07	2.82234e+07	2.60301e+07
	7.197_580.21542	580.215	C27 H34 O11	Forsythin	2.7684e+06	2.72033e+06	2.63855e+06	3.28685e+06	2.51715e+06	2.66021e+06
	4.717_462.17395	462.174	C20 H30 O12	Forsythoside E	5.11899e+06	3.23337e+06	4.5448e+06	2.89213e+06	4.23607e+06	4.85078e+06
	0.836_116.01097	116.011	C4 H4 O4	Fumaric acid	3.02854e+08	2.71255e+08	2.84898e+08	2.05259e+08	3.41385e+08	3.03919e+08
	1.479_170.02143	170.021	C7 H6 O5	Gallic acid	1.43659e+09	1.38452e+09	1.43016e+09	3.72549e+08	1.52064e+09	1.38205e+09
	0.911_170.02143	170.021	C7 H6 O5	Gallic acid	7.17251e+07	6.01946e+07	7.4669e+07	2.36291e+07	6.90942e+07	6.34361e+07
	5.081_388.13665	388.137	C17 H24 O10	Geniposide	1.49705e+07	1.35308e+07	1.40963e+07	9.44229e+06	1.34383e+07	1.40002e+07
	3.941_374.12096	374.121	C16 H22 O10	Geniposidic acid	2.81614e+06	3.19922e+06	2.70191e+06	6.27315e+06	2.66077e+06	3.05509e+06
	5.185_356.11070	356.111	C16 H20 O9	Gentiopicrin	617669	645134	823905	3.68022e+06	623556	693433
	1.423_154.02659	154.027	C7 H6 O4	Gentisic acid	4.38804e+07	4.79475e+07	5.66438e+07	6.44291e+06	7.03282e+07	3.85213e+07
	8.209_330.14639	330.146	C19 H22 O5	Gibberellin a7	1.07241e+07	1.98244e+07	1.49897e+07	1.30482e+07	1.27842e+07	1.09725e+07
	5.658_445.17910	445.179	C21 H27 N5 O4 S	Glipizide	1.13481e+07	1.81259e+07	1.48566e+07	3.4443e+07	1.15264e+07	1.07779e+07
	0.75_196.05793	196.058	C6 H12 O7	Gluconic acid	8.73873e+08	6.91237e+08	6.49603e+08	5.68456e+08	6.83798e+08	8.59747e+08
	1.638_132.04220	132.042	C5 H8 O4	Glutaric acid	1.4153e+07	9.51409e+06	9.41914e+06	1.44972e+07	8.85876e+06	9.49883e+06
	13.98_453.28490	453.285	C21 H44 N O7 P	Glycerophospho-n-palmitoyl ethanolamine	2.62504e+06	2.59239e+06	2.32608e+06	6.89898e+06	3.29873e+06	2.92644e+06
	3.064_188.11596	188.116	C8 H16 N2 O3	Glycyl-l-leucine	4.91588e+06	6.51511e+06	5.14332e+06	1.43312e+06	1.4663e+07	9.79124e+06
	1.301_238.09499	238.095	C11 H14 N2 O4	Glycyl-L-tyrosine	1.96019e+06	1.7581e+06	2.31075e+06	529368	8.47106e+06	5.36291e+06
	6.274_740.21773	740.218	C33 H40 O19	Grosvenorine	293902	215402	210534	2.57089e+06	198631	185863
	5.554_364.13655	364.137	C15 H24 O10	Harpagide	1.35665e+06	1.56323e+06	1.67058e+06	2.90828e+06	2.17368e+06	2.00566e+06
	5.588_330.09475	330.095	C13 H16 O7	Helicid	2.80479e+06	3.16021e+06	3.33282e+06	3.31187e+06	3.29021e+06	4.46397e+06
	7.779_302.04226	302.042	C15 H10 O7	Herbacetin	2.85541e+07	3.27984e+07	3.0778e+07	1.59224e+07	3.25224e+07	2.93452e+07
	11.577_286.21391	286.214	C16 H30 O4	Hexadecanedioic acid	5.17138e+06	4.31682e+06	3.3047e+06	3.3516e+07	5.89406e+06	6.16496e+06
	7.678_448.10034	448.1	C21 H20 O11	Homoorientin	5.76957e+06	5.21467e+06	4.48923e+06	4.30975e+06	4.07017e+06	3.67687e+06
	8.624_182.05785	182.058	C9 H10 O4	Homovanillic acid	1.08269e+07	1.21135e+07	1.31447e+07	1.10386e+07	1.41966e+07	1.34767e+07
	5.911_290.08984	290.09	C14 H14 N2 O5	Indole-3-acetyl-l-aspartic acid	1.4688e+06	1.72615e+06	1.76937e+06	52106.4	4.33037e+06	3.58875e+06
	5.685_205.07368	205.074	C11 H11 N O3	Indole-3-lactic acid	1.94161e+07	1.90277e+07	2.35748e+07	1.34701e+07	9.74283e+06	1.18235e+07
	7.03_280.13067	280.131	C18 H16 O3	Ipriflavone	9.15175e+06	1.0027e+07	1.141e+07	2.16514e+06	4.08457e+06	4.15443e+06
	7.292_522.13600	522.136	C24 H26 O13	Iridin	561036	645599	619102	968861	447722	489314
	3.053_436.10005	436.1	C20 H20 O11	Irisxanthone	1.65999e+06	1.43656e+06	1.1137e+06	3.55476e+06	704245	980919
	4.702_516.12581	516.126	C25 H24 O12	Isochlorogenic acid B	3.07945e+06	3.16175e+06	2.22923e+06	505888	1.08153e+06	1.58489e+06
	1.116_283.09110	283.091	C10 H13 N5 O5	Isoguanosine	1.32409e+07	1.05849e+07	1.24575e+07	3.96036e+06	1.14899e+07	1.39614e+07
	1.142_422.08424	422.084	C19 H18 O11	Isomangiferin	4.81485e+06	6.04726e+06	7.54748e+06	877233	7.31336e+06	4.76506e+06
	6.646_464.09474	464.095	C21 H20 O12	Isoquercitrin	8.35439e+07	8.96058e+07	9.96324e+07	4.25038e+07	8.31215e+07	8.62795e+07
	8.86_316.05791	316.058	C16 H12 O7	Isorhamnetin	1.05715e+07	1.11713e+07	1.1981e+07	3.31897e+06	1.08802e+07	1.03415e+07
	12.131_258.08876	258.089	C15 H14 O4	Isorhapontigenin	1.13789e+06	1.26767e+06	1.34409e+06	4.0887e+06	1.36753e+06	1.27998e+06
	6.532_192.04213	192.042	C10 H8 O4	Isoscopoletin	7.89015e+06	1.51539e+07	1.09043e+07	4.38137e+06	8.42836e+06	8.439e+06
	6.634_594.15804	594.158	C27 H30 O15	Kaempferol 3-glucorhamnoside	1.39949e+08	1.43947e+08	1.47992e+08	1.69861e+08	1.23779e+08	1.35842e+08
	9.926_286.04722	286.047	C15 H10 O6	Kaempferol	6.90402e+07	6.20025e+07	6.58982e+07	8.02497e+06	7.30144e+07	6.07274e+07
	15.996_530.30779	530.308	C28 H42 N4 O6	Kukoamine A	1.07978e+07	1.2871e+07	1.32984e+07	1.72083e+07	2.64806e+07	1.63892e+07
	16.286_530.31227	530.312	C28 H42 N4 O6	Kukoamine B	1.37643e+06	2.22839e+06	2.17994e+06	2.07715e+06	3.13562e+06	2.4795e+06
	7.436_166.06295	166.063	C9 H10 O3	L-(-)-3-phenyllactic acid	6.04342e+06	5.63114e+06	5.85745e+06	7.6197e+06	4.42943e+06	4.43117e+06
	17.292_324.26607	324.266	C20 H36 O3	Labdanolic acid	2.00526e+06	2.03712e+06	1.14045e+06	7.33956e+06	1.51916e+06	2.01404e+06
	1.664_422.14205	422.142	C17 H26 O12	Lamalbid	6.96202e+06	6.7689e+06	6.90702e+06	3.85991e+06	5.15564e+06	5.37553e+06
	5.496_522.20898	522.209	C26 H34 O11	Lariciresinol 4-o-glucoside	6.54433e+06	5.84677e+06	6.86196e+06	4.57187e+06	6.45394e+06	6.28884e+06
	0.751_133.03742	133.037	C4 H7 N O4	L-aspartic acid	5.80995e+07	5.27112e+07	6.41778e+07	1.1829e+07	9.64444e+07	6.96584e+07
	6.74_580.14267	580.143	C26 H28 O15	Leucoside	3.50786e+06	3.68274e+06	3.49115e+06	2.3315e+06	3.28696e+06	3.6645e+06
	4.141_228.14718	228.147	C11 H20 N2 O3	Leucylproline	6.0024e+06	5.37423e+06	5.47798e+06	1.42619e+06	1.91368e+07	1.24534e+07
	1.757_116.04736	116.047	C5 H8 O3	Levulinic acid	9.7269e+06	7.50906e+06	7.98037e+06	6.92357e+06	5.424e+06	5.89037e+06
	0.752_147.05300	147.053	C5 H9 N O4	L-glutamic acid	2.58372e+08	2.38539e+08	2.56177e+08	2.13015e+08	2.96326e+08	3.23734e+08
	1.101_612.15287	612.153	C20 H32 N6 O12 S2	L-glutathione oxidized	4.51587e+07	2.26914e+07	2.38867e+07	1.19556e+07	4.0612e+07	3.51973e+07
	9.154_520.33895	520.339	C28 H48 N4 O3 S	Linoleic acid-biotin	3.69999e+06	2.36493e+07	1.25141e+07	1.10465e+07	8.86145e+06	5.80617e+06
	5.349_131.09458	131.095	C6 H13 N O2	L-Isoleucine	2.8949e+06	3.40218e+06	2.92259e+06	1.5922e+06	3.05039e+06	3.43807e+06
	2.972_376.13659	376.137	C16 H24 O10	Loganic acid	7.36646e+06	3.8528e+06	3.47336e+06	2.74911e+07	4.75976e+06	7.03626e+06
	1.701_436.15747	436.157	C17 H26 O10	Loganin	5.85362e+06	5.80801e+06	5.55056e+06	5.84118e+06	5.69738e+06	5.45052e+06
	2.027_165.07898	165.079	C9 H11 N O2	L-phenylalanine	7.48311e+07	7.34516e+07	2.86818e+08	1.23333e+08	3.46976e+08	3.00166e+08
	0.748_180.06310	180.063	C6 H12 O6	L-Sorbose	8.15547e+08	5.15549e+08	5.13055e+08	3.71709e+08	5.48553e+08	6.34137e+08
	1.362_174.10025	174.1	C7 H14 N2 O3	L-Theanine	2.64351e+06	2.20511e+06	2.55111e+06	851727	3.55051e+06	2.49772e+06
	5.71_286.04639	286.046	C15 H10 O6	Luteolin	8.25077e+06	1.31256e+07	1.22586e+07	1.93892e+06	9.52417e+06	8.47556e+06
	5.638_462.07918	462.079	C21 H18 O12	Luteolin 7-glucuronide	270208	215914	176664	1.68487e+06	125283	173063
	10.331_610.27662	610.277	C35 H38 N4 O6	Manidipine	480360	641919	480290	1.05195e+06	945530	665091
	4.963_524.17255	524.173	C21 H32 O15	Melittoside	1.41387e+06	1.64619e+06	1.54322e+06	6.47062e+06	1.63603e+06	1.55014e+06
	21.708_484.22882	484.229	C29 H29 F N4 O2	Methyl (2r,4s,6s,12br)-4-(4-fluorophenyl)-2-[(3-pyridinylmethyl)amino]-1,2,3,4,6,7,12,12b-octahydroindolo[2,3-a]quinolizine-6-carboxylate	1.85482e+06	2.17016e+06	1.98158e+06	1.76161e+06	2.57485e+06	2.54206e+06
	4.549_332.08927	332.089	C17 H16 O7	Methyl (7-hydroxy-11-methyl-2,9-dioxo-12,15-dioxatetracyclo[8.4.1.01,10 03,8]pentadeca-3,5,7-trien-13-yl)acetate	6.09488e+06	5.74104e+06	4.57858e+06	159486	6.1379e+06	4.08909e+06
	1.443_450.13615	450.136	C17 H24 O11	Methyl 1-(hexopyranosyloxy)-5-hydroxy-7-(hydroxymethyl)-1,4a,5,7a-tetrahydrocyclopenta[c]pyran-4-carboxylate	6.09383e+06	4.39455e+06	4.90848e+06	5.46601e+06	4.82058e+06	4.74047e+06
	4.497_368.16806	368.168	C21 H24 N2 O4	Methyl 19-methyl-2-oxoformosanan-16-carboxylate	1.42233e+07	1.40453e+07	1.28204e+07	1.88647e+07	1.13836e+07	1.12634e+07
	9.17_178.06295	178.063	C10 H10 O3	Methyl 4-hydroxycinnamate	4.61976e+06	5.5355e+06	6.3599e+06	897377	6.11537e+06	5.46059e+06
	7.69_166.06289	166.063	C9 H10 O3	Methyl 4-hydroxyphenylacetate	795972	736661	735878	9.9777e+06	757822	768398
	3.471_184.03702	184.037	C8 H8 O5	Methyl gallate	3.37794e+06	3.61719e+06	3.88336e+06	2.18274e+06	4.07298e+06	4.37895e+06
	3.545_202.08400	202.084	C9 H14 O5	Methyloxalacetic acid diethyl ester	6.32567e+06	6.84265e+06	5.92687e+06	6.52227e+06	5.72576e+06	5.76335e+06
	14.556_429.27217	429.272	C29 H35 N O2	Mifepristone	124086	147848	121287	1.44191e+06	114094	101181
	8.766_302.04225	302.042	C15 H10 O7	Morin	5.46939e+07	4.81613e+07	5.15268e+07	6.27211e+06	4.94657e+07	4.01817e+07
	0.772_210.03731	210.037	C6 H10 O8	Mucic acid	2.29529e+09	1.75869e+09	7.20767e+08	1.07635e+09	1.5911e+09	7.31647e+08
	5.3_422.17183	422.172	C25 H26 O6	Mulberrin	2.24005e+07	2.28014e+07	2.20811e+07	1.94878e+07	1.82506e+07	1.77588e+07
	5.417_376.13739	376.137	C16 H24 O10	Mussaenosidic acid	2.32909e+06	3.14953e+06	3.59649e+06	2.46585e+06	4.22207e+06	3.79889e+06
	7.578_318.03722	318.037	C15 H10 O8	Myricetin	2.13736e+08	2.27258e+08	2.30237e+08	3.4543e+07	2.53189e+08	2.1224e+08
	3.828_464.09485	464.095	C21 H20 O12	Myricitrin	1.87348e+07	1.66439e+07	1.31208e+07	2.42007e+07	1.06777e+07	1.05351e+07
	9.702_401.27742	401.277	C21 H39 N O6	Myriocin	1.18446e+06	1.01428e+06	612244	4.21007e+06	864403	1.20573e+06
	14.767_432.25071	432.251	C25 H36 N2 O2	N-({(1s,4s,6s)-4-[2-(cyclopentylamino)-2-oxoethyl]-6-isopropyl-3-methyl-2-cyclohexen-1-yl}methyl)benzamide	4.07617e+06	4.80258e+06	4.58366e+06	4.17851e+07	6.9315e+06	5.97398e+06
	8.207_432.23541	432.235	C24 H36 N2 O3 S	N-({(1s,4s,6s)-6-isopropyl-3-methyl-4-[2-oxo-2-(1-pyrrolidinyl)ethyl]-2-cyclohexen-1-yl}methyl)-1-phenylmethanesulfonamide	1.22471e+06	1.12115e+06	1.13732e+06	1.29263e+06	1.28045e+06	1.43066e+06
	5.572_364.17298	364.173	C16 H28 N2 O5	N-({(2r,3s,4r,5s)-3,4-dihydroxy-5-[2-(isopropylamino)-2-oxoethyl]tetrahydro-2-furanyl}methyl)cyclopentanecarboxamide	3.01919e+07	3.32712e+07	2.84899e+07	1.49933e+07	2.70257e+07	3.35881e+07
	6.53_540.24068	540.241	C30 H30 N4 O3	N-({(2r,4s,5r)-5-[1-methyl-3-(2-naphthyl)-1h-pyrazol-5-yl]-1-azabicyclo[2.2.2]oct-2-yl}methyl)-1,3-benzodioxole-5-carboxamide	2.4008e+06	2.55117e+06	2.16102e+06	3.59336e+06	1.2661e+06	1.19214e+06
	5.308_486.17287	486.173	C25 H25 F3 N4 O S	N-({(2r,4s,5r)-5-[2-methyl-6-(2-thienyl)-4-pyrimidinyl]-1-azabicyclo[2.2.2]oct-2-yl}methyl)-4-(trifluoromethyl)benzamide	947368	995404	944167	2.45291e+07	1.00975e+06	827158
	7.05_396.19913	396.199	C22 H28 N4 O S	N-({(2r,4s,5r)-5-[2-methyl-6-(2-thienyl)-4-pyrimidinyl]-1-azabicyclo[2.2.2]oct-2-yl}methyl)cyclobutanecarboxamide	1.2281e+07	1.46596e+07	1.3263e+07	2.20022e+07	1.08426e+07	1.39864e+07
	3.504_438.13684	438.137	C18 H24 N4 O2 S2	N-({(2r,4s,5r)-5-[2-methyl-6-(2-thienyl)-4-pyrimidinyl]-1-azabicyclo[2.2.2]oct-2-yl}methyl)methanesulfonamide	6.4788e+06	6.32445e+06	5.86286e+06	1.29003e+07	6.94795e+06	5.89498e+06
	8.931_490.27690	490.277	C26 H38 N4 O3	N-({(2r,4s,5r)-5-[3-(3,4-dimethoxyphenyl)-1-methyl-1h-pyrazol-5-yl]-1-azabicyclo[2.2.2]oct-2-yl}methyl)-2-ethylbutanamide	1.26907e+06	928007	702511	2.21236e+06	919721	993673
	8.005_492.12584	492.126	C22 H29 Br N4 O2 S	N-({(2r,4s,5r)-5-[6-(2-bromophenyl)-2-methyl-4-pyrimidinyl]-1-azabicyclo[2.2.2]oct-2-yl}methyl)-1-propanesulfonamide	1.10832e+06	1.90635e+06	1.39298e+06	401846	1.10232e+06	1.15901e+06
	6.223_440.18873	440.189	C18 H26 N4 O6	N-(1-amino-1-oxo-2-propanyl)-1,3,4-trihydroxy-5-{[(4-methylphenyl)carbamoyl]amino}cyclohexanecarboxamide	1.18666e+07	1.12281e+07	1.08587e+07	1.3015e+07	1.05484e+07	1.2221e+07
	8.13_424.16631	424.166	C24 H20 N6 O2	N-(2-{4-[5-(acetylamino)-1h-benzimidazol-2-yl]phenyl}-1h-benzimidazol-5-yl)acetamide	2.42984e+06	2.7519e+06	2.95974e+06	1.20869e+06	2.62086e+06	2.54257e+06
	21.132_356.16510	356.165	C16 H24 N4 O3	N-(2-furylmethyl)-3-[(2s,5as,8ar)-1-methyl-5-oxodecahydropyrrolo[3,2-e][1,4]diazepin-2-yl]propanamide	1.2615e+07	1.63753e+07	1.05297e+07	1.70371e+07	1.56056e+07	1.36727e+07
	8.827_334.10493	334.105	C17 H19 Cl N2 O3	N-(3-chloro-4-morpholinophenyl)-2,5-dimethyl-3-furamide	1.36681e+06	1.56461e+06	1.74342e+06	132558	1.60103e+06	1.52693e+06
	5.659_496.17645	496.176	C25 H26 N2 O4 S	N-(4-{(r)-hydroxy[(3r)-5-oxo-4-(3-phenylpropyl)-3-morpholinyl]methyl}phenyl)-2-thiophenecarboxamide	1.54653e+06	2.13901e+06	1.85283e+06	3.50102e+06	1.32382e+06	1.25878e+06
	7.199_324.16817	324.168	C17 H20 N6 O	N-(4-cyano-1-phenyl-1h-pyrazol-5-yl)-2-(4-methylpiperazino)acetamide	6.77421e+06	6.08016e+06	6.48087e+06	6.19599e+06	2.89471e+06	4.17347e+06
	14.907_460.25835	460.258	C25 H36 N4 O2	N-(4-cyanobenzyl)-2-[(1s,4s,5s)-5-isopropyl-4-{[(isopropylcarbamoyl)amino]methyl}-2-methyl-2-cyclohexen-1-yl]acetamide	9.9724e+06	7.73578e+06	6.48111e+06	4.44659e+06	2.1493e+06	5.00356e+06
	5.661_482.10803	482.108	C21 H19 Cl2 F3 N6	N-(5-chloro-6-methyl-2-pyridin-2-ylpyrimidin-4-yl)-n-{1-[3-chloro-5-(trifluoromethyl)pyridin-2-yl]piperidin-4-yl}amine	3.02546e+06	4.8606e+06	3.74537e+06	4.68976e+06	2.87368e+06	2.77651e+06
	5.715_436.23034	436.23	C23 H28 N6 O3	N-[(1r,9s)-11-(1-acetyl-4-piperidinyl)-6-oxo-7,11-diazatricyclo[7.3.1.02,7]trideca-2,4-dien-3-yl]-2-pyrazinecarboxamide	1.23256e+06	653753	657444	8.41247e+06	708504	678596
	16.989_446.26619	446.266	C27 H36 N4 O3	N-[(1s,2s,8s,8as)-8-hydroxy-1,4a-dimethyl-7-{(2s)-1-oxo-1-[(3-pyridinylmethyl)amino]-2-propanyl}decahydro-2-naphthalenyl]-2-pyridinecarboxamide	4.08195e+06	4.69463e+06	5.1687e+06	6.71389e+07	9.09742e+06	6.28602e+06
	13.982_508.27902	508.279	C26 H40 N4 O4	N-[(1s,2s,8s,8as)-8-hydroxy-7-{(2s)-1-[(2r)-2-(methoxymethyl)-1-pyrrolidinyl]-1-oxo-2-propanyl}-1,4a-dimethyldecahydro-2-naphthalenyl]-5-pyrimidinecarboxamide	1.93743e+07	2.24522e+07	2.39821e+07	4.92373e+07	3.96281e+07	3.02119e+07
	17.899_548.33341	548.333	C32 H44 N4 O4	N-[(1s,3as,5s,7ar)-5-hydroxy-7a-{3-[4-(2-methoxyphenyl)-1-piperazinyl]-3-oxopropyl}-3,3,5-trimethyloctahydro-1h-inden-1-yl]nicotinamide	1.6347e+06	1.71454e+06	1.9747e+06	2.97092e+06	2.51828e+06	1.86594e+06
	5.137_407.17225	407.172	C23 H25 N3 O2 S	N-[(1s,4s)-4-(1-benzyl-3,5-dimethyl-1h-pyrazol-4-yl)-2-cyclopenten-1-yl]benzenesulfonamide	5.02851e+07	3.81012e+07	5.18038e+07	1.29447e+07	2.15087e+07	3.28683e+07
	5.778_454.20433	454.204	C27 H26 N4 O3	N-[(6as,8s)-2-(2,3-dimethylphenyl)-6,12-dioxo-5,6,6a,7,8,9,10,12-octahydropyrido[2,1-c][1,4]benzodiazepin-8-yl]nicotinamide	1.3609e+06	1.21507e+06	1.32378e+06	1.19592e+06	1.3956e+06	1.52748e+06
	16.525_450.27396	450.274	C24 H38 N4 O2	N-[2-(dimethylamino)ethyl]-2-[(1s,4s,5s)-5-isopropyl-2-methyl-4-{[(phenylcarbamoyl)amino]methyl}-2-cyclohexen-1-yl]acetamide	2.68658e+07	3.40728e+07	4.07085e+07	5.37662e+06	1.31036e+06	2.84188e+07
	7.22_400.07904	400.079	C14 H14 F6 N4 O S	N-[3,5-bis(trifluoromethyl)phenyl]-n'-[2-(2-oxo-1-imidazolidinyl)ethyl]thiourea	2.34168e+07	2.41449e+07	2.25489e+07	1.21671e+07	2.37677e+07	2.76386e+07
	9.068_445.26701	445.267	C28 H37 N3 O3	N-{(1s,2s,8s,8as)-7-[(2s)-1-(benzylamino)-1-oxo-2-propanyl]-8-hydroxy-1,4a-dimethyldecahydro-2-naphthalenyl}-2-pyridinecarboxamide	1.1394e+06	821294	351102	3.96946e+06	862959	1.15277e+06
	8.519_443.25142	443.251	C28 H33 N3 O2	N-{[(1s,4s,6s)-4-{2-[(4-cyanobenzyl)amino]-2-oxoethyl}-6-isopropyl-3-methyl-2-cyclohexen-1-yl]methyl}benzamide	429001	299124	89677.1	1.21379e+06	382202	425454
	5.362_476.18865	476.189	C21 H26 N4 O6	N-{[(2r,3s,4r,5s)-3,4-dihydroxy-5-{2-oxo-2-[4-(2-pyridinyl)-1-piperazinyl]ethyl}tetrahydro-2-furanyl]methyl}-2-furamide	7.6131e+06	8.41321e+06	7.38422e+06	6.0099e+06	8.3451e+06	7.56135e+06
	6.368_398.16069	398.161	C19 H26 N2 O5	N-{[(2r,3s,4r,5s)-5-(2-anilino-2-oxoethyl)-3,4-dihydroxytetrahydro-2-furanyl]methyl}cyclopentanecarboxamide	2.84317e+06	2.65888e+06	1.92386e+06	2.73287e+06	1.64329e+06	2.79347e+06
	4.01_458.19938	458.199	C23 H28 N2 O5	N-{[(2r,3s,4r,5s)-5-{2-[benzyl(methyl)amino]-2-oxoethyl}-3,4-dihydroxytetrahydro-2-furanyl]methyl}-4-methylbenzamide	1.53272e+07	8.66358e+06	7.06355e+06	1.26741e+07	5.93133e+06	1.07498e+07
	11.454_422.26634	422.266	C25 H34 N4 O2	N-{[(2r,4s,5r)-5-(3-cyclopentyl-1-methyl-1h-pyrazol-5-yl)-1-azabicyclo[2.2.2]oct-2-yl]methyl}-4-methoxybenzamide	866853	864424	1.0939e+06	976463	1.07638e+06	975808
	21.707_458.23279	458.233	C25 H29 F3 N4 O	N-{[(2r,4s,5r)-5-{2-methyl-6-[4-(trifluoromethyl)phenyl]-4-pyrimidinyl}-1-azabicyclo[2.2.2]oct-2-yl]methyl}cyclobutanecarboxamide	4.85961e+06	5.68243e+06	5.32943e+06	5.66242e+06	6.35955e+06	6.51792e+06
	5.026_458.14184	458.142	C22 H22 N4 O5	N-{4-[(2r,3r)-3-(hydroxymethyl)-5-oxo-4-(3-pyridinylmethyl)-2-morpholinyl]phenyl}-5-methyl-1,2-oxazole-3-carboxamide	3.47279e+07	2.6008e+07	2.85673e+07	1.08885e+08	3.17776e+07	3.38496e+07
	6.085_360.08769	360.088	C14 H15 F3 N4 O2 S	N1-(2-methoxy-5-methylphenyl)-2-{[4-methyl-5-(trifluoromethyl)-4h-1,2,4-triazol-3-yl]thio}acetamide	323183	222671	460020	5.88692e+06	313511	307746
	1.838_317.15833	317.158	C19 H24 Cl N O	N1-(3-chlorobenzyl)-2-(1-adamantyl)acetamide	6.39178e+06	7.33246e+06	6.02956e+06	1.60658e+06	1.37557e+07	9.6091e+06
	4.581_402.11582	402.116	C15 H22 N4 O7 S	N1-(3-methoxypropyl)-2-(3,4,5-trimethoxy-2-nitrobenzoyl)hydrazine-1-carbothioamide	3.63651e+06	5.03822e+06	3.74276e+06	6.0047e+06	4.38182e+06	4.03872e+06
	8.969_410.19698	410.197	C22 H26 N4 O4	N1-(3-piperidinopropyl)-2-[(4-nitrobenzoyl)amino]benzamide	8.38214e+06	7.57632e+06	5.9528e+06	1.05233e+06	2.97408e+06	5.36081e+06
	6.469_376.20937	376.209	C19 H28 N4 O4	N'1,n'3-bis[(2,2-dimethylpropanoyl)oxy]-5-methylbenzene-1,3-dicarboximidamide	2.0632e+06	2.17578e+06	2.11517e+06	4.52095e+06	1.97481e+06	2.09281e+06
	5.299_278.12953	278.13	C15 H14 N6	N2,1-diphenyl-6-imino-1,6-dihydro-1,3,5-triazine-2,4-diamine	3.95265e+06	4.56094e+06	4.18607e+06	3.39709e+06	3.57214e+06	3.29389e+06
	7.238_294.10993	294.11	C16 H14 N4 O2	N2-[2-(2-pyridyl)ethyl]-4-hydroxyquinazoline-2-carboxamide	2.00836e+06	2.05136e+06	2.09484e+06	2.10971e+06	1.13183e+06	1.28021e+06
	5.538_173.10519	173.105	C8 H15 N O3	N-acetyl-d-alloisoleucine	4.61742e+07	5.5021e+07	5.15283e+07	5.5413e+07	3.02287e+07	3.0077e+07
	0.804_189.06345	189.063	C7 H11 N O5	N-acetyl-dl-glutamic acid	5.785e+07	4.73014e+07	4.66631e+07	1.03642e+08	4.13255e+07	4.17954e+07
	6.582_246.10008	246.1	C13 H14 N2 O3	N-Acetyl-DL-Tryptophan	1.38038e+07	1.44228e+07	1.51422e+07	6.77826e+06	1.7217e+07	1.62731e+07
	1.054_117.04261	117.043	C4 H7 N O3	N-acetylglycine	1.59985e+06	1.11819e+06	1.16793e+06	2.93588e+06	437540	435902
	3.865_191.06155	191.062	C7 H13 N O3 S	N-acetyl-l-methionine	3.8733e+07	3.54809e+07	4.25673e+07	1.25588e+07	8.44921e+07	5.98095e+07
	5.569_207.08936	207.089	C11 H13 N O3	N-Acetyl-L-phenylalanine	6.63912e+06	7.41174e+06	7.66673e+06	1.15214e+07	7.07217e+06	8.08589e+06
	6.069_207.08950	207.089	C11 H13 N O3	N-acetyl-l-phenylalanine	5.10014e+07	5.21076e+07	5.42993e+07	2.30642e+07	4.42163e+07	4.68606e+07
	3.557_159.08944	159.089	C7 H13 N O3	N-acetylvaline	1.03903e+07	1.00964e+07	9.80909e+06	1.85204e+07	6.48514e+06	6.68048e+06
	6.713_624.16997	624.17	C28 H32 O16	Narcissoside	1.30875e+06	1.25514e+06	1.16154e+06	975700	1.36823e+06	1.25956e+06
	9.795_272.06810	272.068	C15 H12 O5	Naringenin	1.34268e+06	1.49783e+06	1.00098e+06	1.43878e+06	1.49319e+06	1.62704e+06
	7.479_272.06804	272.068	C15 H12 O5	Naringenin chalcone	2.50071e+06	2.73656e+06	3.5814e+06	1.07739e+06	4.72319e+06	4.14755e+06
	5.395_317.19472	317.195	C19 H27 N O3	Nateglinide	1.2475e+06	1.29018e+06	1.64761e+06	373101	3.58114e+06	3.08125e+06
	8.021_405.21813	405.218	C22 H31 N3 O2	N-benzyl-2-{(3r,4s)-3-[(5-butyl-1,2-oxazol-3-yl)methyl]-4-piperidinyl}acetamide	1.67809e+06	2.649e+06	2.29491e+06	579110	792321	1.02118e+06
	7.092_354.09450	354.094	C16 H18 O9	Neochlorogenic acid	18409.6	3.85418e+06	18309.6	18841	15050.3	16200.9
	8.153_192.04215	192.042	C10 H8 O4	Noreugenin	4.47957e+06	4.66825e+06	4.36681e+06	4.04263e+06	4.77786e+06	4.96354e+06
	5.219_282.14640	282.146	C15 H22 O5	Octyl gallate	1.46752e+06	1.68058e+06	1.58695e+06	3.94879e+06	1.75254e+06	1.66316e+06
	14.271_278.22405	278.224	C18 H30 O2	Oleic acid alkyne	5.23225e+06	5.93645e+06	9.64376e+06	5.87567e+06	1.02386e+07	9.75219e+06
	18.794_278.22407	278.224	C18 H30 O2	Oleic acid alkyne	8.42571e+06	8.47891e+06	8.05167e+06	4.40088e+06	3.94608e+06	9.05089e+06
	9.667_522.35457	522.355	C28 H50 N4 O3 S	Oleic acid-biotin	45172	3.43514e+06	272865	219951	335204	361900
	16.312_436.25841	436.258	C21 H41 O7 P	Oleoyl-l-α-lysophosphatidic acid	638680	1.13249e+06	1.15796e+06	209013	7.51067e+06	3.99529e+06
	8.779_476.13114	476.131	C22 H22 O9	Ononin	2.28394e+06	2.90112e+06	3.08041e+06	189516	2.47904e+06	2.45864e+06
	3.561_448.15764	448.158	C19 H28 O12	Orcinol gentiobioside	3.93366e+06	4.3022e+06	4.97943e+06	3.18469e+06	4.33547e+06	4.04219e+06
	0.745_132.08970	132.09	C5 H12 N2 O2	Ornithine	1.03824e+08	1.20713e+08	1.26879e+08	1.87114e+08	2.03369e+08	1.87906e+08
	6.301_168.04219	168.042	C8 H8 O4	Orsellinic acid	6.64838e+06	7.10454e+06	7.12304e+06	4.52851e+06	7.77835e+06	7.49216e+06
	4.695_350.09987	350.1	C16 H16 O6	Oxypeucedan hydrate	7.25451e+06	8.84059e+06	5.66145e+06	2.12478e+06	4.43259e+06	5.42686e+06
	4.498_460.15739	460.157	C20 H28 O12	Paeonolide	2.39514e+06	2.88045e+06	2.93956e+06	1.6357e+06	2.72732e+06	3.35619e+06
	16.228_256.23878	256.239	C16 H32 O2	Palmitic acid	5.5848e+06	5.9212e+06	7.70689e+06	1.1112e+06	3.38244e+06	4.03639e+06
	6.793_996.31471	996.315	C45 H56 O25	Parishin A	470934	391976	635248	2.08984e+06	296958	493107
	5.664_164.04739	164.047	C9 H8 O3	p-Coumaric acid	572001	661781	471367	2.71049e+06	638065	503420
	4.164_358.12611	358.126	C15 H20 O7	P-coumaryl alcohol 4-glucoside	1.96523e+06	368945	72993.2	626762	1.44644e+06	2.96049e+06
	8.228_314.07863	314.079	C17 H14 O6	Pectolinarigenin	1.48958e+06	1.46434e+06	1.49441e+06	902260	1.42367e+06	1.4602e+06
	9.995_696.41063	696.411	C36 H58 O10	Pedunculoside	1.10436e+07	1.27109e+07	1.26621e+07	1.68738e+08	1.17714e+07	1.15554e+07
	6.147_120.05756	120.058	C8 H8 O	Phenylacetaldehyde	2.7696e+07	3.1524e+07	3.57494e+07	1.57642e+07	3.07744e+07	3.2954e+07
	6.088_308.14680	308.147	C19 H20 N2 O2	Phenylbutazone	2.06267e+07	2.2061e+07	2.28869e+07	3.48273e+07	2.16922e+07	2.25537e+07
	9.611_274.08361	274.084	C15 H14 O5	Phloretin	4.84196e+08	5.04291e+08	5.76668e+08	2.24932e+08	6.09944e+08	5.44219e+08
	7.637_436.13632	436.136	C21 H24 O10	Phloridzin	1.89841e+07	1.96897e+07	2.37399e+07	2.00532e+07	2.23788e+07	2.39975e+07
	6.416_126.03169	126.032	C6 H6 O3	Phloroglucinol	2.844e+06	3.11146e+06	3.88658e+06	1.71296e+06	3.50441e+06	3.28093e+06
	4.711_166.02645	166.026	C8 H6 O4	Phthalic acid	6.71753e+07	4.85575e+07	4.71762e+07	6.6943e+07	3.83053e+07	4.27399e+07
	7.013_244.07316	244.073	C14 H12 O4	Piceatannol	1.19926e+07	1.29831e+07	1.46484e+07	4.28297e+06	1.57832e+07	1.31228e+07
	12.131_256.07313	256.073	C15 H12 O4	Pinocembrin	5.10304e+06	5.71219e+06	5.95913e+06	7.98393e+06	5.7791e+06	6.16153e+06
	6.137_640.20119	640.201	C29 H36 O16	Plantamajoside	476146	386837	367931	3.44075e+06	334842	368355
	9.217_224.10464	224.105	C12 H16 O4	Pogostone	1.40369e+06	1.14659e+06	1.2155e+06	1.79034e+06	1.25909e+06	1.24384e+06
	6.52_390.13097	390.131	C20 H22 O8	Polydatin	7.23906e+06	8.25878e+06	8.47709e+06	9.17879e+06	8.6205e+06	8.91039e+06
	2.121_226.09509	226.095	C10 H14 N2 O4	Porphobilinogen	8.40494e+06	9.26156e+06	8.5817e+06	7.1922e+06	1.03322e+07	6.31511e+06
	4.206_578.14239	578.142	C30 H26 O12	Procyanidin B1	8.25344e+07	8.74527e+07	8.871e+07	6.02594e+07	8.90763e+07	8.02993e+07
	5.364_578.14235	578.142	C30 H26 O12	Procyanidin B2	4.00684e+06	3.98811e+06	3.94588e+06	2.03839e+06	3.06958e+06	3.89606e+06
	3.245_212.06831	212.068	C10 H12 O5	Propyl gallate	3.60281e+06	6.86143e+06	7.28386e+06	2.50992e+06	6.23408e+06	6.57178e+06
	10.495_398.22766	398.228	C20 H32 O5	Prostaglandin f3α	2.498e+07	2.2799e+07	2.12146e+07	1.91283e+07	2.57891e+07	2.56776e+07
	2.444_138.03166	138.032	C7 H6 O3	Protocatechualdehyde	8.66392e+06	1.1561e+07	1.03987e+07	3.57995e+06	1.51764e+07	1.07521e+07
	12.318_432.17791	432.178	C23 H28 O8	Pseudolaric acid B	5.66131e+06	5.60762e+06	7.60634e+06	3.04648e+06	1.15805e+07	7.92971e+06
	0.754_120.04205	120.042	C5 H4 N4	Purine	1.32614e+09	1.09507e+09	1.0925e+09	6.07385e+08	1.20883e+09	1.39197e+09
	1.479_126.03173	126.032	C6 H6 O3	Pyrogallol	1.2696e+08	1.57956e+08	1.62308e+08	4.34913e+07	1.70976e+08	1.41878e+08
	6.74_302.04147	302.041	C15 H10 O7	Quercetin	2.72032e+06	3.4463e+06	3.55135e+06	473468	4.24606e+06	3.56872e+06
	6.584_478.07400	478.074	C21 H18 O13	Quercetin 3-O-β-D-Glucuronide	1.73122e+07	1.49722e+07	1.64471e+07	63539.8	1.60232e+07	1.491e+07
	5.072_788.20402	788.204	C33 H40 O22	Quercetin-3-O-β-D-glucose-7-O-β-D-gentiobioside	1.97631e+06	1.68984e+06	1.96775e+06	1.42893e+06	1.68657e+06	1.59206e+06
	14.802_486.33353	486.334	C30 H46 O5	Quillaic acid	5.07884e+06	6.32136e+06	5.8065e+06	2.06432e+07	5.59601e+06	5.75744e+06
	4.699_192.06325	192.063	C7 H12 O6	Quinic acid	839775	8.96531e+06	1.27637e+06	581943	1.11186e+06	1.07567e+06
	0.767_504.16739	504.167	C18 H32 O16	Raffinose	1.72866e+07	9.12274e+06	6.55853e+06	2.20216e+07	8.50177e+06	2.02107e+07
	4.79_110.03679	110.037	C6 H6 O2	Resorcinol	5.32724e+06	7.6088e+06	6.67501e+06	980126	6.82873e+06	7.07627e+06
	8.111_228.07844	228.078	C14 H12 O3	Resveratrol	1.69631e+06	1.87641e+06	1.88341e+06	1.18087e+06	1.92571e+06	1.70068e+06
	18.076_686.38125	686.381	C36 H58 O10	Rosamultin	3.04018e+06	3.03331e+06	3.43108e+06	4.25592e+06	3.58104e+06	3.3006e+06
	6.234_610.15280	610.153	C27 H30 O16	Rutin	7.46745e+07	8.13553e+07	7.40738e+07	6.33855e+07	6.93712e+07	7.84001e+07
	4.266_138.03163	138.032	C7 H6 O3	Salicylic acid	1.00608e+07	7.74703e+06	7.6197e+06	1.35959e+07	7.58456e+06	8.07029e+06
	8.542_492.10689	492.107	C26 H20 O10	Salvianolic acid C	1.11419e+07	1.41572e+07	1.39692e+07	1.94038e+06	1.78125e+07	1.45526e+07
	2.057_428.15240	428.152	C22 H19 F3 N4 O2	Sb243213a	7.61629e+06	7.40499e+06	6.74964e+06	1.3032e+06	6.23401e+06	6.06007e+06
	1.469_476.09466	476.095	C22 H20 O12	Scutellarin methyl ester	2.09676e+07	2.23646e+07	2.58148e+07	3.32829e+06	2.24192e+07	3.40345e+07
	7.133_462.07918	462.079	C21 H18 O12	Scutellarin	9.61531e+06	9.84607e+06	9.49776e+06	62903.3	1.03611e+07	1.0089e+07
	4.217_452.15240	452.152	C17 H26 O11	Shanzhiside methyl ester	1.44491e+06	1.68391e+06	1.35558e+06	2.6892e+06	2.18675e+06	1.87767e+06
	3.51_392.13138	392.131	C16 H24 O11	Shanzhiside	7.78529e+06	8.50473e+06	7.35714e+06	1.77063e+07	9.66254e+06	7.41445e+06
	1.386_174.05266	174.053	C7 H10 O5	Shikimic acid	5.86906e+07	5.03295e+07	5.16347e+07	5.34446e+07	4.68154e+07	4.81219e+07
	5.488_462.13668	462.137	C19 H26 O13	Sibiricose a3	5.67286e+07	5.72335e+07	6.01567e+07	4.20776e+07	7.0171e+07	6.49855e+07
	4.922_518.16268	518.163	C22 H30 O14	Sibiricose A5	1.84985e+06	1.79214e+06	1.69975e+06	2.23799e+06	2.02381e+06	1.93885e+06
	6.662_224.06826	224.068	C11 H12 O5	Sinapinic acid	1.17377e+07	1.30196e+07	1.39956e+07	1.24706e+07	1.44578e+07	1.4321e+07
	6.28_174.08908	174.089	C8 H14 O4	Suberic acid	6.76798e+06	5.23818e+06	4.79902e+06	8.06124e+06	5.20101e+06	5.54173e+06
	1.176_118.02660	118.027	C4 H6 O4	Succinic acid	2.20526e+08	1.74624e+08	1.64944e+08	2.80678e+08	1.49547e+08	1.88251e+08
	0.877_342.11577	342.116	C12 H22 O11	Sucrose	1.64025e+07	1.49424e+07	1.83978e+07	8.5035e+07	9.65555e+06	1.21479e+07
	5.289_198.05263	198.053	C9 H10 O5	Syringic acid	1.76817e+06	1.59649e+06	1.84731e+06	2.83857e+06	1.87852e+06	1.76799e+06
	6.68_304.05792	304.058	C15 H12 O7	Taxifolin	2.74351e+07	2.89144e+07	3.18949e+07	7.09282e+06	3.7718e+07	3.01934e+07
	7.996_680.37896	680.379	C36 H56 O12	Tenuifolin	5.57167e+06	8.03674e+06	8.14623e+06	8.96264e+06	5.95099e+06	6.97283e+06
	11.695_464.24016	464.24	C25 H36 O8	Testosterone glucuronide	4.85584e+06	4.04671e+06	1.82014e+06	6.20447e+06	2.25163e+06	4.46501e+06
	9.37_258.18272	258.183	C14 H26 O4	Tetradecanedioic acid	255402	182818	70999.5	1.2738e+06	222737	334625
	7.128_574.24151	574.242	C30 H38 O11	Toosendanin	8.18722e+06	8.1094e+06	8.13757e+06	1.95081e+06	7.78896e+06	5.72785e+06
	7.469_596.21041	596.21	C27 H34 O12	Tracheloside	6.34666e+06	6.96424e+06	8.30631e+06	1.81898e+06	7.09304e+06	5.20089e+06
	6.984_148.05241	148.052	C9 H8 O2	Trans-cinnamic acid	8.81594e+07	1.14617e+08	1.14282e+08	4.01141e+07	6.67737e+07	7.71517e+07
	6.806_194.05774	194.058	C10 H10 O4	trans-ferulic acid	1.68575e+06	1.51769e+06	1.03849e+06	2.8593e+06	1.48317e+06	1.59393e+06
	9.739_210.12538	210.125	C12 H18 O3	trans-Jasmonic Acid	9.80393e+07	1.02385e+08	1.05595e+08	7.29509e+07	1.11276e+08	1.12832e+08
	2.873_219.11173	219.112	C10 H13 N5 O	Trans-zeatin	8.90922e+06	1.59055e+07	6.51559e+06	221379	786831	4.59642e+06
	6.981_436.13652	436.137	C21 H24 O10	Trilobatin	3.94661e+07	4.71818e+07	5.0226e+07	3.13154e+07	7.13038e+07	6.53782e+07
	3.716_252.11062	252.111	C12 H16 N2 O4	Tyrosylalanine	1.55034e+06	2.35344e+06	2.77909e+06	449694	7.62113e+06	5.816e+06
	0.659_607.08093	607.081	C17 H27 N3 O17 P2	Udp-n-acetylglucosamine	2.12587e+07	1.47335e+07	1.70134e+07	2.06218e+06	1.21559e+07	1.47794e+07
	0.654_566.05488	566.055	C15 H24 N2 O17 P2	Uridine 5'-diphosphogalactose	4.24905e+07	3.44382e+07	3.87036e+07	2.69465e+06	3.42626e+07	2.96334e+07
	0.828_324.03726	324.037	C9 H13 N2 O9 P	Uridine monophosphate (ump)	6.95343e+06	6.68245e+06	6.09232e+06	291467	460425	1.37774e+06
	1.101_244.06898	244.069	C9 H12 N2 O6	Uridine	1.48131e+08	1.45316e+08	1.78212e+08	5.55505e+07	2.38947e+08	1.97101e+08
	19.414_456.35956	456.36	C30 H48 O3	Ursolic acid	1.16909e+08	1.33323e+08	1.52804e+08	1.50284e+08	1.70782e+08	1.52231e+08
	1.421_168.04225	168.042	C8 H8 O4	Vanillic acid	6.19038e+06	7.80186e+06	8.0465e+06	673948	9.98609e+06	6.94685e+06
	1.983_434.14174	434.142	C17 H24 O10	Verbenalin	3.05416e+07	3.20043e+07	2.68947e+07	2.53298e+07	2.73922e+07	2.34683e+07
	7.233_564.14787	564.148	C26 H28 O14	Vicenin III	6.71341e+06	6.75098e+06	6.45186e+06	8.79511e+06	5.50391e+06	6.48817e+06
	1.388_284.07513	284.075	C10 H12 N4 O6	Xanthosine	2.32763e+07	1.97692e+07	1.20355e+07	2.191e+07	8.28727e+06	1.48352e+07
	11.441_616.29078	616.291	C35 H38 F2 N4 O4	Ym218	970520	572041	847647	2.14053e+06	650162	540529
	0.766_342.11550	342.115	C12 H22 O11	Α,α-trehalose	1.66047e+08	1.01701e+08	1.44788e+08	2.47829e+08	7.49731e+07	1.38723e+08
	4.623_426.17319	426.173	C17 H30 O12	Α-d-glucopyranosyl 3-o-(2-methylbutanoyl)-α-d-glucopyranoside	3.72601e+06	3.77816e+06	3.60054e+06	3.09499e+06	3.56293e+06	4.17907e+06
	6.487_414.22500	414.225	C20 H32 O6	Δ17-6-keto prostaglandin f1α	6.66992e+06	7.25659e+06	9.20628e+06	885662	1.44523e+07	1.52269e+07
	0.77_178.04741	178.047	C6 H10 O6	Δ-gluconic acid δ-lactone	1.36869e+08	1.05674e+08	1.04643e+08	4.87559e+07	1.10323e+08	1.12452e+08
	0.754_148.03702	148.037	C5 H8 O5	Δ-ribono-1,4-lactone	2.58427e+08	2.00865e+08	2.06478e+08	2.56366e+08	2.45203e+08	2.58023e+08
